# Supplementary material for: A Dose-Dependent Association between Alcohol Consumption and Incidence of Proteinuria and Low Glomerular Filtration Rate: A Systematic Review and Meta-Analysis of Cohort Studies
Source: MDPI journal article supplement (doi:10.3390/nu15071592), 2023-03-25
Supplement: s1 [file s1]

## Supplementary Materials

**Table S1.** Newcastle–Ottawa scale (NOS) of 12 publications from 11 cohort studies.

**Table S2.** Alcohol consumption and incidence of proteinuria stratified by major study characteristics.

**Table S3.** Alcohol consumption and incidence of eGFR of  $<60$  mL/min/1.73 m<sup>2</sup> stratified by major study characteristics.

### Figure legends.

**Figure S1.** Flow diagram of study selection.

**Figure S2.** Funnel plots of relative risks to estimate associations of alcohol consumption of  $\leq 12.0$  (a), 12.1–36.0 (b), and 36.1–60.0 (c) with incidence of proteinuria and those of  $\leq 12.0$  (d), 12.1–36.0 (e), and 36.1–60.0 (f) with incidence of eGFR  $<60$  mL/min/1.73 m<sup>2</sup>.

**Figure S3.** Forest plots of relative risks to estimate an association between alcohol consumption of  $<12$  g/day and incidence of proteinuria stratified by sex (a), study size (b), age (c), body mass index (d), eGFR (e), prevalence of diabetes (f), prevalence of hypertension (g), follow-up length (h), Newcastle–Ottawa scale (i), and Asian and Western countries (j).

**Figure S4.** Forest plots of relative risks to estimate an association between alcohol consumption of 12.1–36.0 g/day and incidence of proteinuria stratified by sex (a), study size (b), age (c), body mass index (d), eGFR (e), prevalence of diabetes (f), prevalence of hypertension (g), follow-up length (h), Newcastle–Ottawa scale (i), and Asian and Western countries (j).

**Figure S5.** Forest plots of relative risks to estimate an association between alcohol consumption of 36.0–60.0 g/day and incidence of proteinuria stratified by sex (a), study size (b), age (c), body mass index (d), eGFR (e), prevalence of diabetes (f), prevalence of hypertension (g), follow-up length (h), Newcastle–Ottawa scale (i), and Asian and Western countries (j).

**Figure S6.** Forest plots of relative risks to estimate an association between alcohol consumption of  $<12$  g/day and incidence of eGFR  $<60$  mL/min/1.73 m<sup>2</sup> stratified by sex (a), study size (b), age (c), body mass index (d), eGFR (e), prevalence of diabetes (f), prevalence of hypertension (g), follow-up length (h), Newcastle–Ottawa scale (i), and Asian and Western countries (j).

**Figure S7.** Forest plots of relative risks to estimate an association between alcohol consumption of 12.1–36.0 g/day and incidence of eGFR  $<60$  mL/min/1.73 m<sup>2</sup> stratified by sex (a), study size (b), age (c), body mass index (d), eGFR (e), prevalence of diabetes (f), prevalence of hypertension (g), follow-up length (h), Newcastle–Ottawa scale (i), and Asian and Western countries (j).

**Figure S8.** Forest plots of relative risks to estimate an association between alcohol consumption of 36.0–60.0 g/day and incidence of eGFR  $<60$  mL/min/1.73 m<sup>2</sup> stratified by sex (a), study size (b), age (c), body mass index (d), eGFR (e), prevalence of diabetes (f), prevalence of hypertension (g), follow-up length (h), Newcastle–Ottawa scale (i), and Asian and Western countries (j).

**Table S1.** Newcastle–Ottawa scale of 12 publications from 11 cohort studies.

| Publications       | PHS<br>2005 | Yamagata<br>2007 | ILSA<br>2011 | Nagai<br>2013 | Knasai<br>Healthcare<br>2014 | PREVEND<br>2015 | Knasai<br>Healthcare<br>2018 | Kimura<br>2018 | Park<br>2019 | ARIC<br>2020 | PROMISE<br>2021 | Tanaka<br>2022 |
|--------------------|-------------|------------------|--------------|---------------|------------------------------|-----------------|------------------------------|----------------|--------------|--------------|-----------------|----------------|
| Selection          |             |                  |              |               |                              |                 |                              |                |              |              |                 |                |
| Representativeness |             | *                | *            | *             |                              | *               |                              | *              | *            | *            |                 |                |
| Selection          |             | *                | *            | *             |                              | *               |                              | *              | *            | *            |                 |                |
| Ascertainment      |             |                  |              |               |                              |                 |                              |                |              |              |                 |                |
| Outcome            | *           | *                | *            | *             | *                            | *               | *                            | *              | *            | *            | *               | *              |
| Comparability      | *           | *                | *            | **            |                              | *               | *                            | **             | **           | **           | **              | **             |
| Outcome            |             |                  |              |               |                              |                 |                              |                |              |              |                 |                |
| Assessment         | *           | *                | *            | *             | *                            | *               | *                            | *              | *            | *            | *               | *              |
| Follow-up          | *           |                  |              |               | *                            | *               | *                            |                | *            | *            | *               |                |
| Adequacy           | *           | *                | *            | *             | *                            | *               | *                            | *              | *            | *            | *               | *              |
| Total score        | 5           | 6                | 6            | 7             | 5                            | 7               | 5                            | 7              | 8            | 8            | 6               | 5              |

Newcastle-Ottawa scale includes 8 items of 3 domains: (i) Selection, including representativeness of the exposed cohort, selection of the non-exposed, and ascertainment of exposure, demonstration that outcome of interest was not present at start of study; (ii) comparability of cohorts on the basis of the design or analysis; and (iii) outcome, including assessment of outcome, follow-up length enough for outcome to occur, and adequacy of follow-up of cohorts.

**Table S2.** Alcohol consumption and incidence of proteinuria stratified by study characteristics.

|                                     |          | ≤12.0 g/day |                   |                | 12.1–36.0 g/day |                   |                | 36.1–60.0 g/day |                   |                |
|-------------------------------------|----------|-------------|-------------------|----------------|-----------------|-------------------|----------------|-----------------|-------------------|----------------|
|                                     |          | N*          | RR (95% CI)       | I <sup>2</sup> | N*              | RR (95% CI)       | I <sup>2</sup> | N*              | RR (95% CI)       | I <sup>2</sup> |
| Sex, N <sup>‡</sup>                 | Men      | 7 (5)       | 0.87 (0.79, 0.96) | 89             | 6 (5)           | 0.96 (0.92, 1.01) | 93             | 4 (4)           | 1.09 (1.01, 1.18) | 57             |
|                                     | Women    | 4 (3)       | 0.89 (0.74, 1.07) | 95             | 4 (3)           | 1.06 (1.04, 1.08) | 10             | 3 (3)           | 1.16 (0.98, 1.37) | 47             |
| Study size, N <sup>‡</sup>          | < Median | 6 (4)       | 0.88 (0.79, 0.98) | 55             | 6 (4)           | 0.85 (0.73, 0.96) | 50             | 4 (4)           | 1.09 (0.90, 1.32) | 63             |
|                                     | ≥ Median | 8 (3)       | 0.87 (0.82, 0.92) | 97             | 7 (3)           | 1.01 (0.97, 1.05) | 94             | 4 (2)           | 1.10 (1.04, 1.16) | 60             |
| Age, yr <sup>†‡§</sup>              | < Median | 7 (4)       | 0.96 (0.91, 1.01) | 95             | 6 (2)           | 1.04 (1.00, 1.07) | 93             | 4 (2)           | 1.13 (1.08, 1.18) | 39             |
|                                     | ≥ Median | 7 (3)       | 0.80 (0.74, 0.87) | 66             | 7 (5)           | 0.83 (0.78, 0.89) | 1              | 4 (3)           | 1.00 (0.92, 1.08) | 0              |
| Body mass index, kg/m <sup>2</sup>  | < Median | 5 (4)       | 0.80 (0.74, 0.88) | 49             | 4 (4)           | 0.87 (0.79, 0.95) | 0              | 3 (3)           | 1.11 (0.78, 1.56) | 73             |
|                                     | ≥ Median | 7 (4)       | 0.87 (0.78, 0.96) | 74             | 5 (4)           | 0.86 (0.75, 0.97) | 60             | 3 (3)           | 1.04 (0.96, 1.12) | 0              |
| eGFR, mL/min/1.73 m <sup>2†‡</sup>  | < Median | 6 (3)       | 0.80 (0.73, 0.87) | 71             | 6 (4)           | 0.88 (0.81, 0.95) | 41             | 4 (3)           | 1.06 (0.87, 1.29) | 62             |
|                                     | ≥ Median | 6 (4)       | 0.95 (0.90, 1.01) | 96             | 6 (2)           | 1.03 (0.99, 1.07) | 94             | 4 (3)           | 1.14 (1.12, 1.15) | 0              |
| DM prevalence, % <sup>‡</sup>       | < Median | 7 (4)       | 0.86 (0.79, 0.94) | 62             | 7 (5)           | 0.87 (0.79, 0.96) | 41             | 4 (3)           | 1.14 (0.99, 1.30) | 30             |
|                                     | ≥ Median | 7 (4)       | 0.89 (0.84, 0.95) | 97             | 6 (3)           | 1.01 (0.97, 1.05) | 95             | 4 (3)           | 1.08 (1.00, 1.15) | 75             |
| HT prevalence, % <sup>†</sup>       | < Median | 7 (4)       | 0.96 (0.91, 1.01) | 95             | 7 (4)           | 0.98 (0.94, 1.03) | 90             | 4 (3)           | 1.14 (1.06, 1.23) | 30             |
|                                     | ≥ Median | 7 (3)       | 0.80 (0.74, 0.87) | 66             | 6 (4)           | 0.96 (0.89, 1.04) | 88             | 4 (3)           | 1.04 (0.95, 1.13) | 42             |
| Follow-up duration, yr <sup>‡</sup> | < Median | 8 (3)       | 0.85 (0.78, 0.93) | 77             | 6 (4)           | 0.88 (0.81, 0.97) | 41             | 4 (2)           | 1.12 (0.97, 1.29) | 54             |
|                                     | ≥ Median | 6 (4)       | 0.93 (0.87, 0.99) | 96             | 7 (3)           | 1.02 (0.98, 1.06) | 93             | 4 (3)           | 1.10 (1.04, 1.17) | 60             |
| Newcastle-Ottawa score              | < 7      | 4 (3)       | 0.87 (0.75, 1.02) | 73             | 4 (3)           | 0.89 (0.79, 1.01) | 44             | 4 (3)           | 1.09 (0.90, 1.32) | 63             |
|                                     | ≥ 7      | 10 (4)      | 0.87 (0.83, 0.92) | 96             | 9 (4)           | 1.00 (0.96, 1.04) | 92             | 4 (2)           | 1.10 (1.04, 1.16) | 60             |
| Country, N                          | Asian    | 13 (6)      | 0.87 (0.83, 0.92) | 95             | 11 (6)          | 0.99 (0.96, 1.03) | 91             | 7 (5)           | 1.09 (1.03, 1.15) | 57             |
|                                     | Western  | 2 (1)       |                   |                | 2 (1)           |                   |                | 0 (0)           |                   |                |
| All                                 |          | 14 (7)      | 0.87 (0.83, 0.92) | 95             | 13 (7)          | 0.98 (0.95, 1.02) | 90             | 8 (5)           | 1.09 (1.03, 1.15) | 57             |
| P for Egger's test                  |          |             | 0.041             |                |                 | <0.001            |                |                 | 0.141             |                |

CI, confidence interval; RR, relative risk

\*Number of estimates (Number of publications)

†P &lt;0.05 for group difference in alcohol consumption of ≤12.0 g/day

‡P &lt;0.05 for group difference in alcohol consumption of 12.1–36.0 g/day

§P &lt;0.05 for group difference in alcohol consumption of 36.1–60.0 g/day

**Table S3.** Alcohol consumption and incidence of low eGFR of <60 mL/min/1.73 m<sup>2</sup> stratified by study characteristics.

|                                      |          | ≤12.0 g/day |                   |                | 12.1–36.0 g/day |                   |                | 36.1–60.0 g/day |                   |                |
|--------------------------------------|----------|-------------|-------------------|----------------|-----------------|-------------------|----------------|-----------------|-------------------|----------------|
|                                      |          | N*          | RR (95% CI)       | I <sup>2</sup> | N*              | RR (95% CI)       | I <sup>2</sup> | N*              | RR (95% CI)       | I <sup>2</sup> |
| Sex, N <sup>†</sup>                  | Men      | 8 (6)       | 0.96 (0.95, 0.97) | 1              | 8 (6)           | 0.84 (0.78, 0.90) | 74             | 4 (4)           | 0.86 (0.80, 0.92) | 0              |
|                                      | Women    | 5 (4)       | 0.92 (0.89, 0.96) | 18             | 6 (4)           | 0.83 (0.77, 0.90) | 95             | 2 (2)           |                   |                |
| Study size, N                        | < Median | 9 (6)       | 0.91 (0.83, 0.99) | 0              | 9 (5)           | 0.72 (0.59, 0.87) | 47             | 3 (3)           | 1.01 (0.56, 1.83) | 76             |
|                                      | ≥ Median | 9 (4)       | 0.93 (0.90, 0.96) | 81             | 10 (5)          | 0.84 (0.80, 0.88) | 94             | 4 (3)           | 0.86 (0.74, 1.00) | 89             |
| Age, yr <sup>‡</sup>                 | < Median | 9 (5)       | 0.95 (0.91, 0.98) | 79             | 9 (4)           | 0.83 (0.79, 0.88) | 95             | 3 (2)           | 1.01 (0.77, 1.32) | 74             |
|                                      | ≥ Median | 9 (4)       | 0.90 (0.87, 0.94) | 0              | 10 (5)          | 0.76 (0.66, 0.88) | 38             | 4 (4)           | 0.84 (0.67, 1.07) | 65             |
| Body mass index, kg/m <sup>2†‡</sup> | < Median | 8 (4)       | 0.92 (0.89, 0.96) | 0              | 7 (5)           | 0.84 (0.72, 0.98) | 62             | 2 (2)           |                   |                |
|                                      | ≥ Median | 8 (4)       | 0.84 (0.78, 0.91) | 0              | 8 (3)           | 0.65 (0.56, 0.74) | 0              | 3 (3)           | 0.83 (0.70, 0.99) | 0              |
| eGFR, mL/min/1.73 m <sup>2‡</sup>    | < Median | 7 (4)       | 0.92 (0.89, 0.96) | 0              | 8 (5)           | 0.86 (0.80, 0.92) | 72             | 3 (3)           | 1.17 (0.71, 1.94) | 82             |
|                                      | ≥ Median | 7 (4)       | 0.93 (0.90, 0.97) | 85             | 6 (3)           | 0.78 (0.73, 0.84) | 96             | 3 (2)           | 0.82 (0.71, 0.94) | 89             |
| DM prevalence, % <sup>‡</sup>        | < Median | 9 (5)       | 0.92 (0.86, 0.97) | 15             | 11 (7)          | 0.81 (0.76, 0.86) | 92             | 3 (2)           | 1.00 (0.70, 1.43) | 76             |
|                                      | ≥ Median | 9 (5)       | 0.93 (0.90, 0.96) | 80             | 8 (3)           | 0.82 (0.76, 0.89) | 73             | 4 (3)           | 0.85 (0.72, 0.99) | 88             |
| HT prevalence, %                     | < Median | 10 (6)      | 0.94 (0.91, 0.97) | 77             | 10 (5)          | 0.83 (0.79, 0.88) | 94             | 4 (3)           | 0.92 (0.76, 1.12) | 76             |
|                                      | ≥ Median | 8 (4)       | 0.90 (0.85, 0.95) | 26             | 9 (4)           | 0.75 (0.64, 0.88) | 42             | 3 (3)           | 0.93 (0.56, 1.55) | 76             |
| Follow-up duration, yr <sup>†</sup>  | < Median | 7 (4)       | 0.95 (0.92, 0.98) | 83             | 7 (3)           | 0.92 (0.76, 1.12) | 13             | 3 (2)           | 1.11 (0.70, 1.75) | 60             |
|                                      | ≥ Median | 7 (4)       | 0.85 (0.80, 0.92) | 0              | 10 (5)          | 0.80 (0.76, 0.85) | 95             | 4 (3)           | 0.83 (0.72, 0.96) | 88             |
| Newcastle-Ottawa score               | < 7      | 12 (6)      | 0.92 (0.89, 0.96) | 0              | 11 (6)          | 0.83 (0.71, 0.96) | 50             | 5 (4)           | 1.05 (0.78, 1.42) | 66             |
|                                      | ≥ 7      | 6 (3)       | 0.93 (0.90, 0.96) | 87             | 8 (3)           | 0.82 (0.78, 0.87) | 96             | 2 (1)           |                   |                |
| Country, N <sup>†‡</sup>             | Asian    | 10 (5)      | 0.94 (0.91, 0.96) | 77             | 10 (5)          | 0.84 (0.80, 0.89) | 94             | 6 (4)           | 0.90 (0.78, 1.03) | 87             |
|                                      | Western  | 8 (4)       | 0.84 (0.78, 0.91) | 0              | 9 (4)           | 0.68 (0.61, 0.76) | 0              | 1 (1)           |                   |                |
| All                                  |          | 18 (9)      | 0.93 (0.90, 0.95) | 67             | 19 (9)          | 0.82 (0.78, 0.86) | 90             | 7 (5)           | 0.89 (0.77, 1.03) | 84             |
| P for Egger's test                   |          |             | 0.167             |                |                 | 0.048             |                |                 | 0.020             |                |

CI, confidence interval; RR, relative risk

\*Number of estimates (Number of publications)

†P &lt;0.05 for group difference in alcohol consumption of ≤12.0 g/day

‡P &lt;0.05 for group difference in alcohol consumption of 12.1–36.0 g/day

## Figure Legends

**Figure S1.** Flow diagram of study selection.

**Figure S2.** Forest plots of relative risks to estimate associations of alcohol consumption of  $\leq 12.0$  (a), 12.1–36.0 (b), and 36.1–60.0 (c) with incidence of proteinuria and those of  $\leq 12.0$  (d), 12.1–36.0 (e), and 36.1–60.0 (f) with incidence of eGFR  $< 60$  mL/min/1.73 m<sup>2</sup>.

**Figure S3.** Forest plots of relative risks to estimate an association between alcohol consumption of  $< 12$  g/day and incidence of proteinuria stratified by sex (a), study size (b), age (c), body mass index (d), eGFR (e), prevalence of diabetes (f), prevalence of hypertension (g), follow-up length (h), Newcastle-Ottawa scale (i), and Asian and Western countries (j).

CI, confidence interval; DM, diabetes mellitus; eGFR, estimated glomerular filtration rate; HT, hypertension; NOS, Newcastle-Ottawa scale; RR, relative risk.

**Figure S4.** Forest plots of relative risks to estimate an association between alcohol consumption of 12.1–36.0 g/day and incidence of proteinuria stratified by sex (a), study size (b), age (c), body mass index (d), eGFR (e), prevalence of diabetes (f), prevalence of hypertension (g), follow-up length (h), Newcastle-Ottawa scale (i), and Asian and Western countries (j).

CI, confidence interval; DM, diabetes mellitus; eGFR, estimated glomerular filtration rate; HT, hypertension; NOS, Newcastle-Ottawa scale; RR, relative risk.

**Figure S5** Forest plots of relative risks to estimate an association between alcohol consumption of 36.0–60.0 g/day and incidence of proteinuria stratified by sex (a), study size (b), age (c), body mass index (d), eGFR (e), prevalence of diabetes (f), prevalence of hypertension (g), follow-up length (h), Newcastle-Ottawa scale (i), and Asian and Western countries (j).

CI, confidence interval; DM, diabetes mellitus; eGFR, estimated glomerular filtration rate; HT, hypertension; NOS, Newcastle-Ottawa scale; RR, relative risk.

**Figure S6.** Forest plots of relative risks to estimate an association between alcohol consumption of  $< 12$  g/day and incidence of eGFR  $< 60$  mL/min/1.73 m<sup>2</sup> stratified by sex (a), study size (b), age (c), body mass index (d), eGFR (e), prevalence of diabetes (f), prevalence of hypertension (g), follow-up length (h), Newcastle-Ottawa scale (i), and Asian and Western countries (j).

CI, confidence interval; DM, diabetes mellitus; eGFR, estimated glomerular filtration rate; HT, hypertension; NOS, Newcastle-Ottawa scale; RR, relative risk.

**Figure S7.** Forest plots of relative risks to estimate an association between alcohol consumption of 12.1–36.0 g/day and incidence of eGFR  $< 60$  mL/min/1.73 m<sup>2</sup> stratified by sex (a), study size (b), age (c), body mass index (d), eGFR (e), prevalence of diabetes (f),

prevalence of hypertension (g), follow-up length (h), Newcastle-Ottawa scale (i), and Asian and Western countries (j).

CI, confidence interval; DM, diabetes mellitus; eGFR, estimated glomerular filtration rate; HT, hypertension; NOS, Newcastle-Ottawa scale; RR, relative risk.

**Figure S8.** Forest plots of relative risks to estimate an association between alcohol consumption of 36.0–60.0 g/day and incidence of eGFR <60 mL/min/1.73 m<sup>2</sup> stratified by sex (a), study size (b), age (c), body mass index (d), eGFR (e), prevalence of diabetes (f), prevalence of hypertension (g), follow-up length (h), Newcastle-Ottawa scale (i), and Asian and Western countries (j).

CI, confidence interval; DM, diabetes mellitus; eGFR, estimated glomerular filtration rate; HT, hypertension; NOS, Newcastle-Ottawa scale; RR, relative risk.

Figure S1

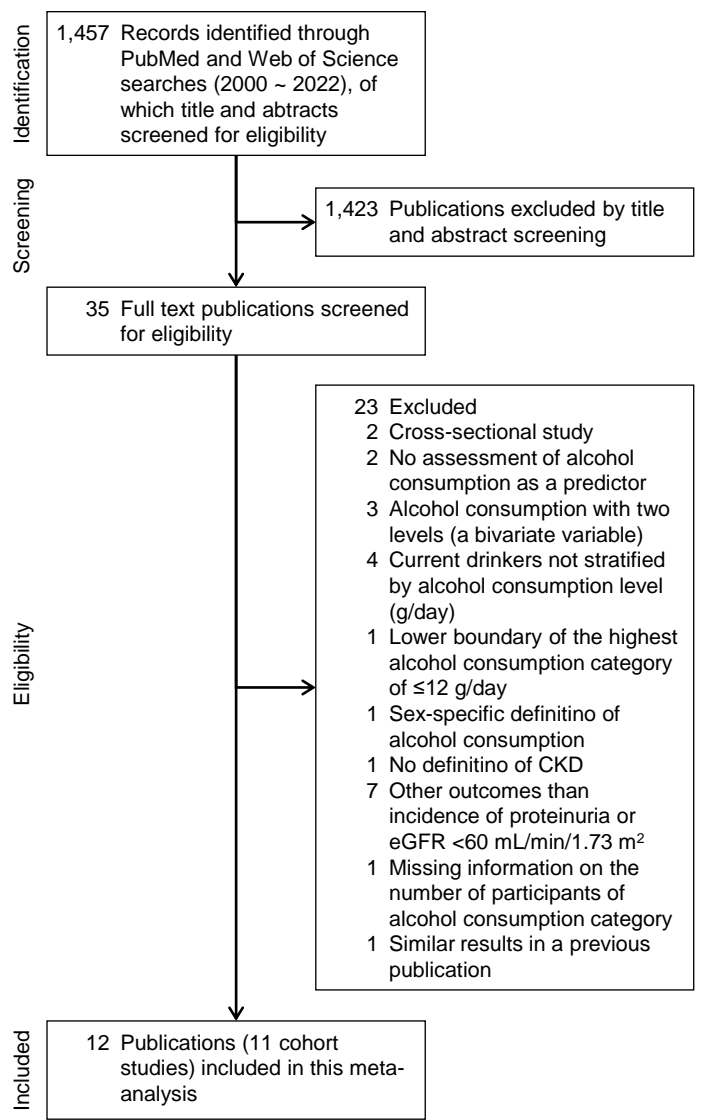

Figure S2

a.  $\leq 12.0$  g/day

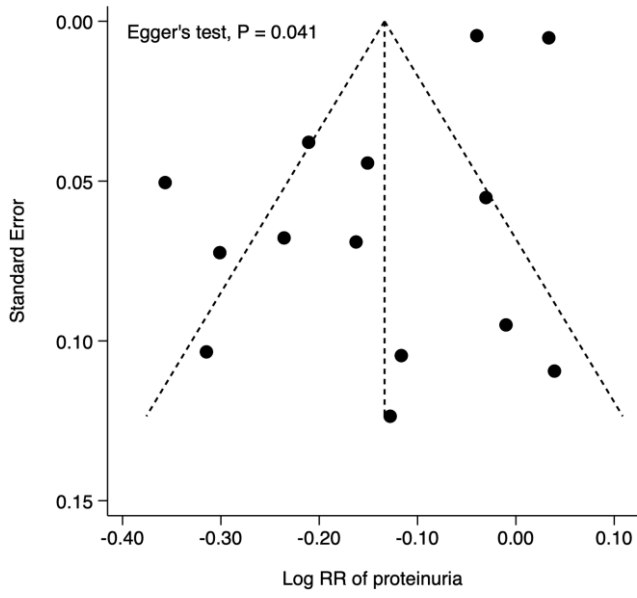

d.  $< 12.0$  g/day

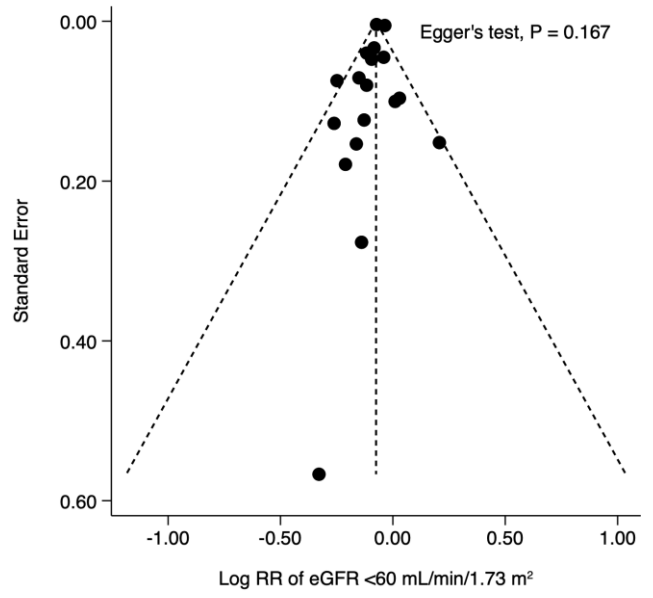

b. 12.1–36.0 g/day

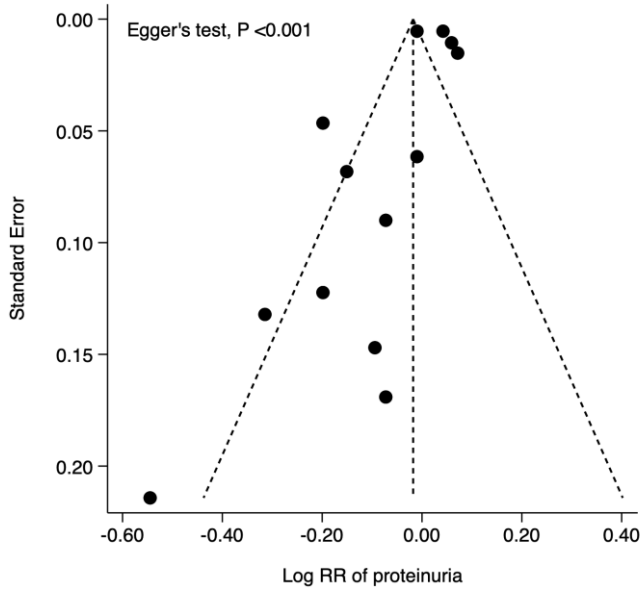

e. 12.1–36.0 g/day

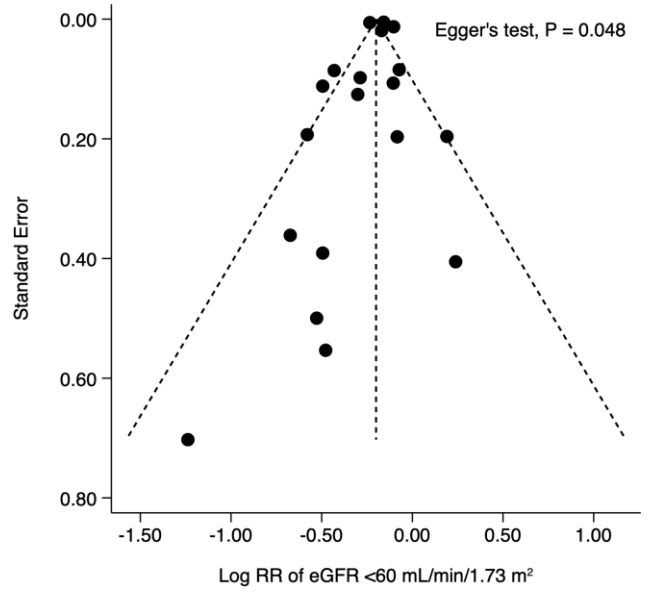

c. 36.1–60.0 g/day

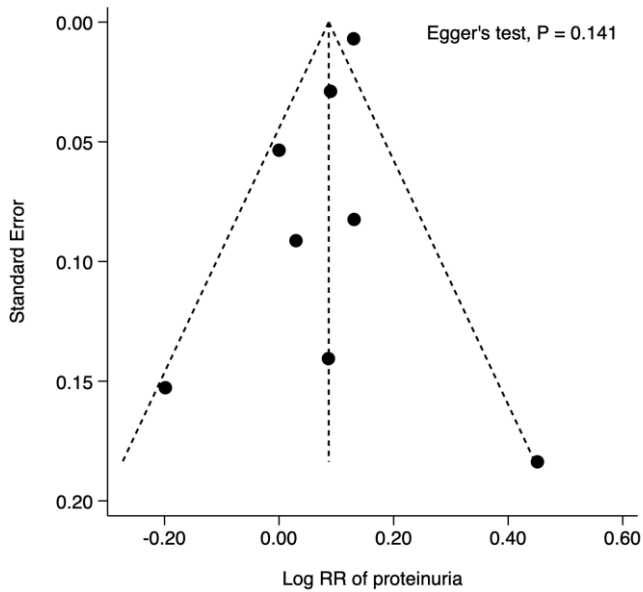

f. 36.1–60.0 g/day

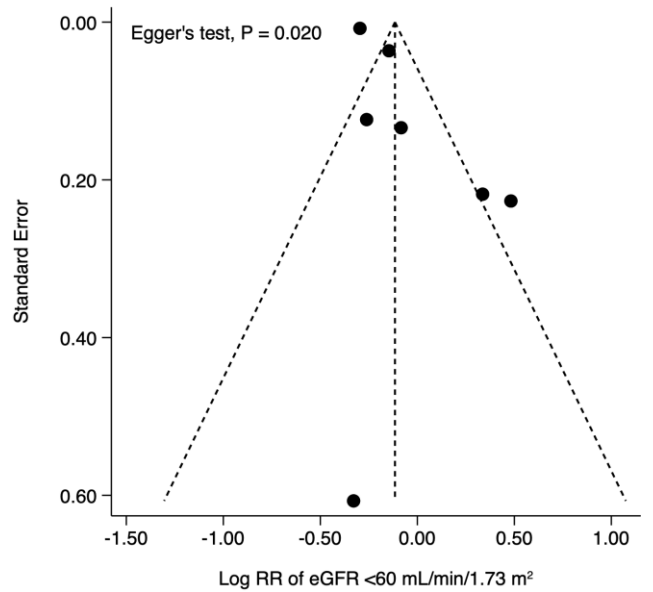



Figure S3a

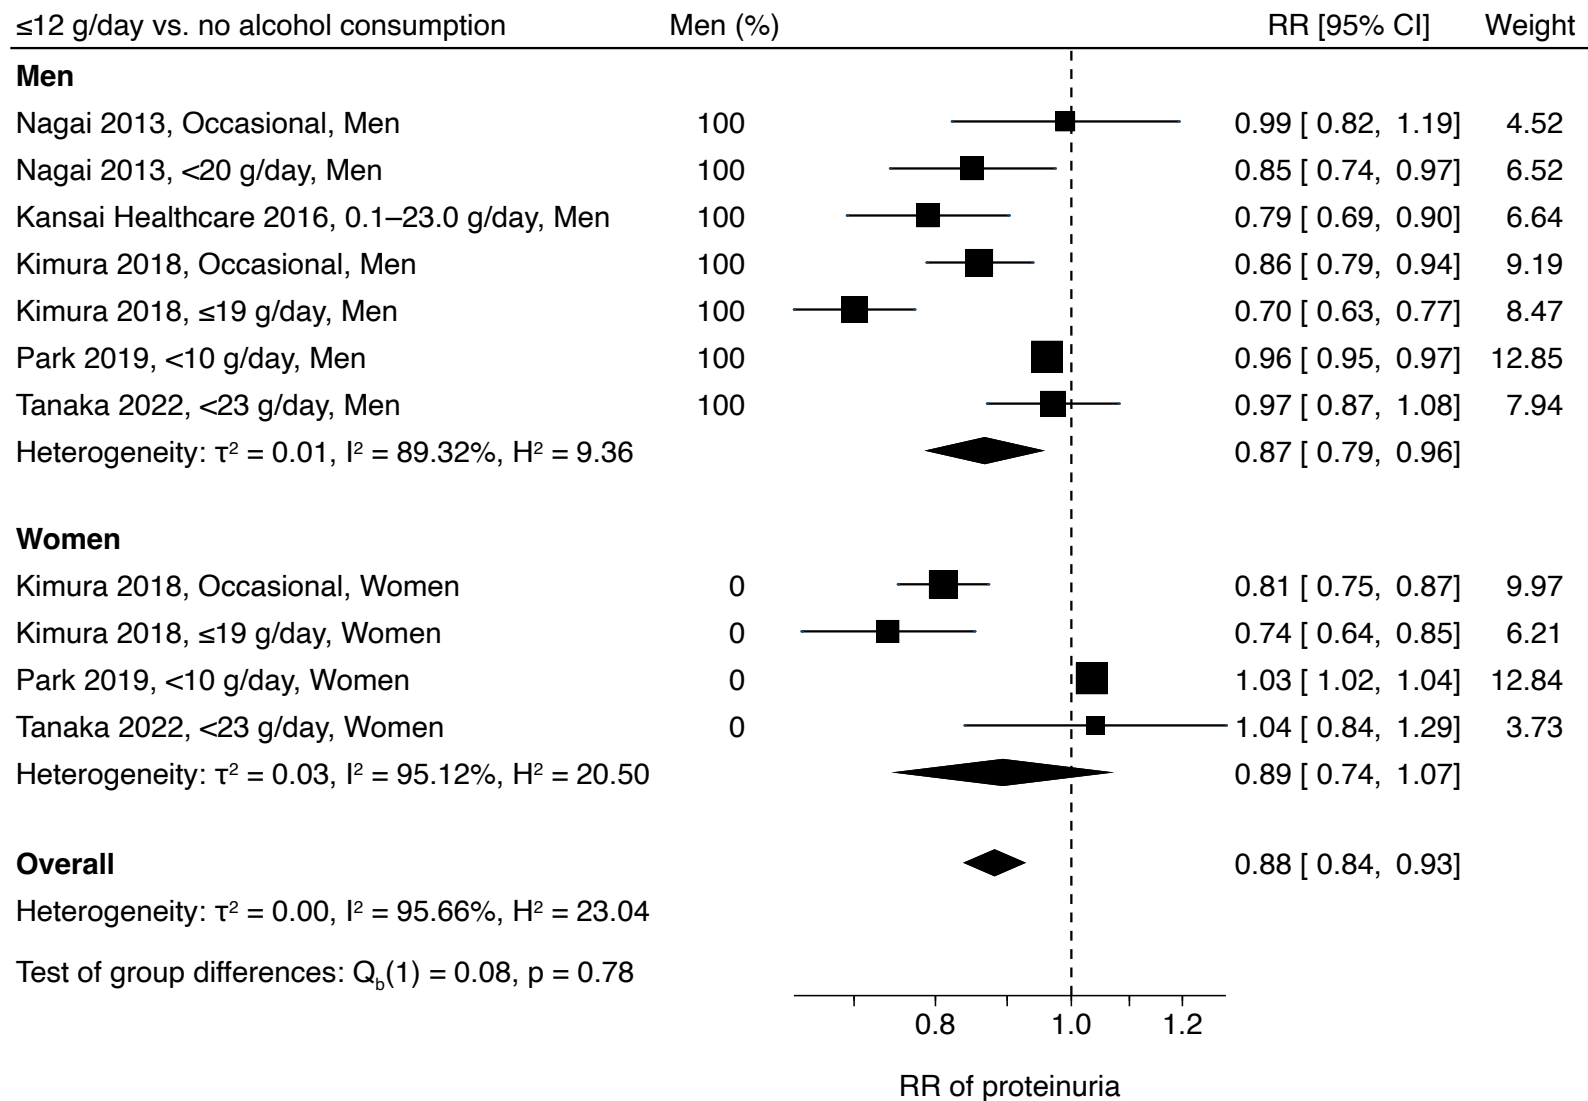

Figure S3b

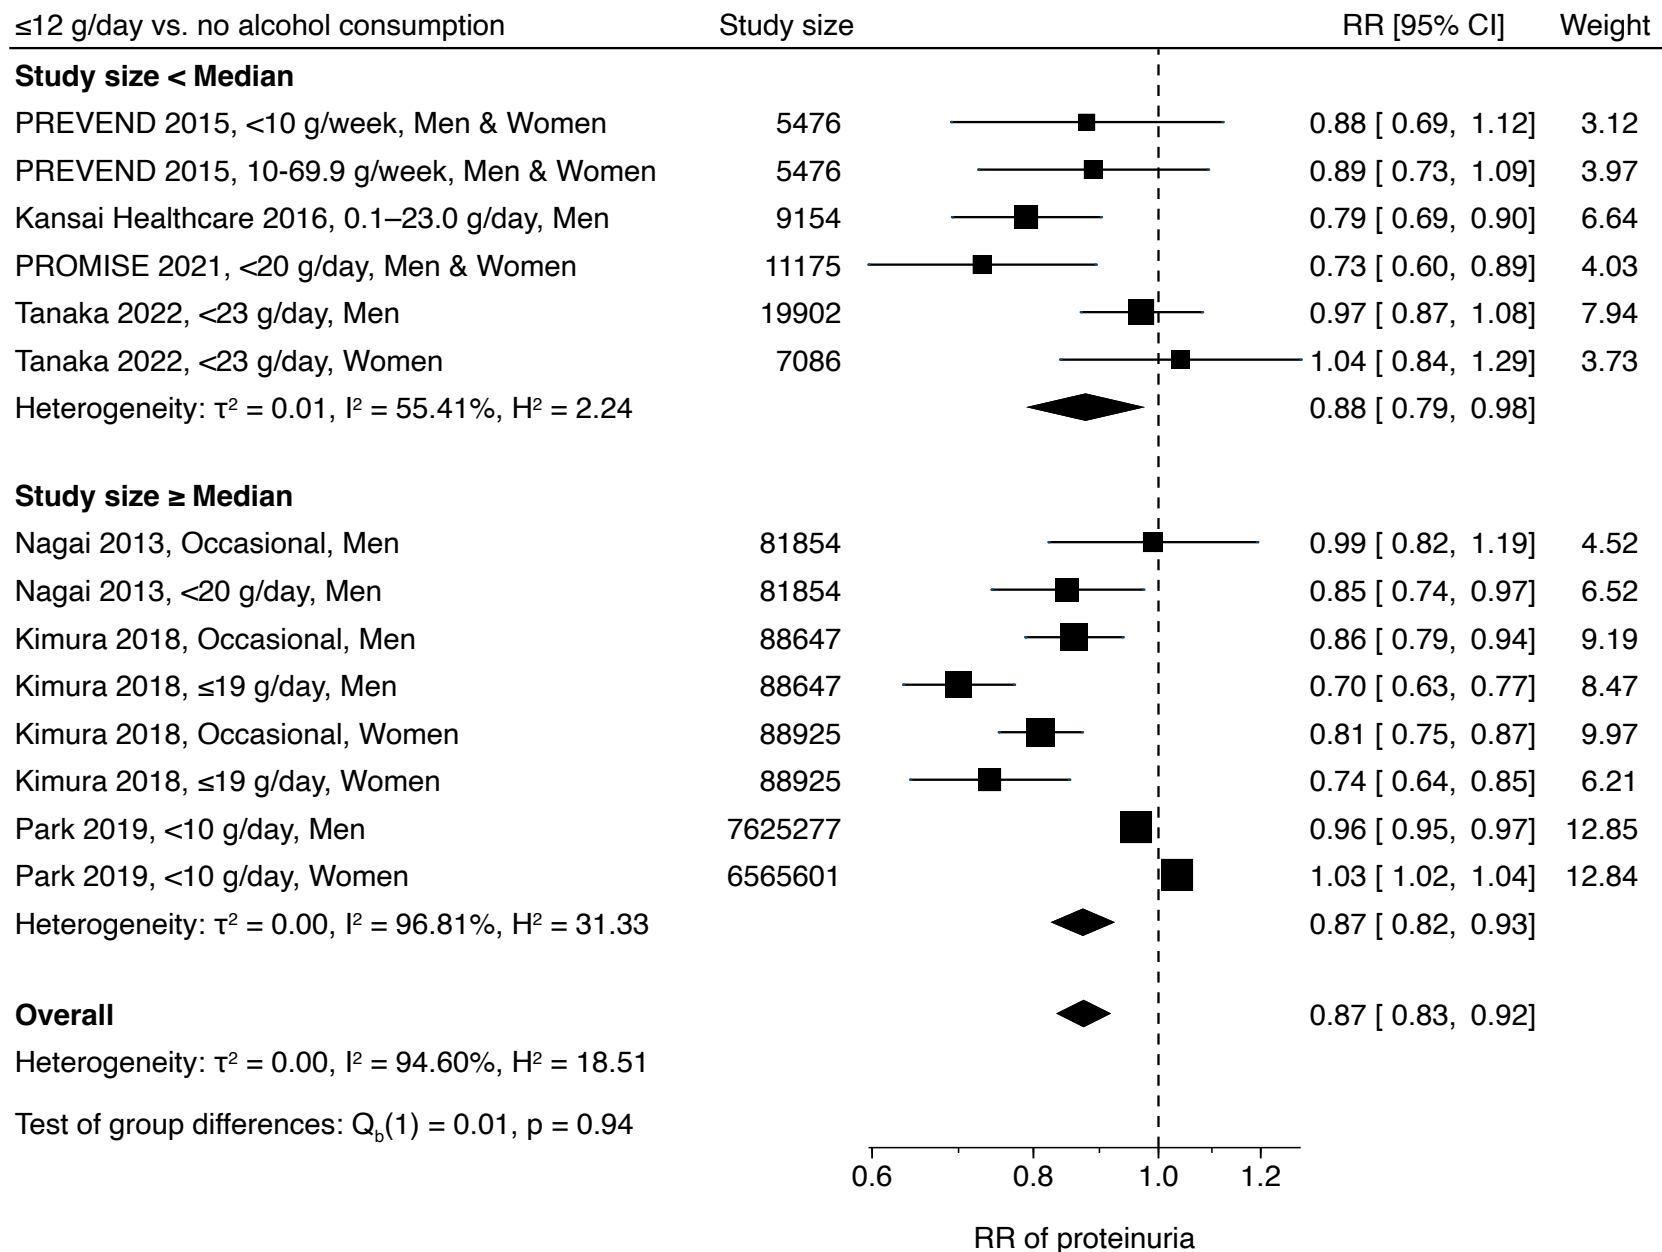

Figure S3c

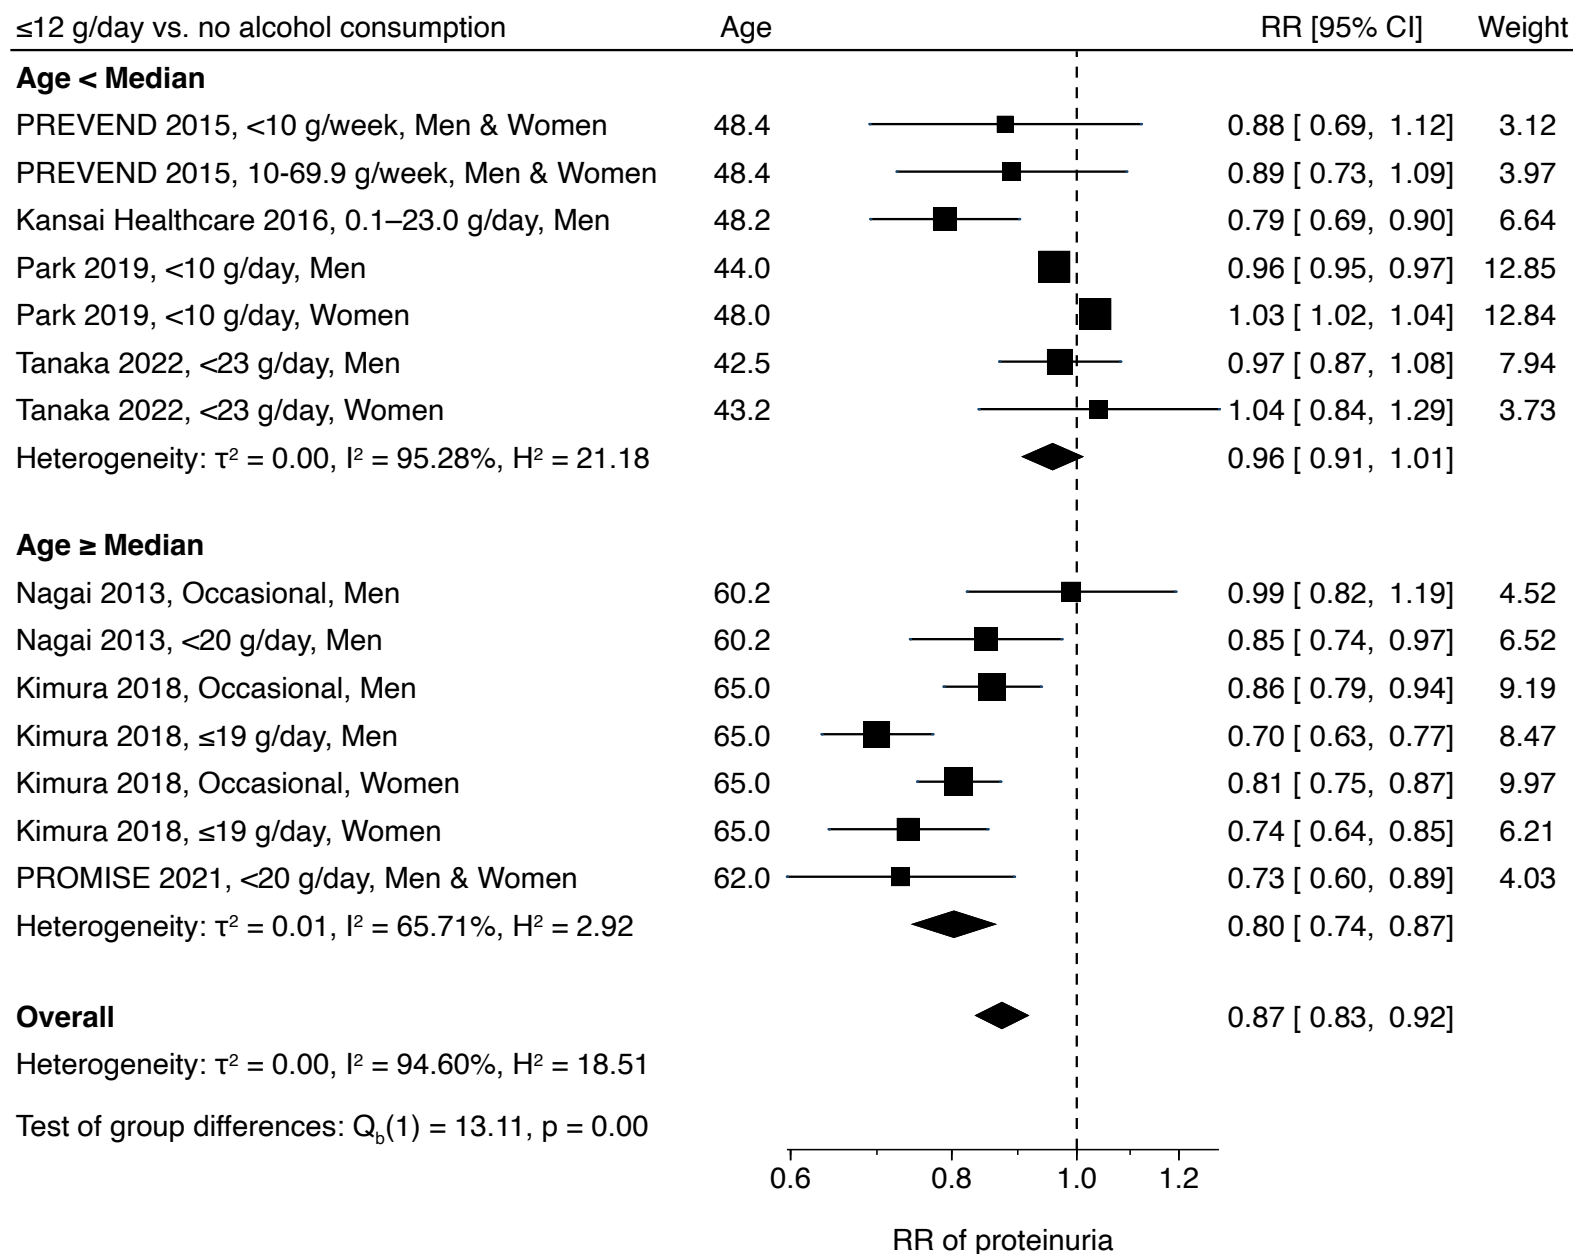

Figure S3d

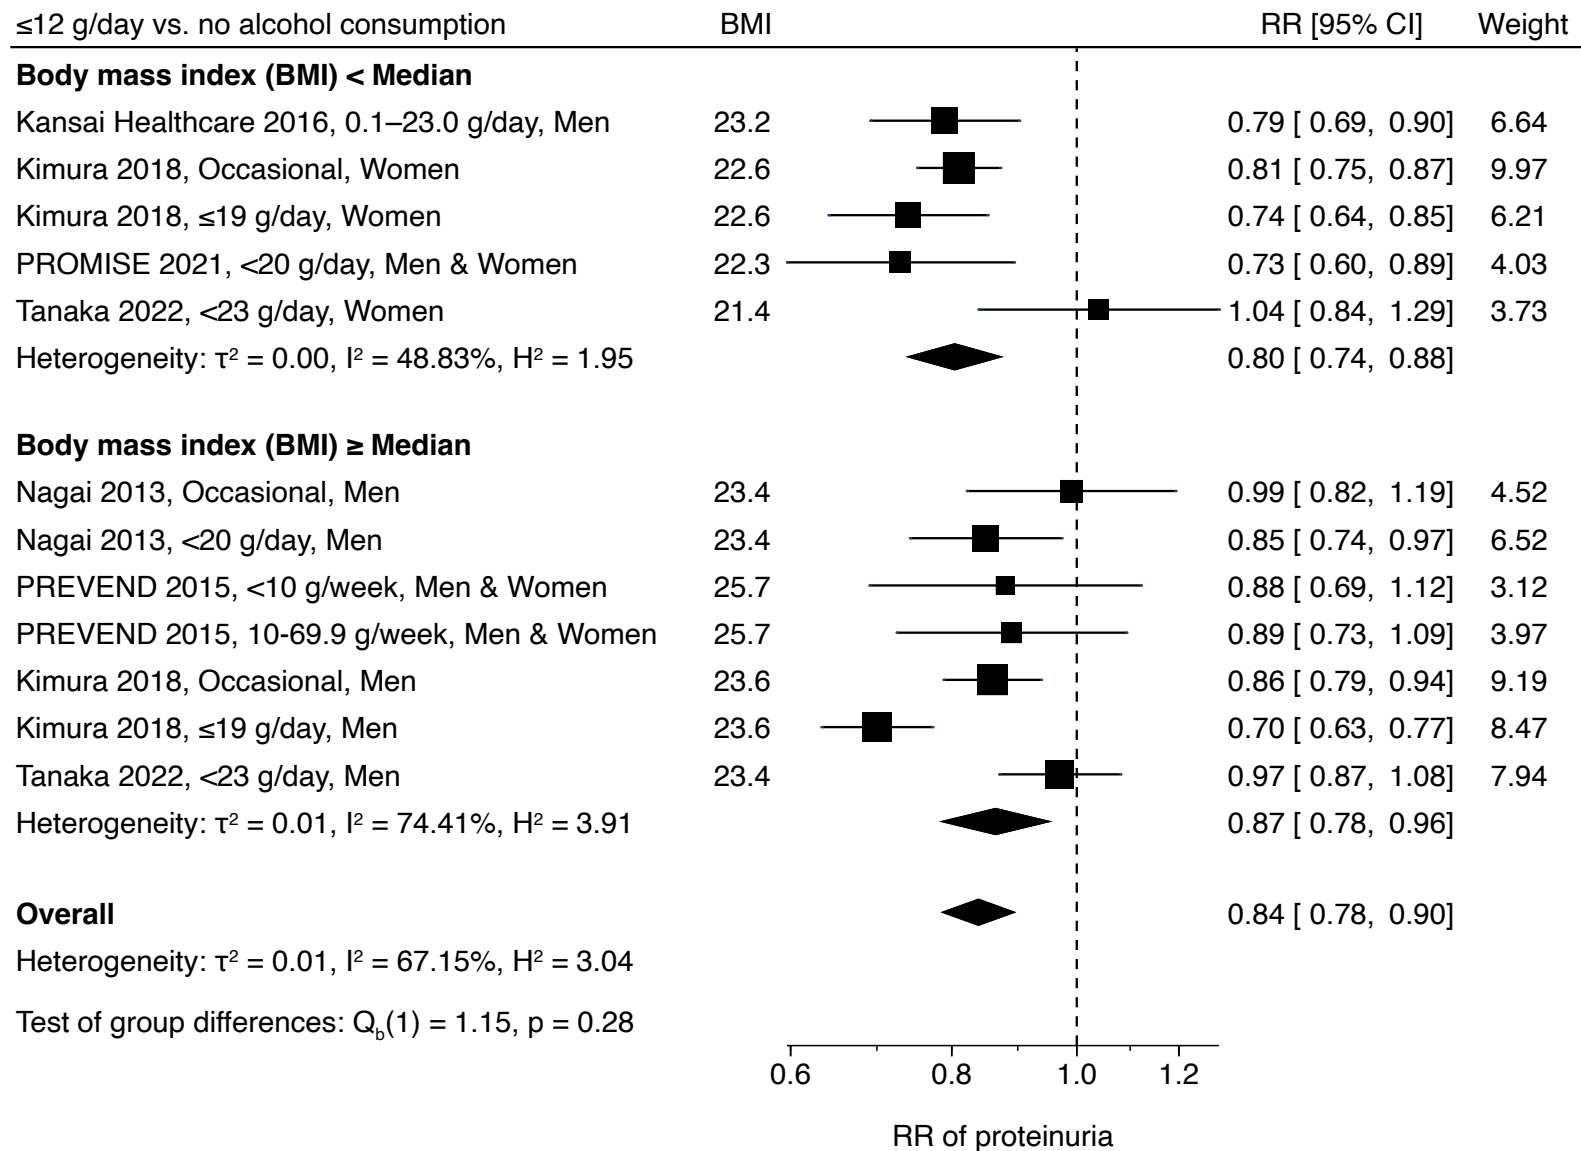

Figure S3e

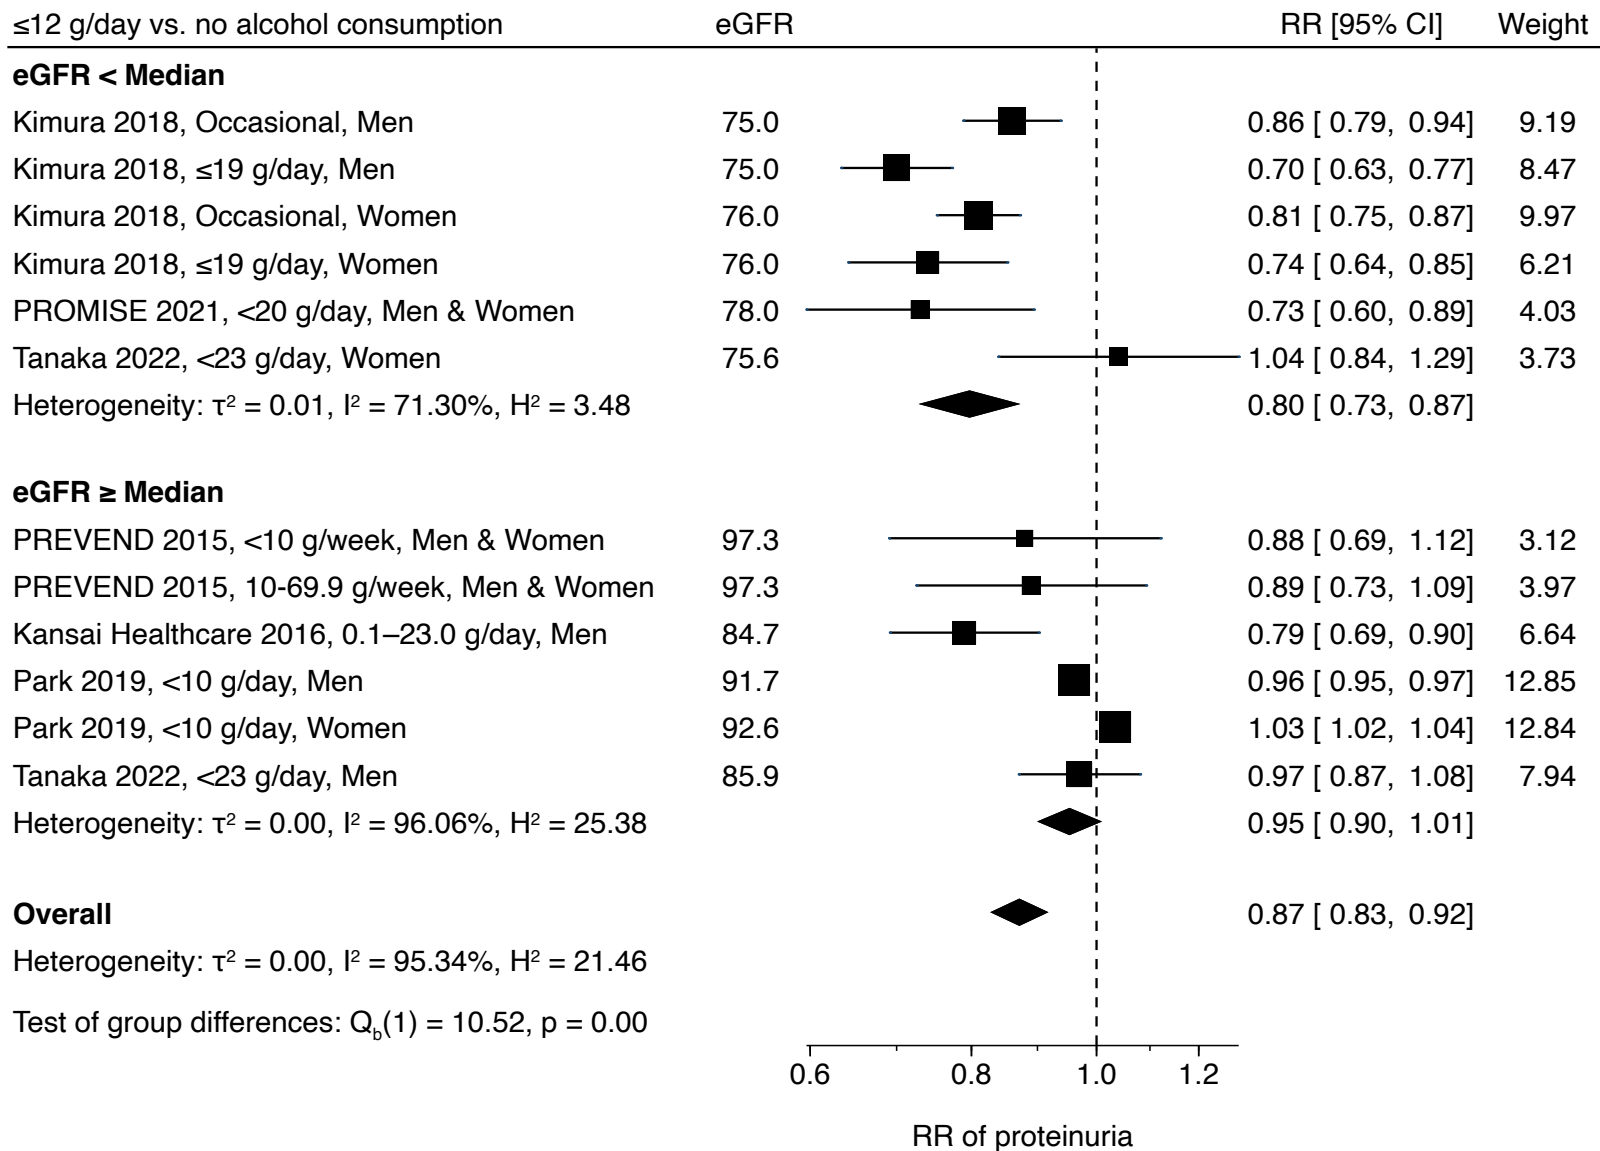

Figure S3f

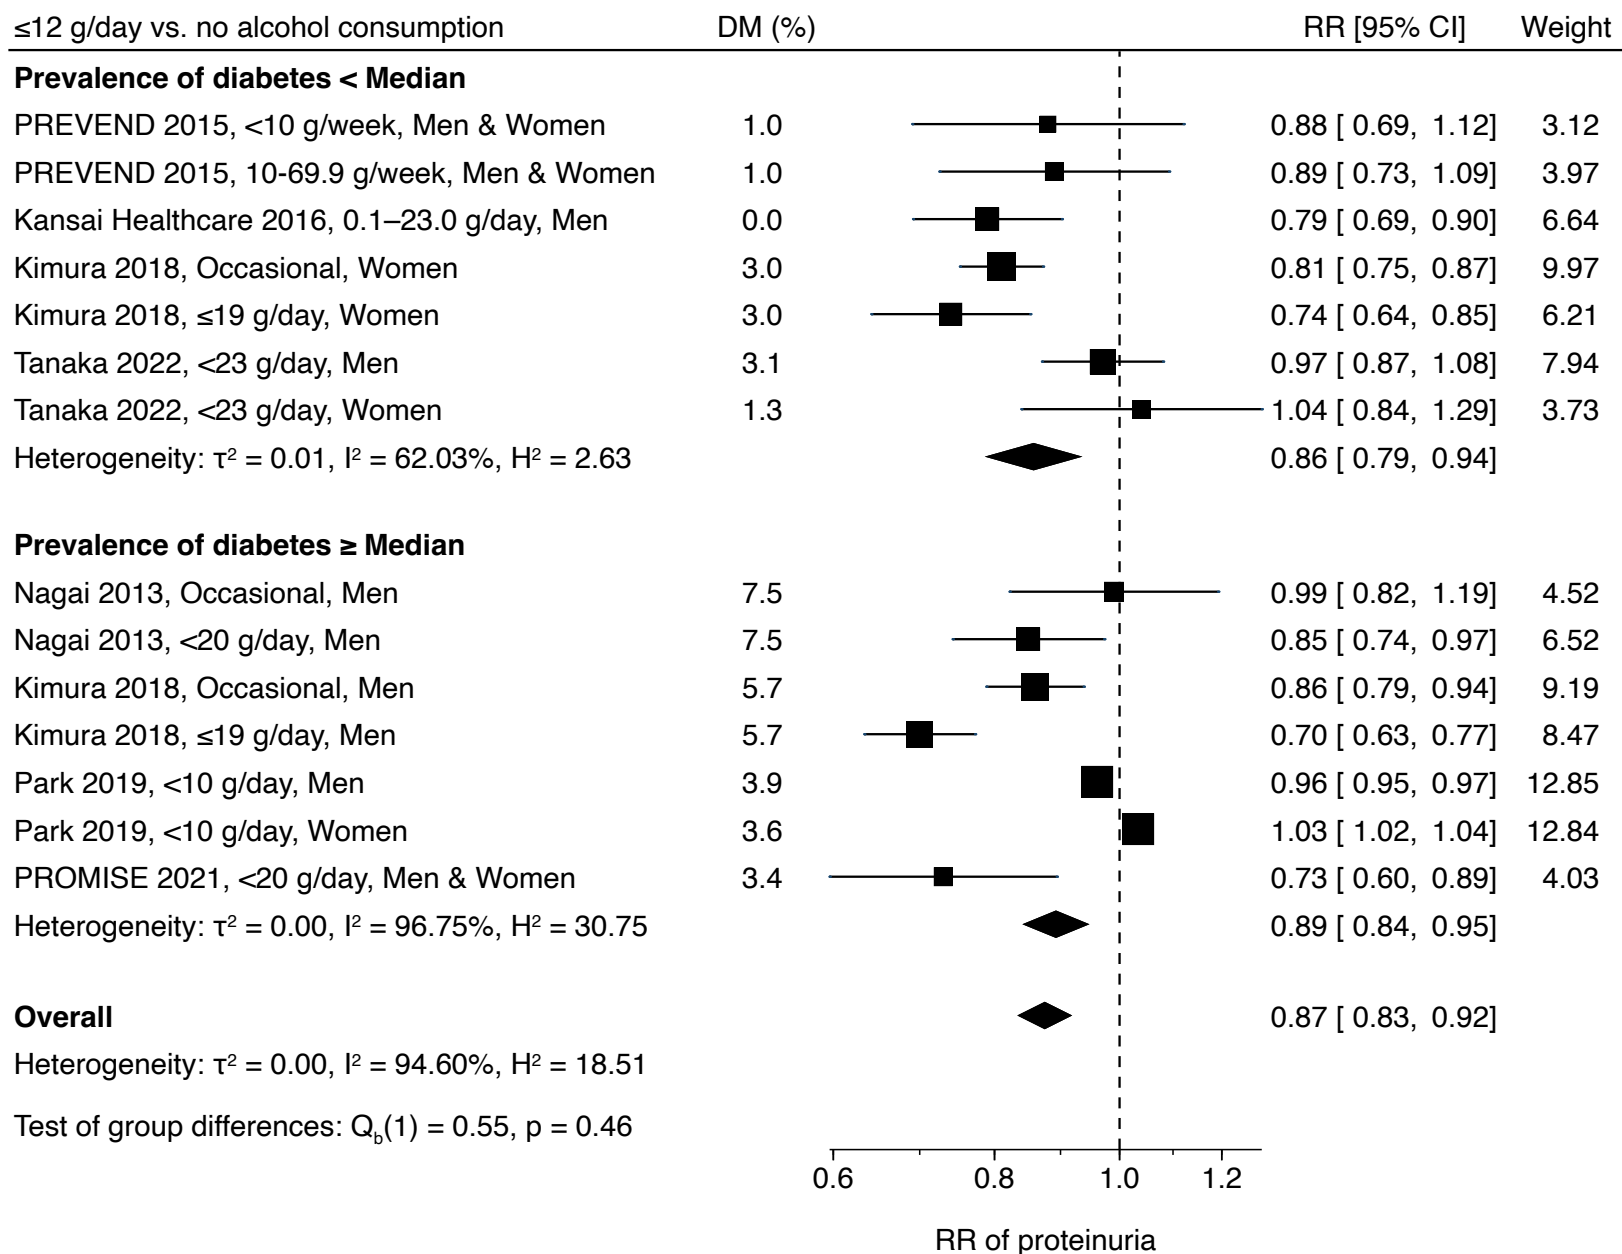

Figure S3g

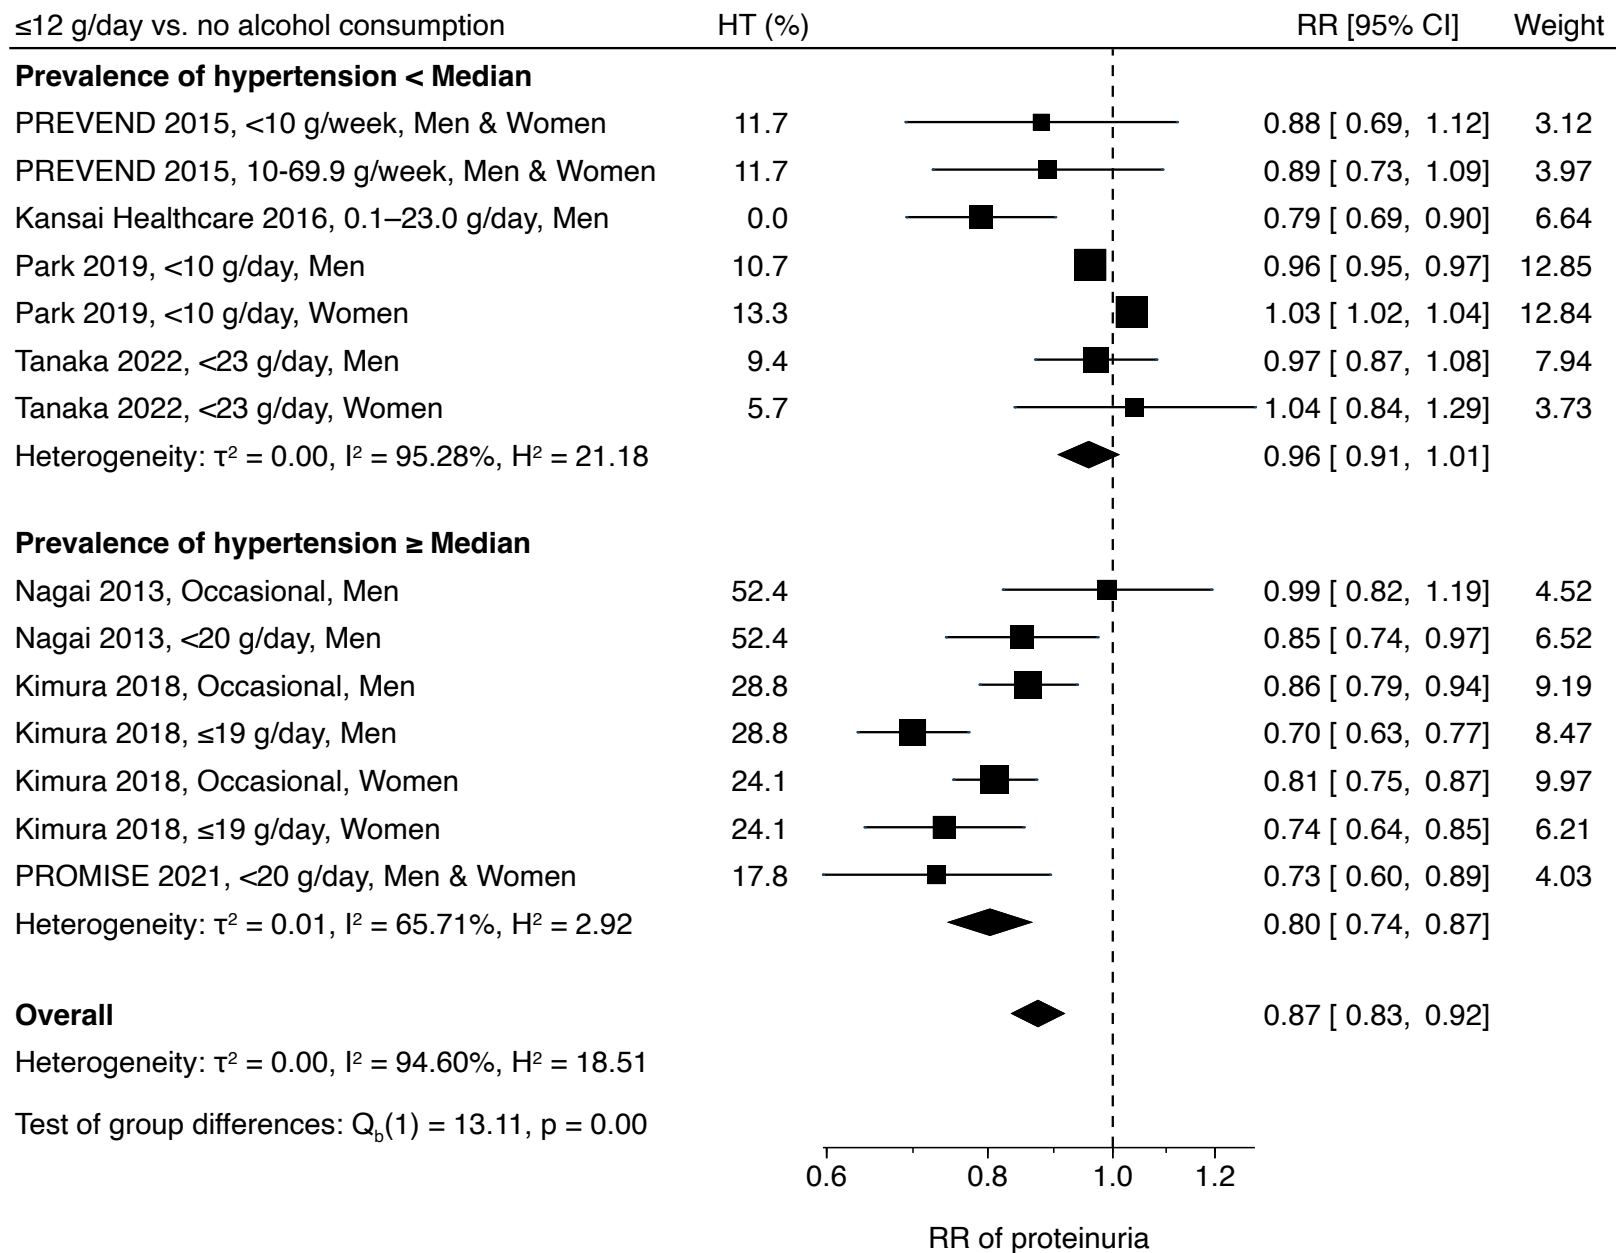

Figure S3h

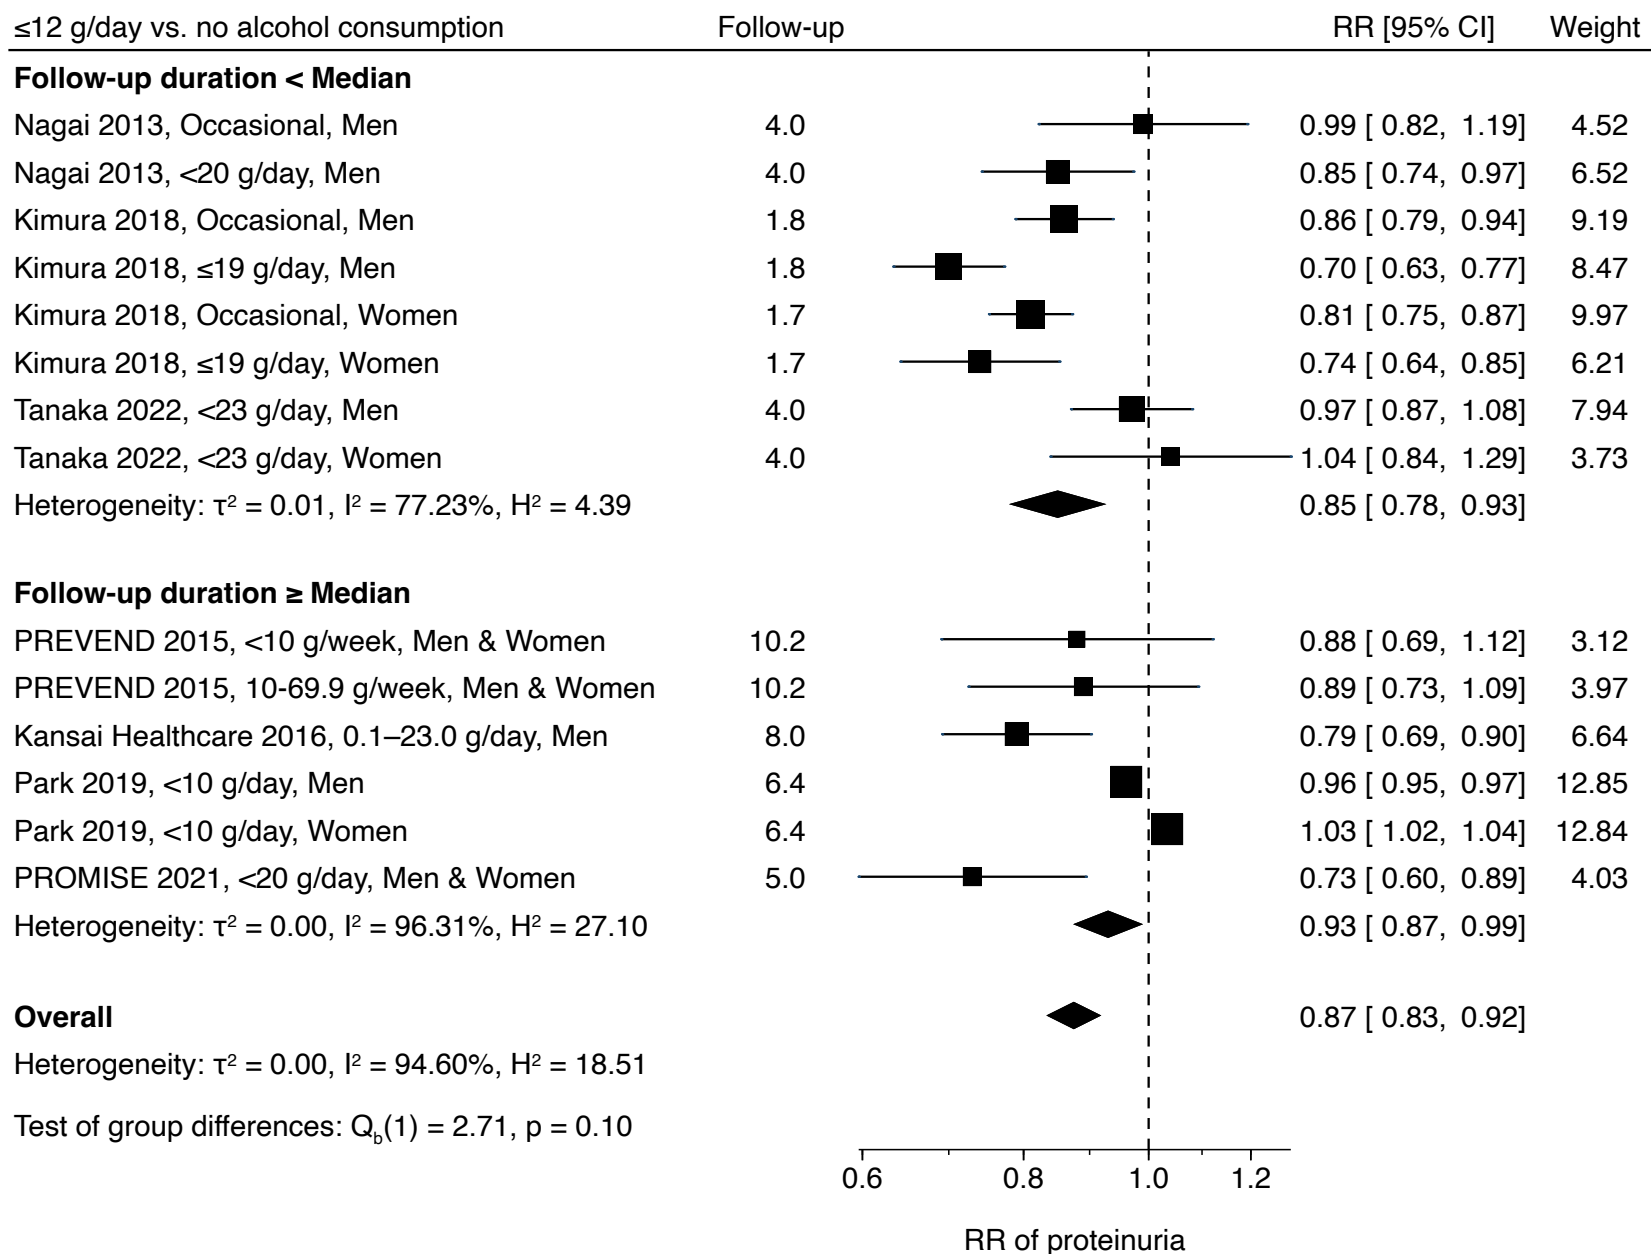



Figure S3i

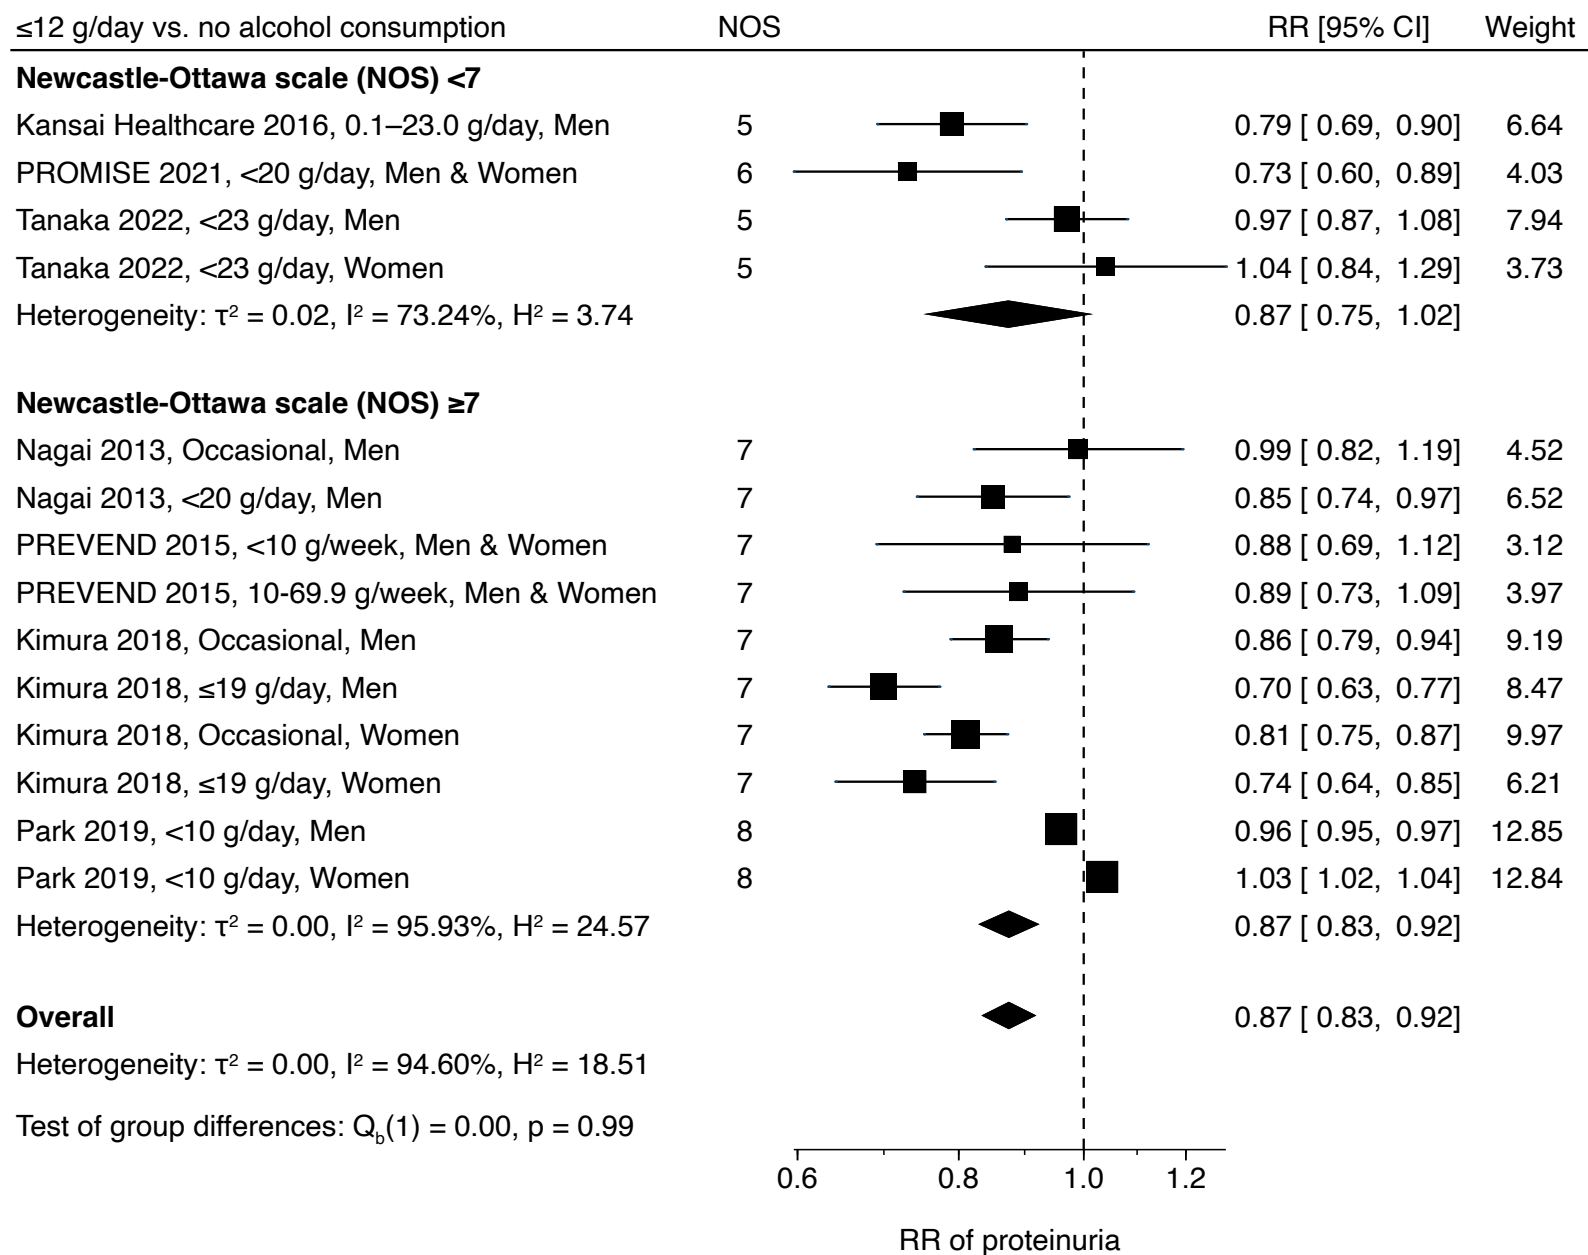

Figure S3j

 $\leq 12$  g/day vs. no alcohol consumption

RR [95% CI]

Weight

**Asian countries**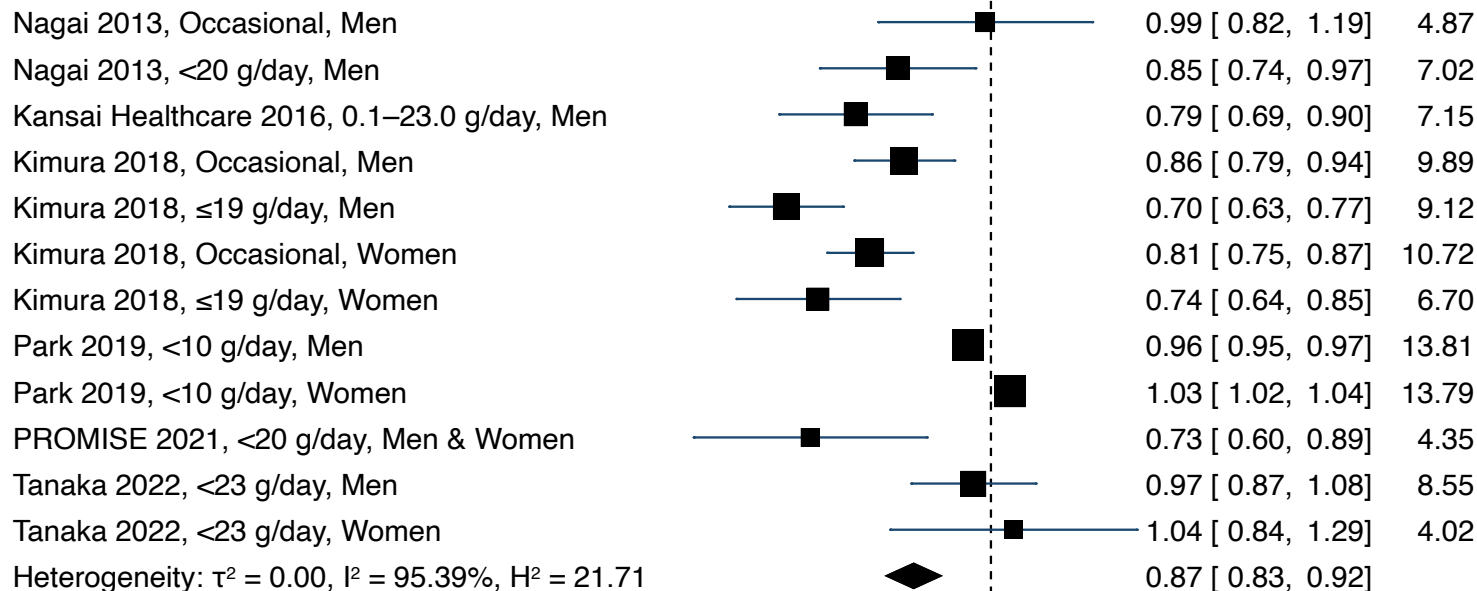

0.6

0.8

1.0

1.2

RR of proteinuria

Figure S4a

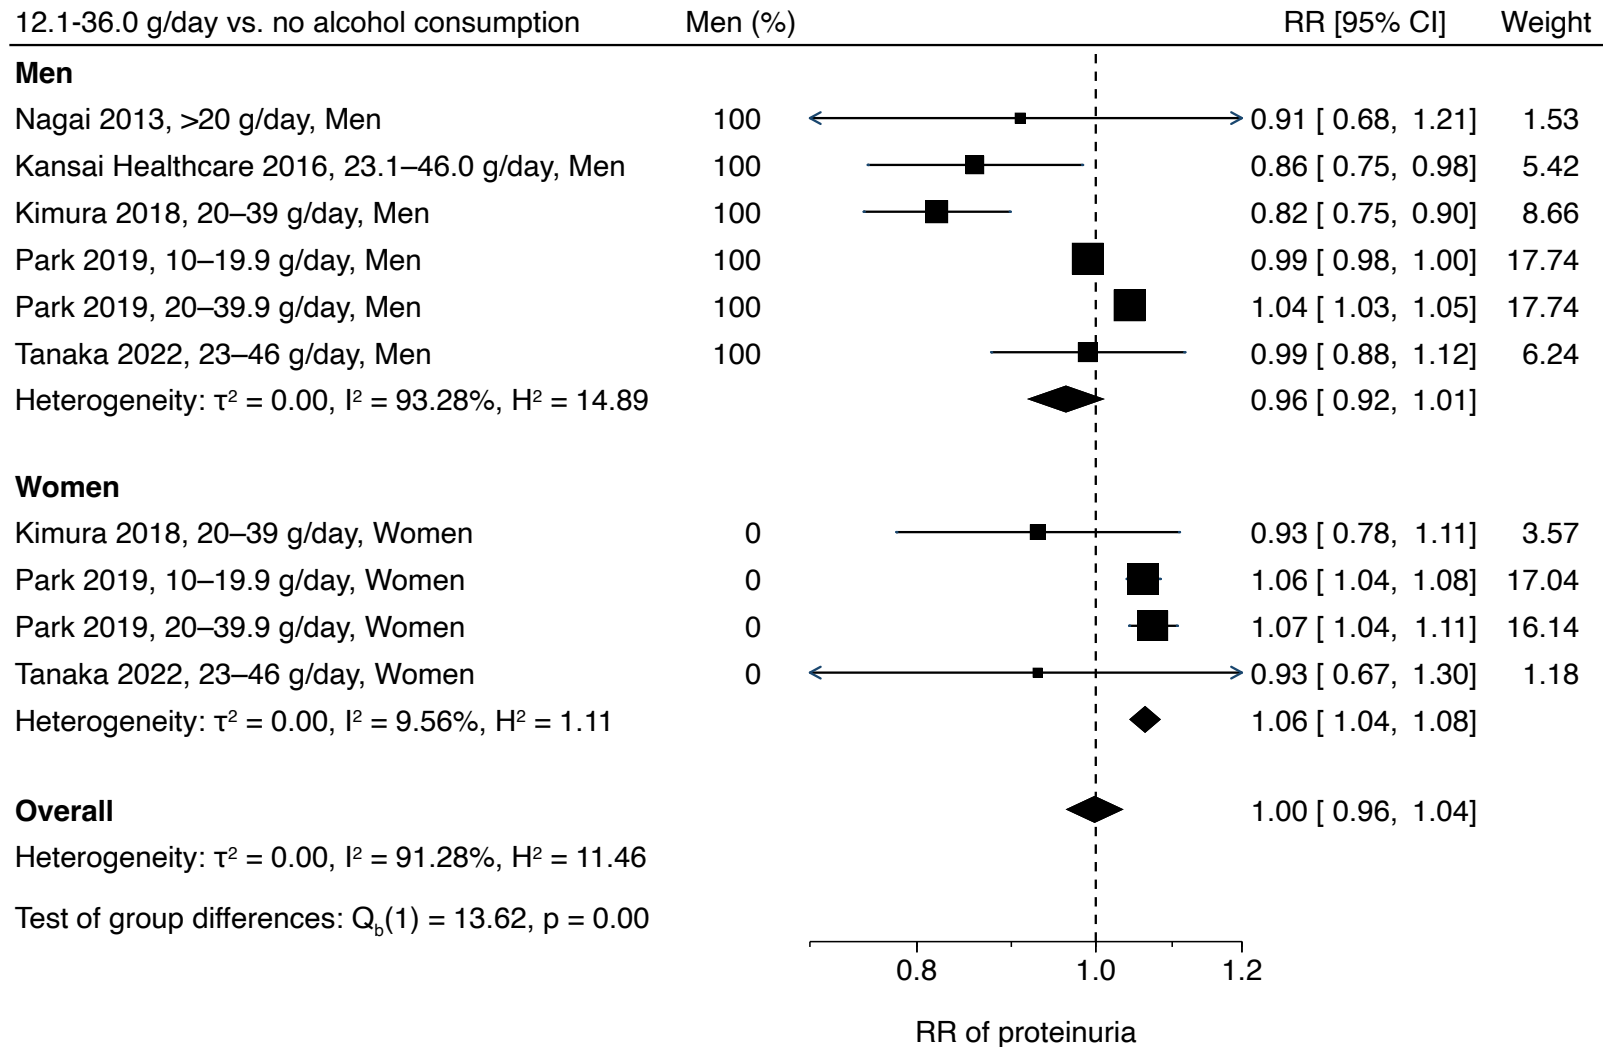

Figure S4b

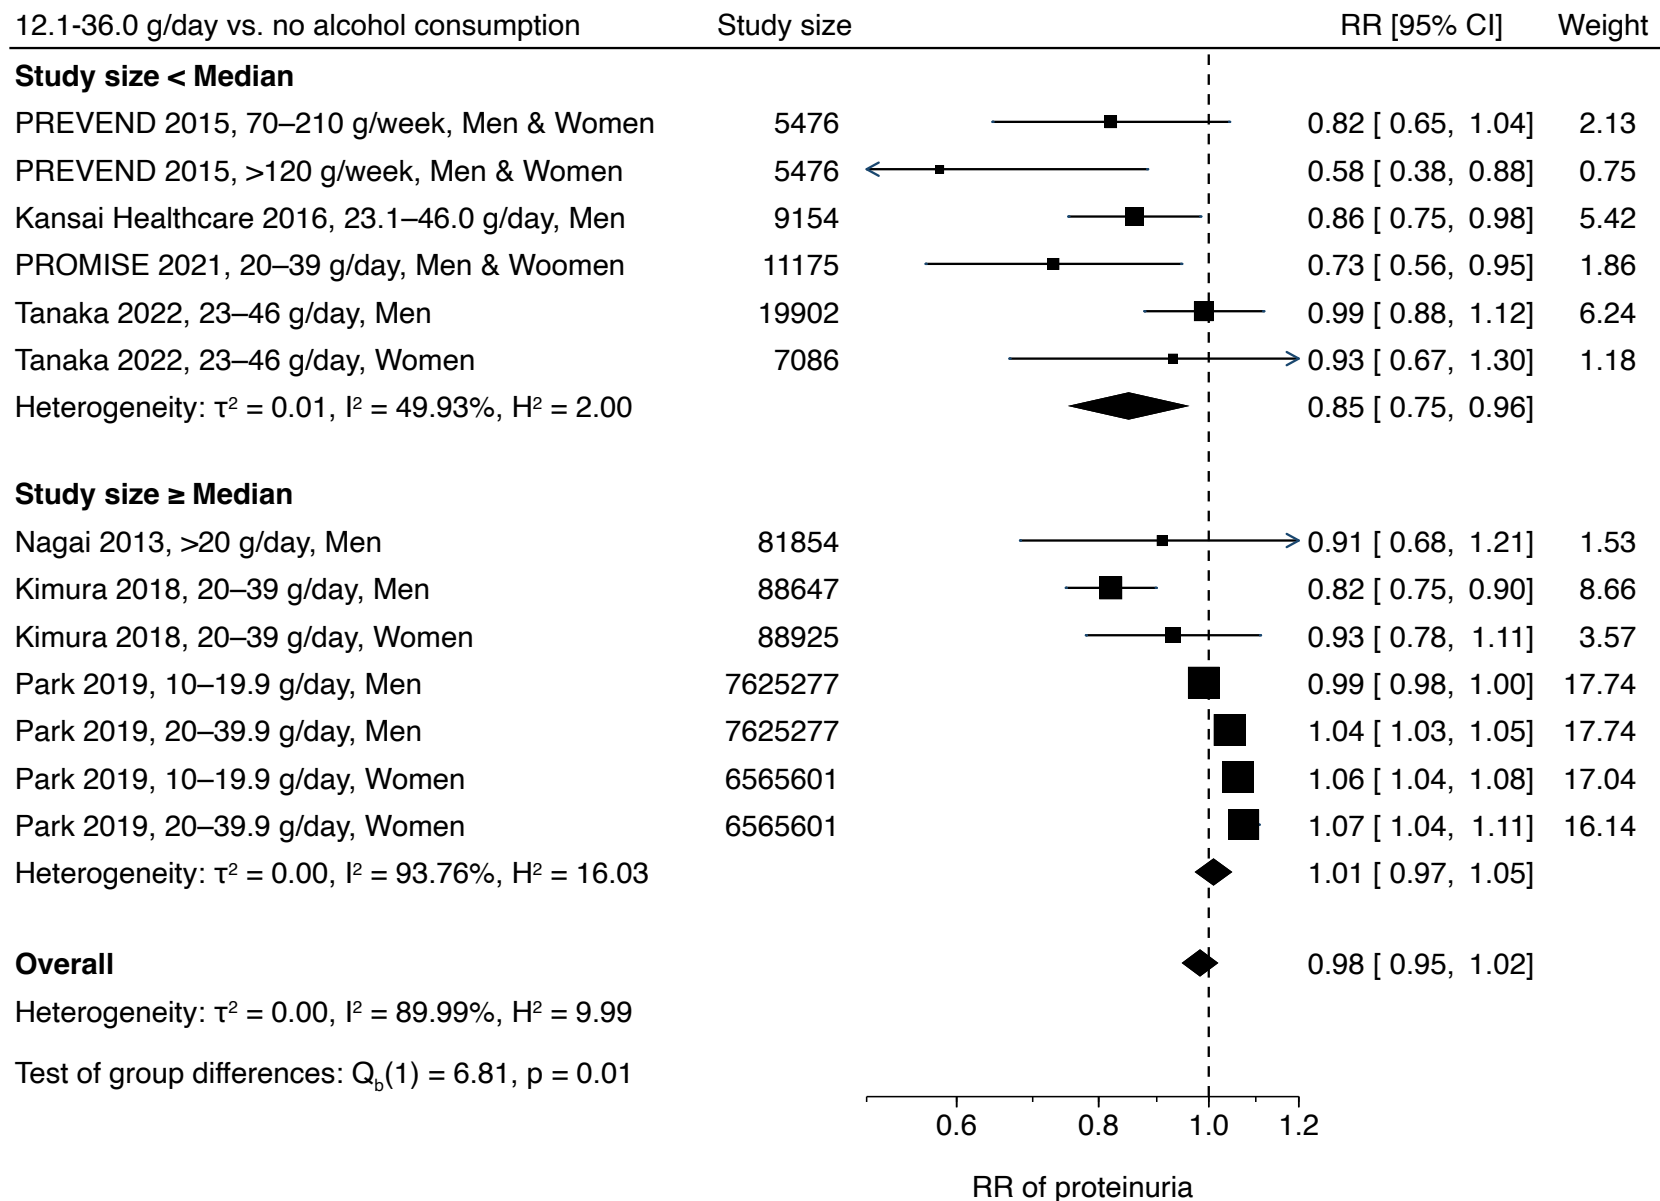

Figure S4c

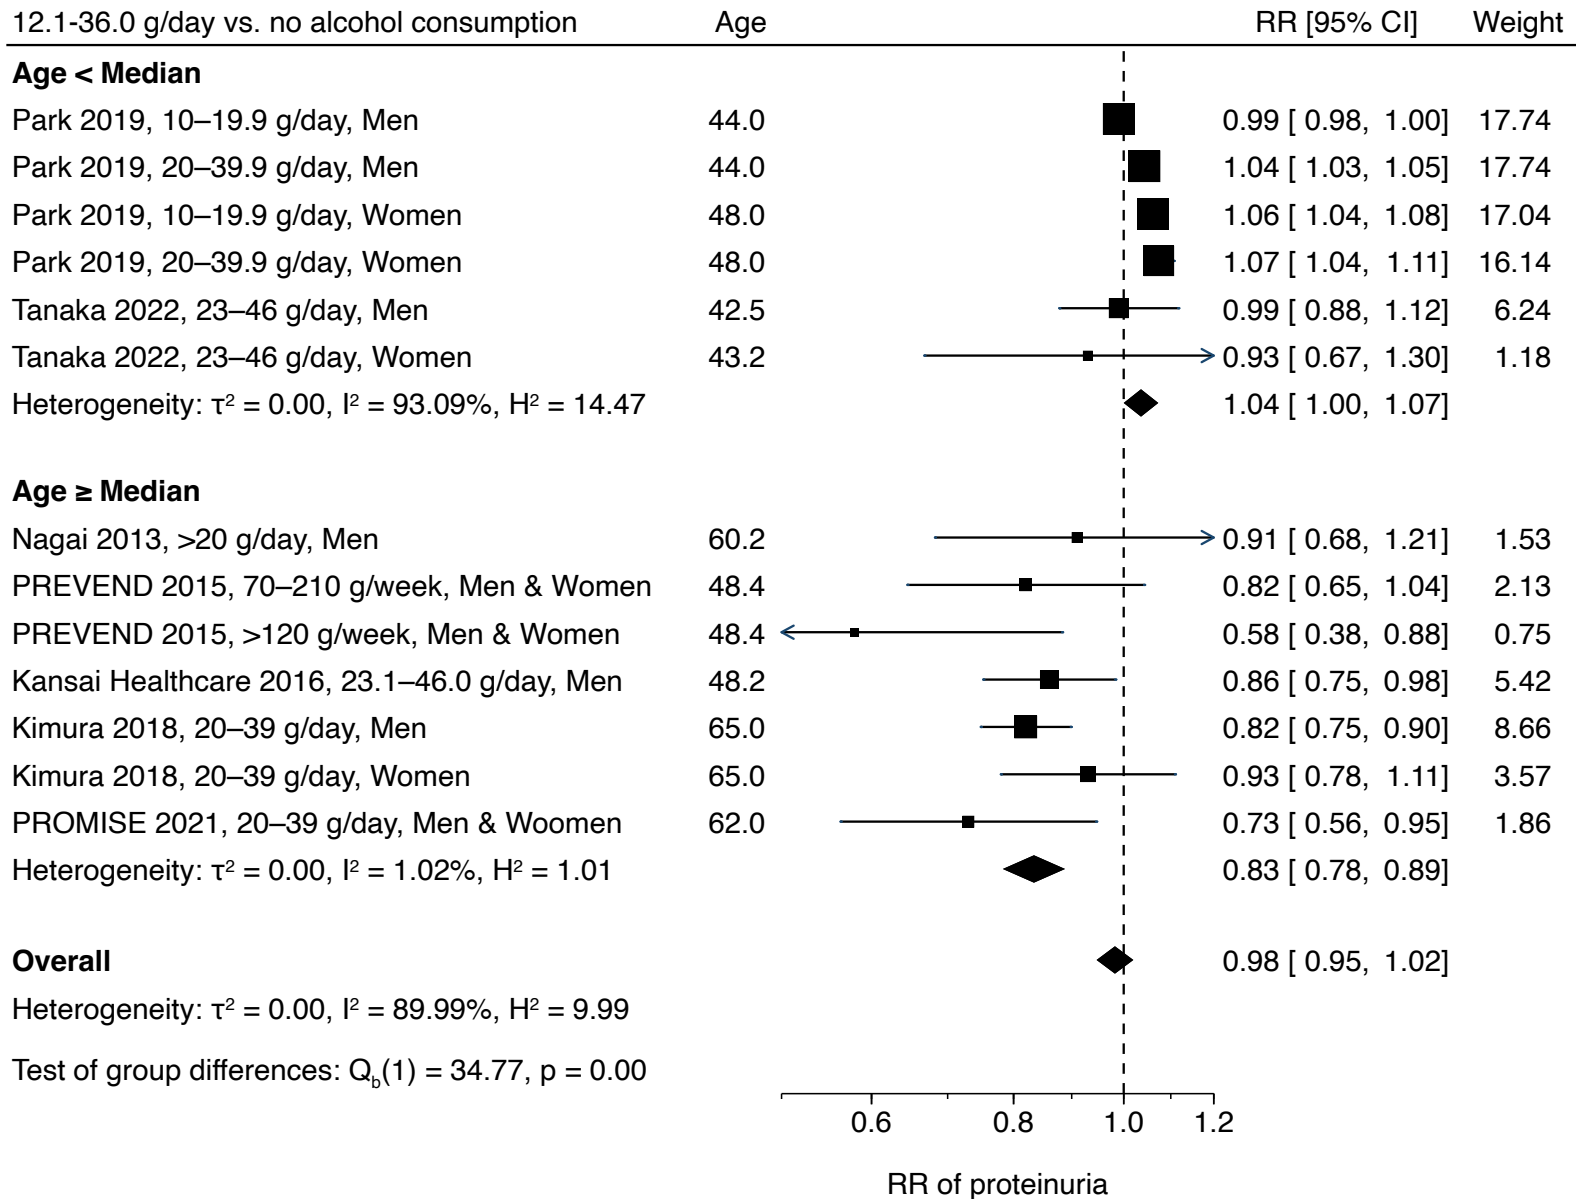

Figure S4d

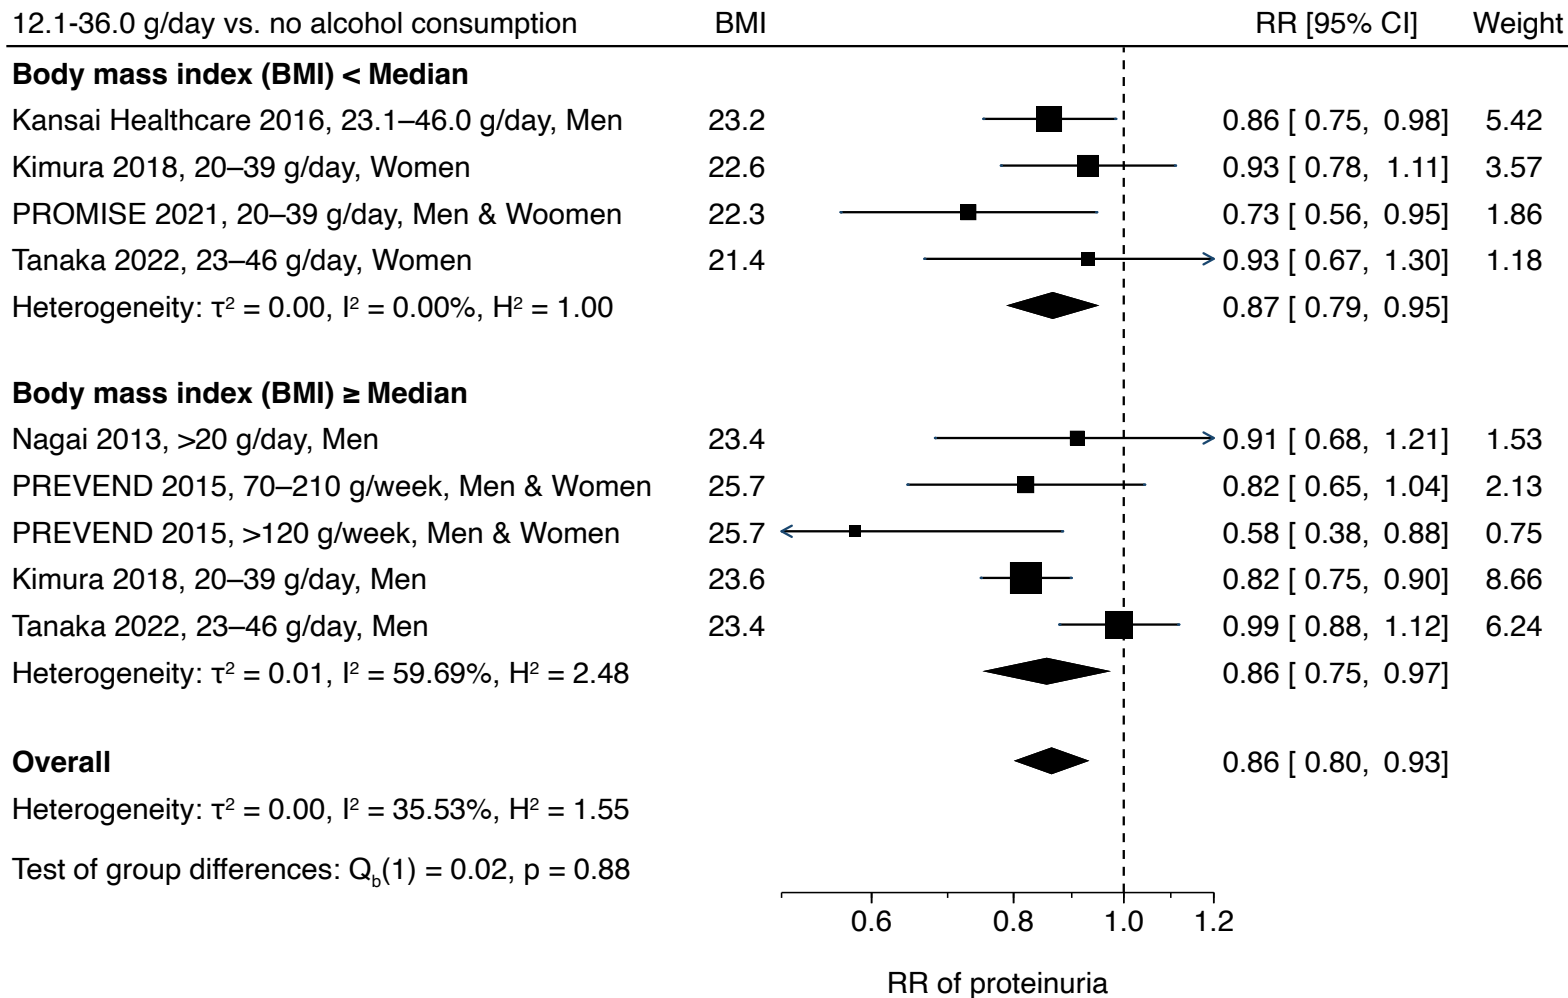

Figure S4e

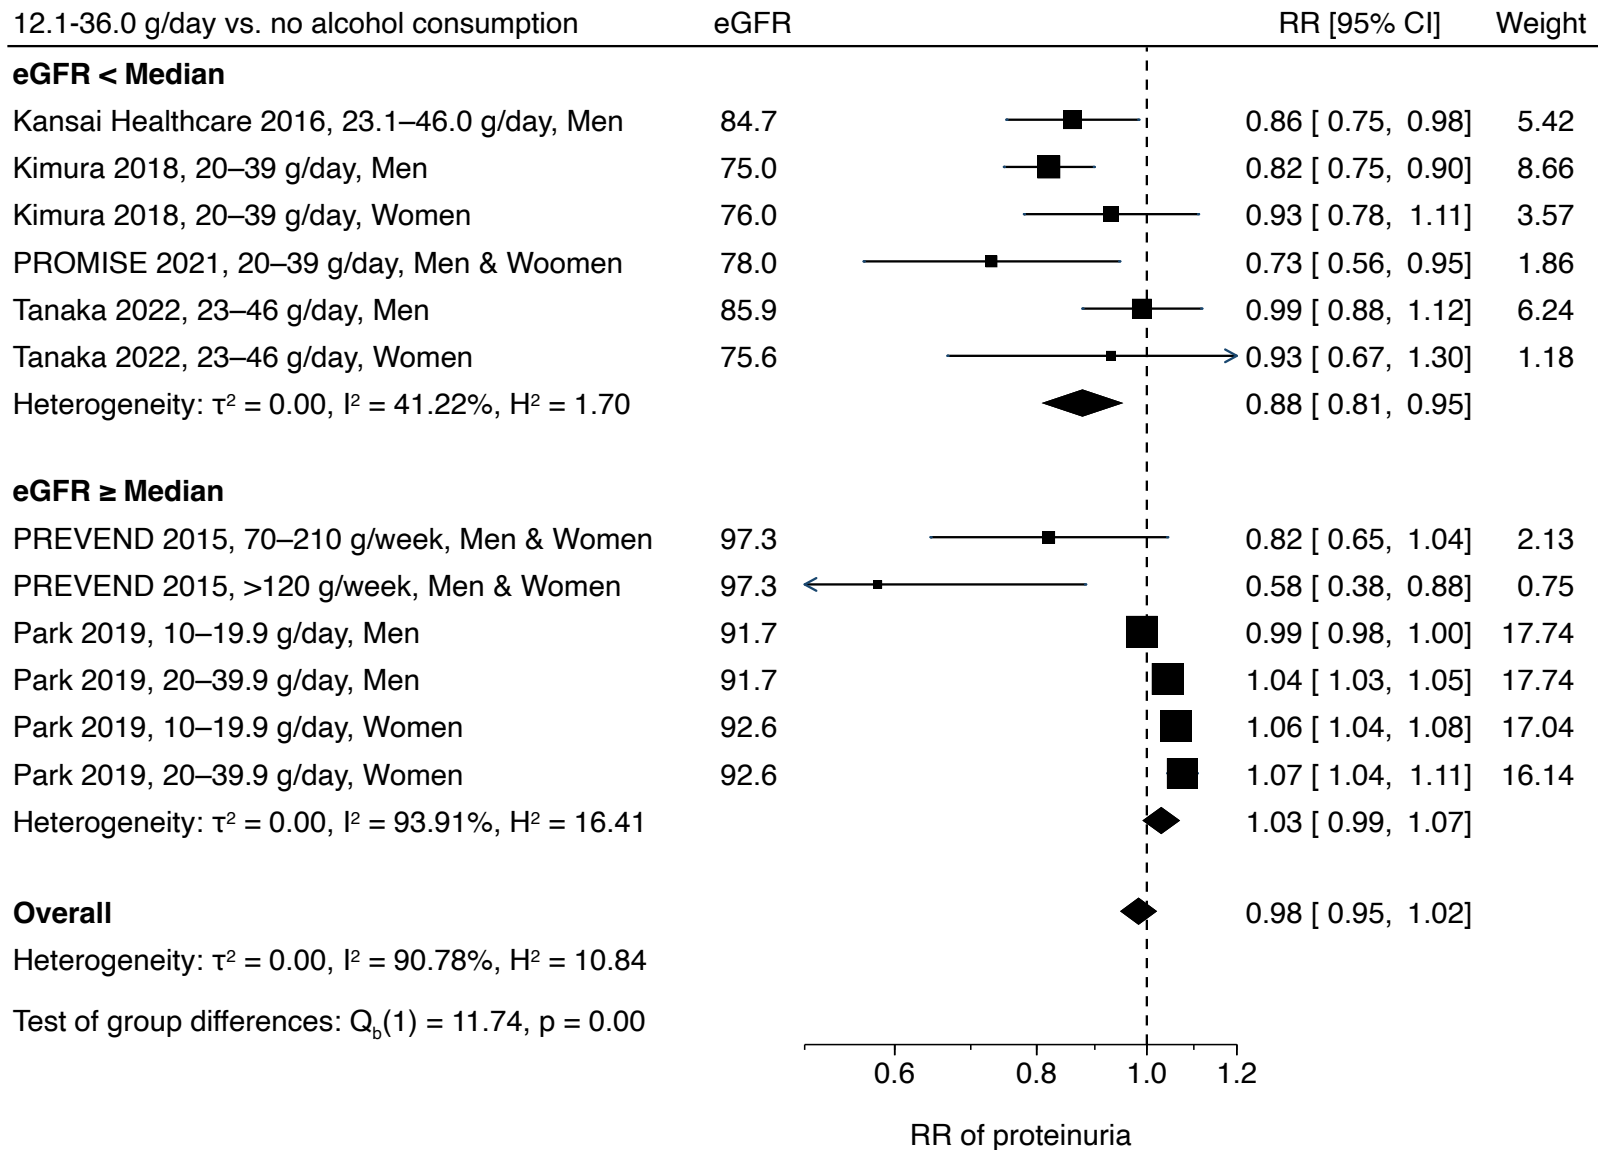

Figure S4f

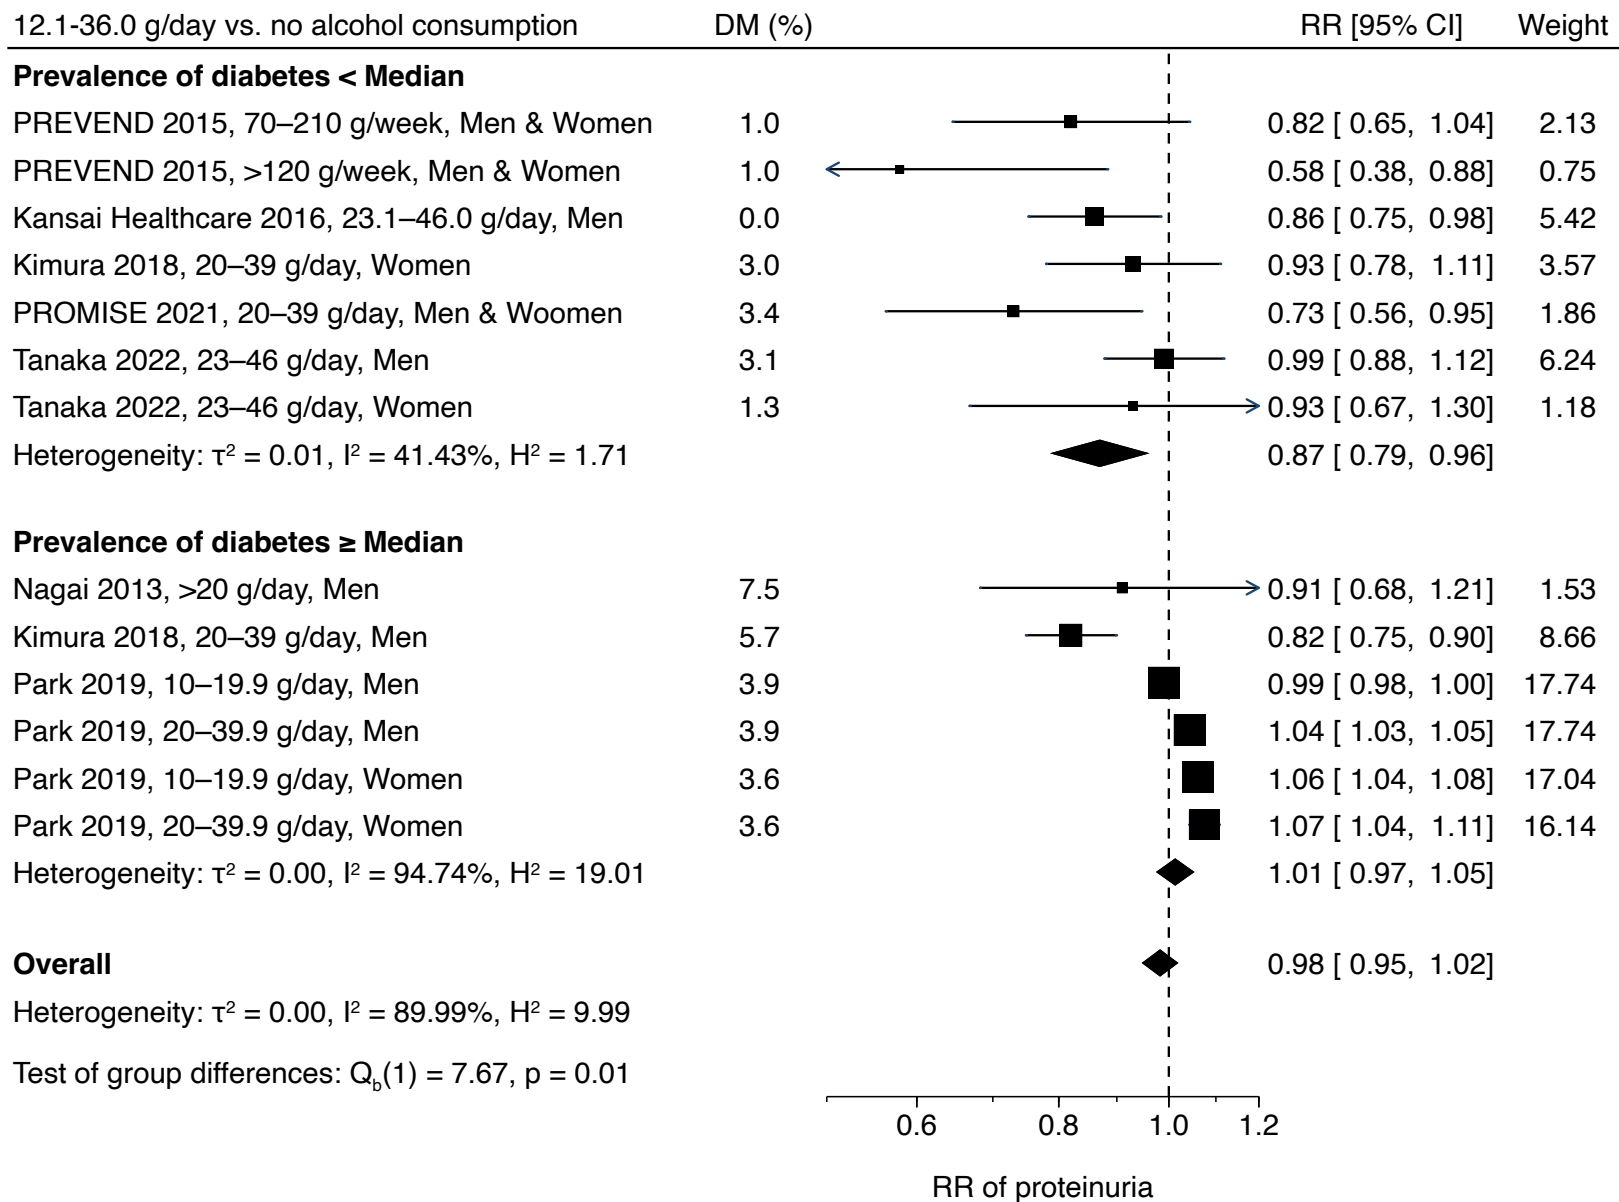



Figure S4g

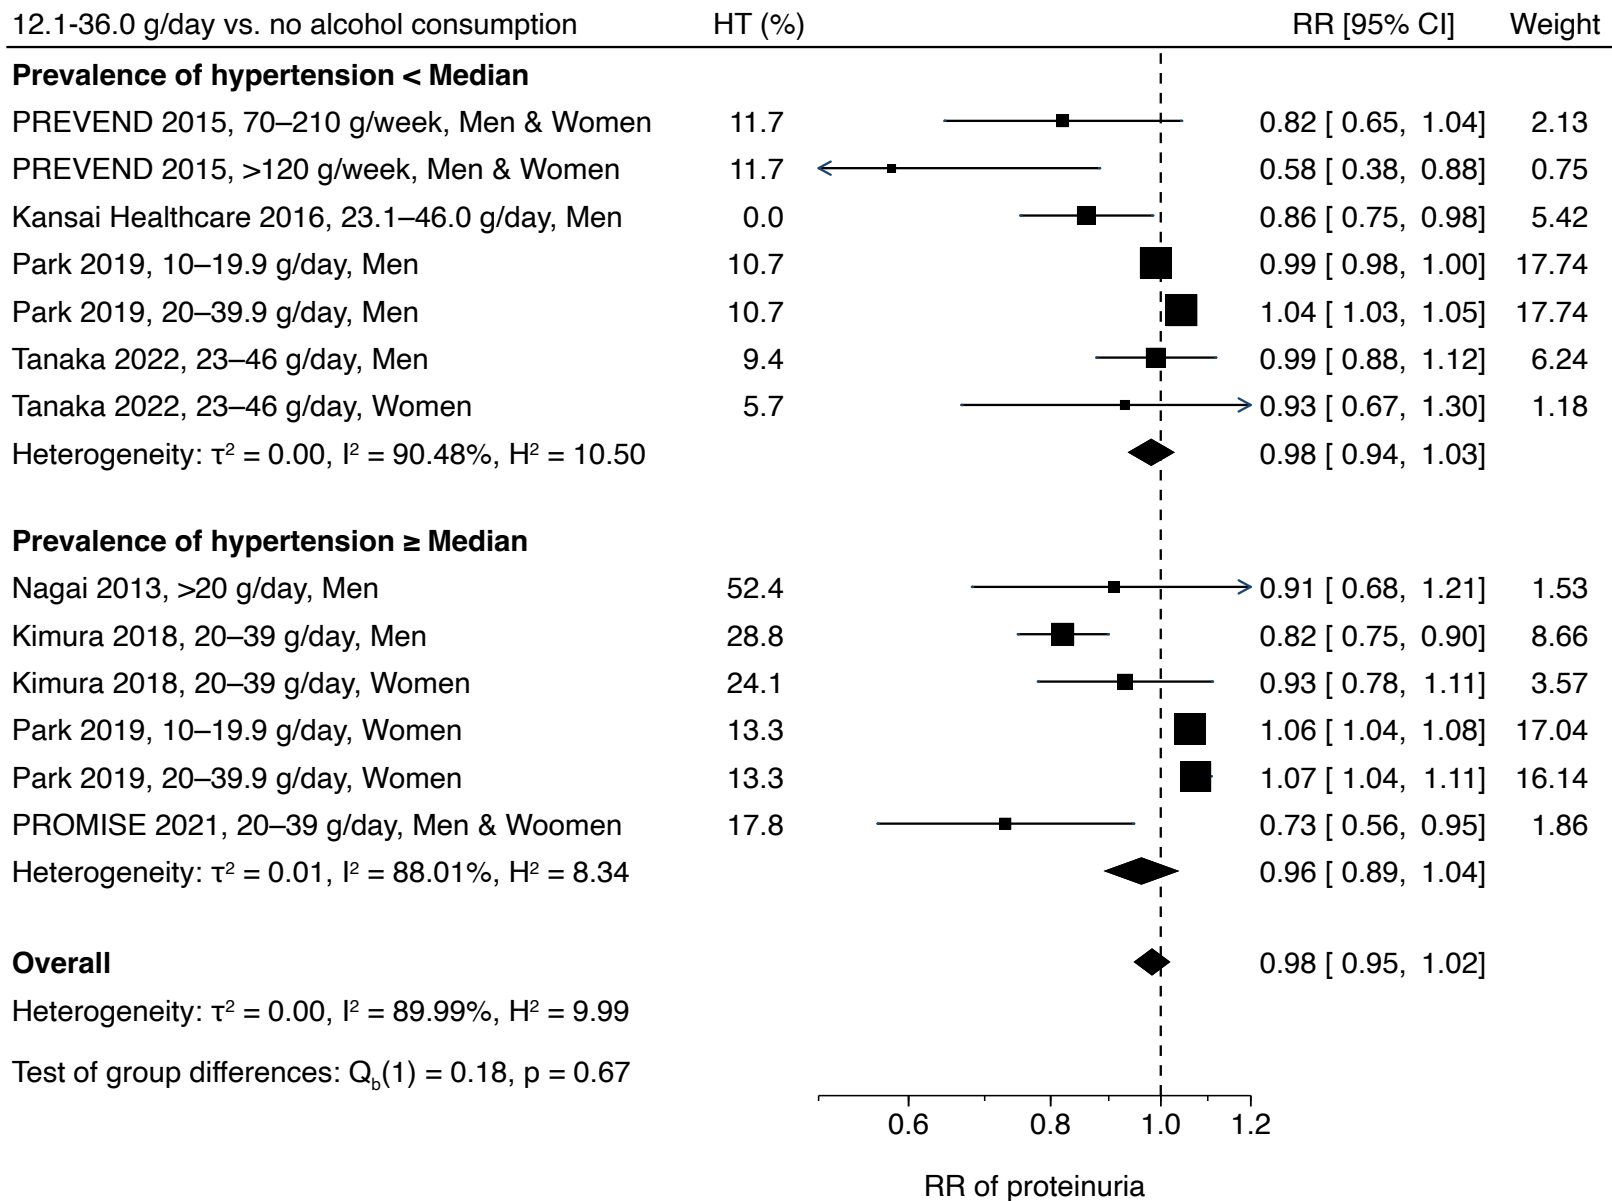

Figure S4h

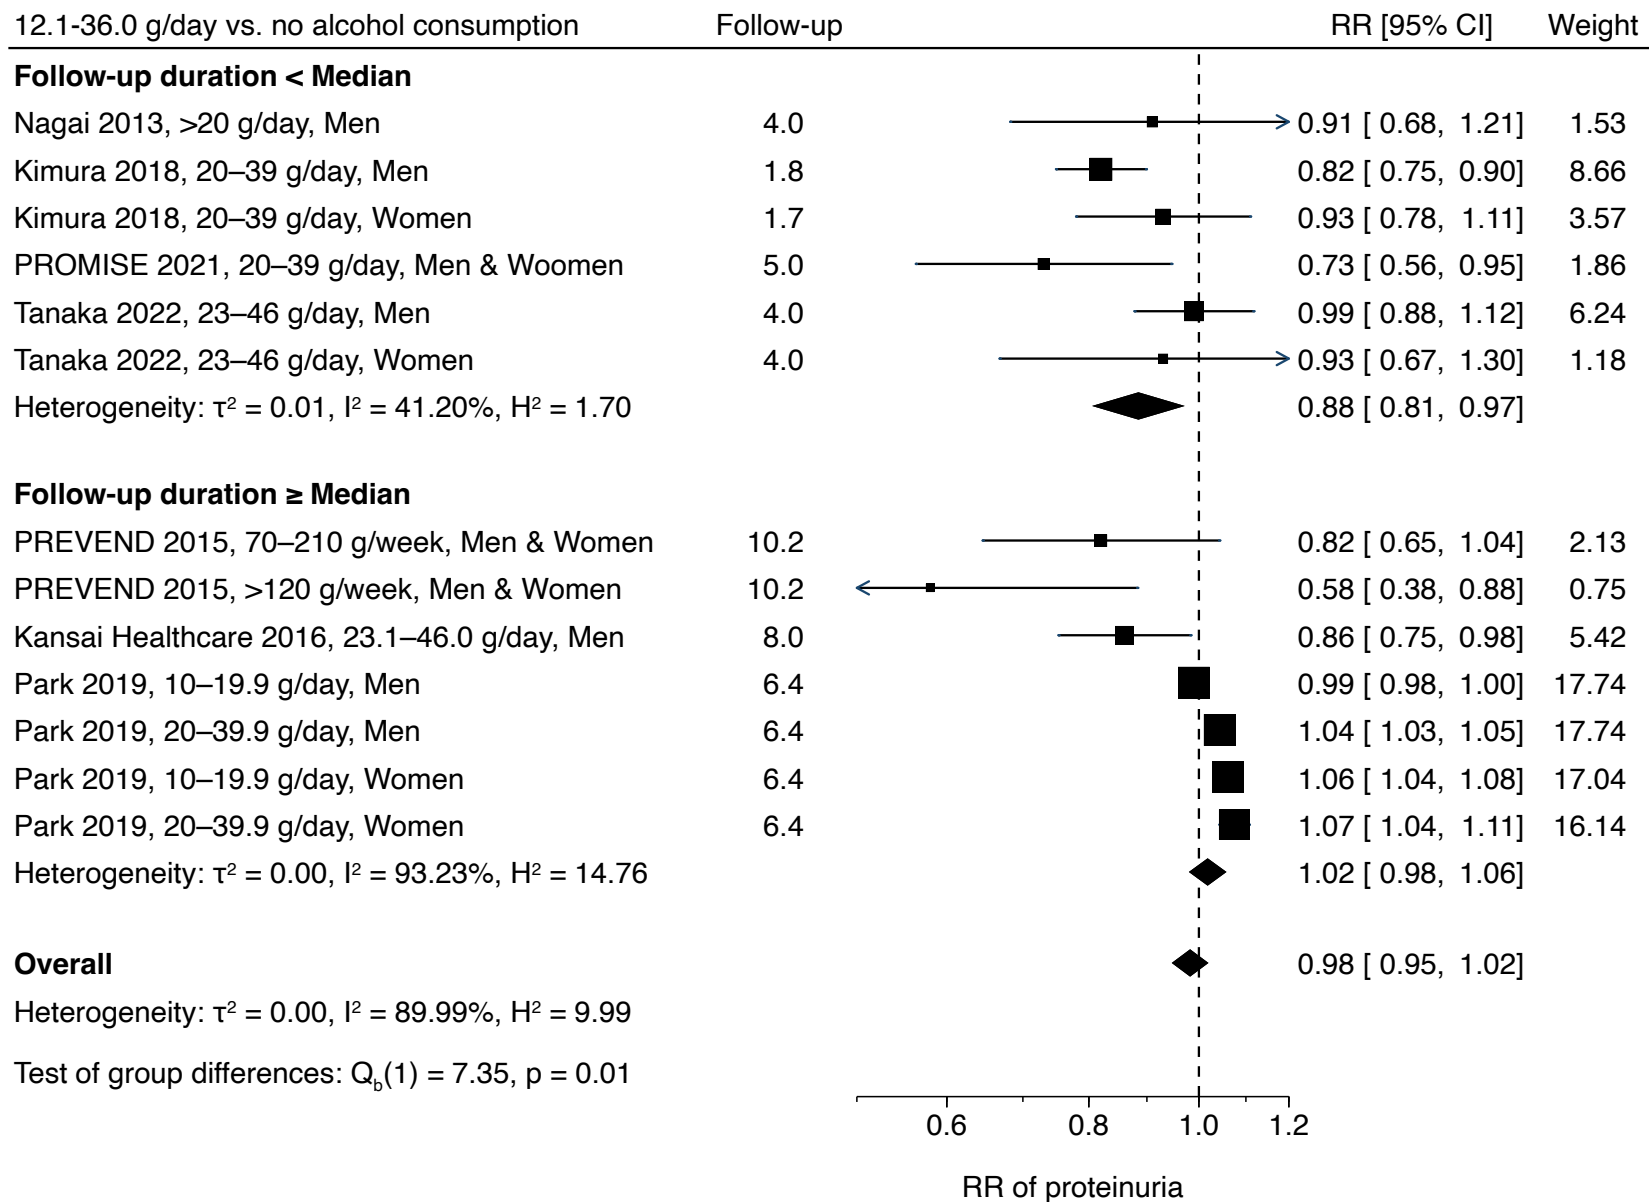

Figure S4i

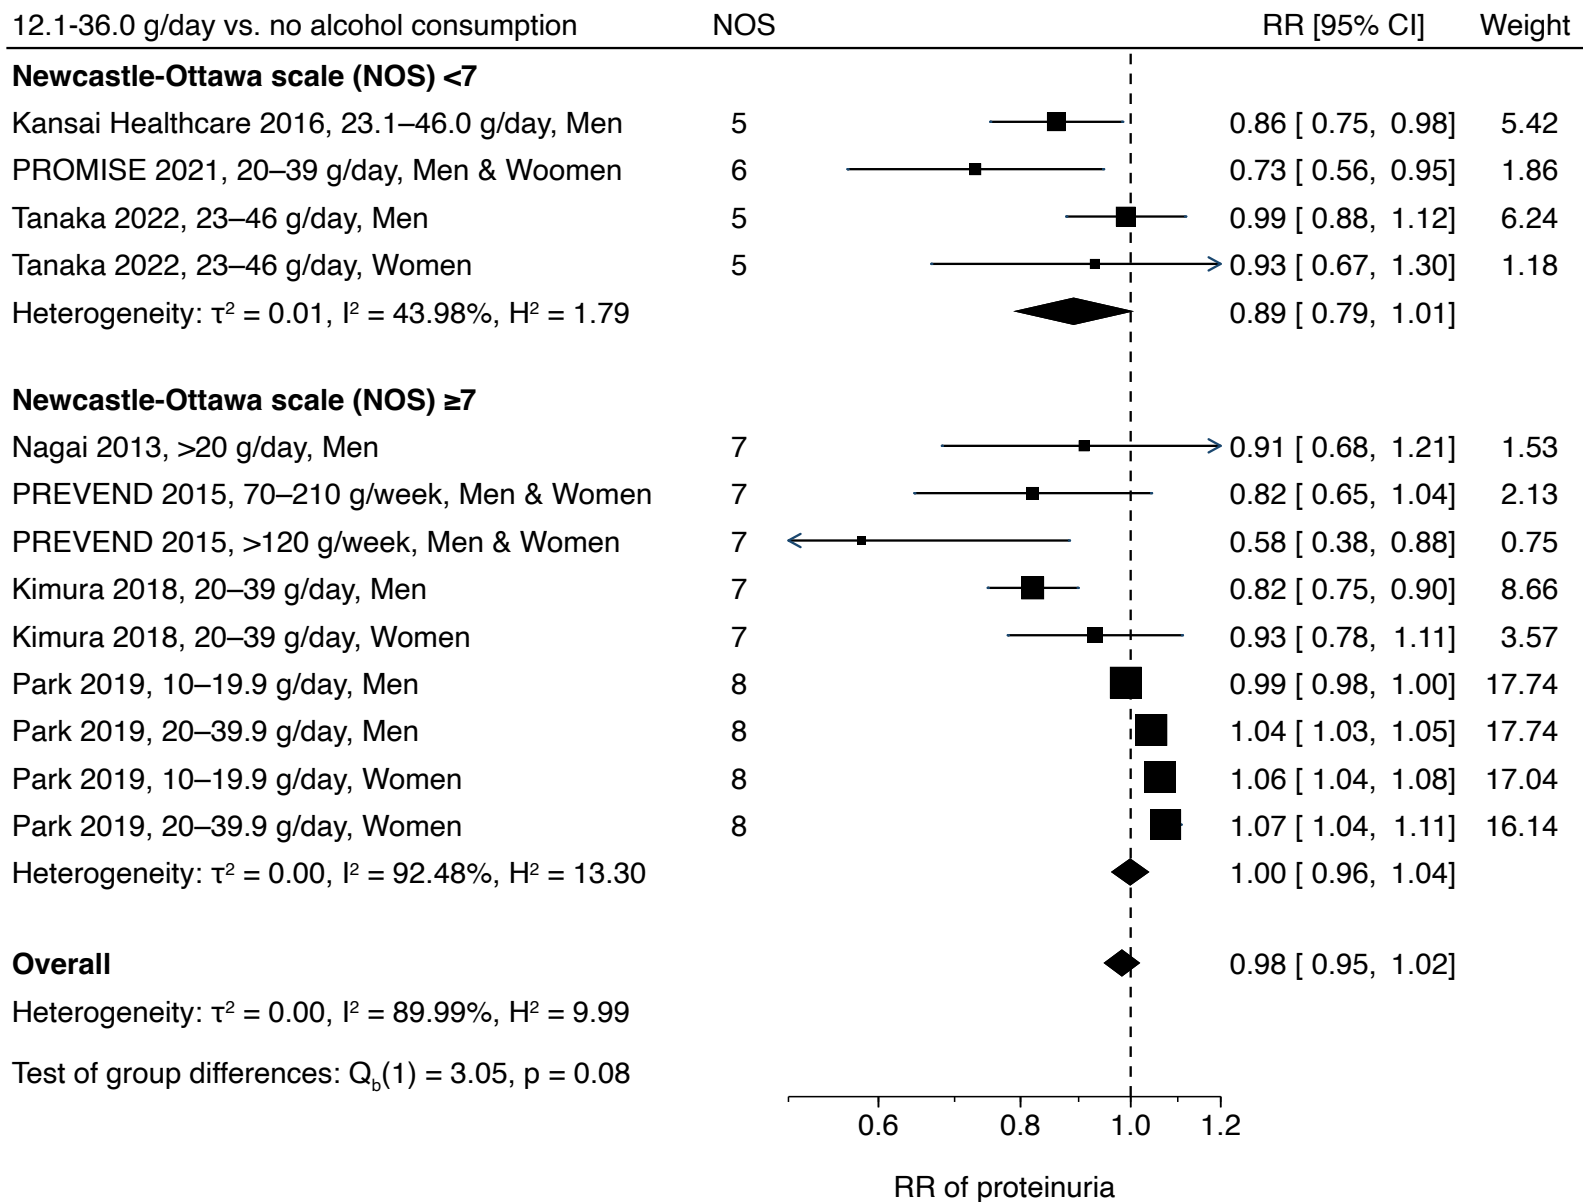

Figure S4j

12.1-36.0 g/day vs. no alcohol consumption

RR [95% CI]      Weight

**Asian countries**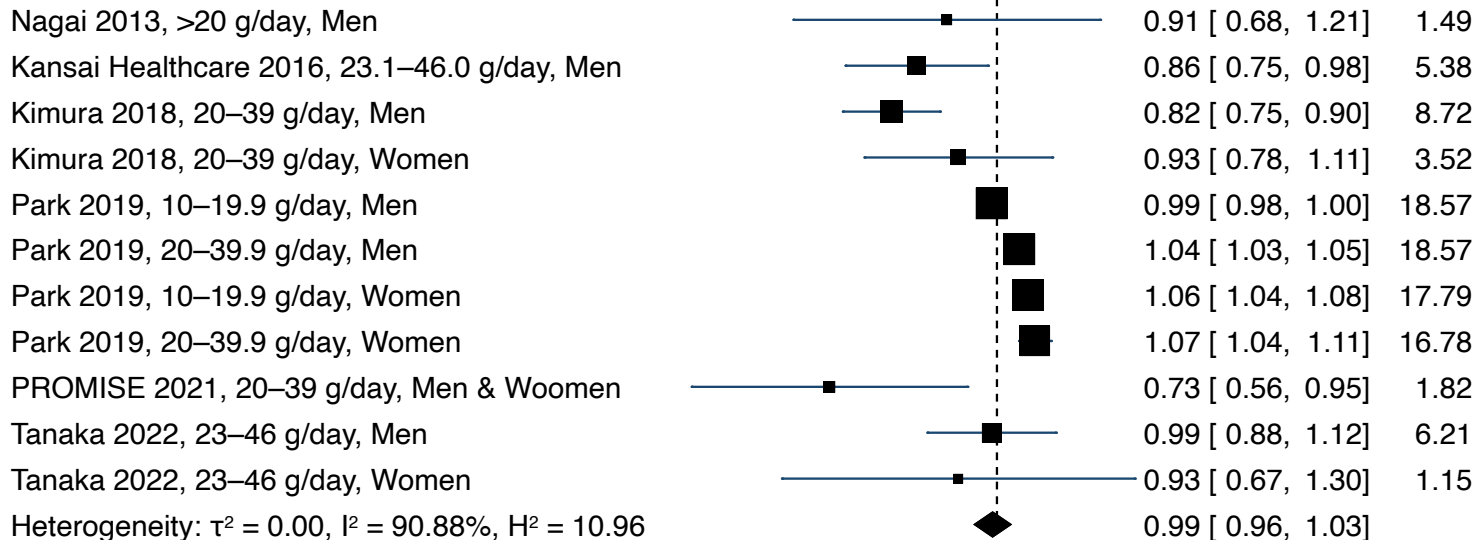

0.6      0.8      1.0      1.2

RR of proteinuria

Figure S5a

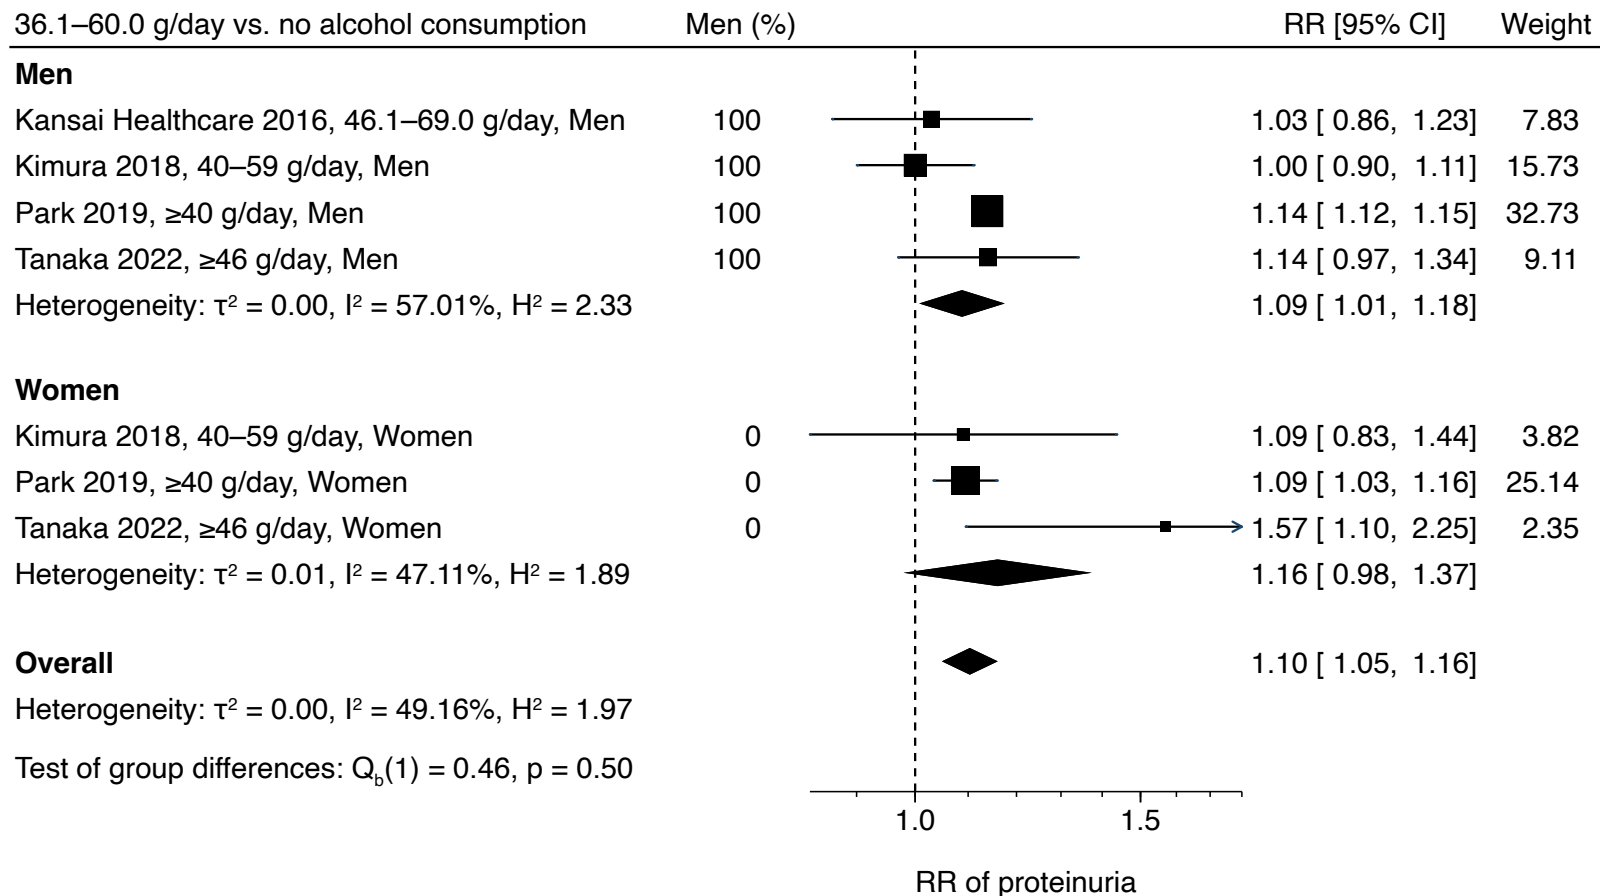

Figure S5b

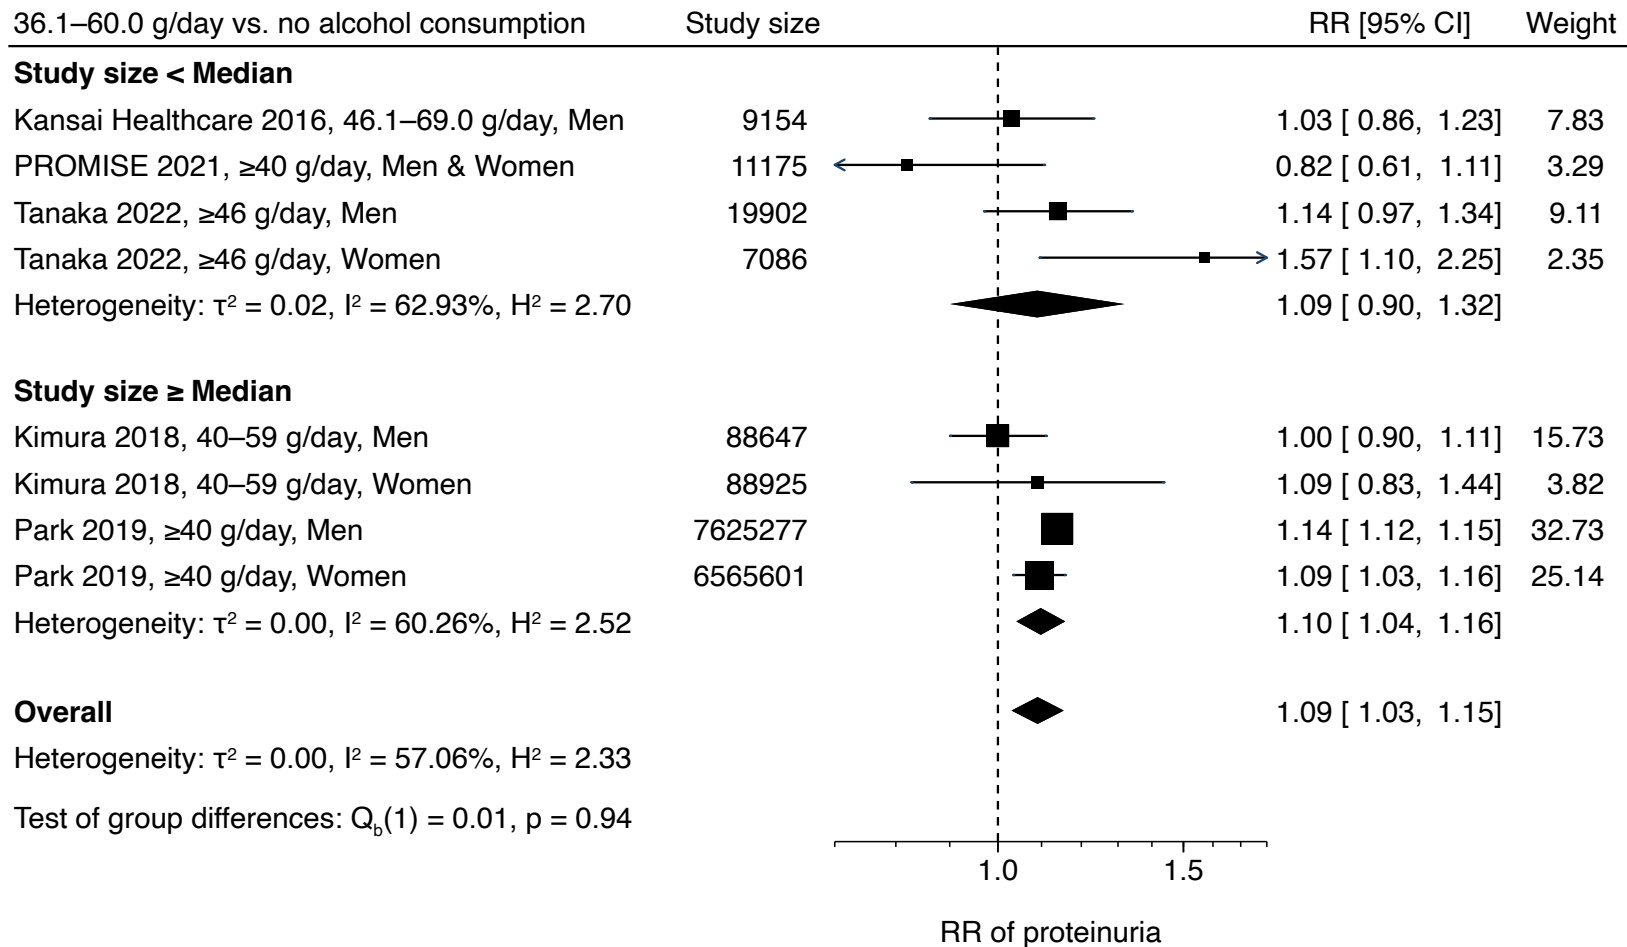

Figure S5c

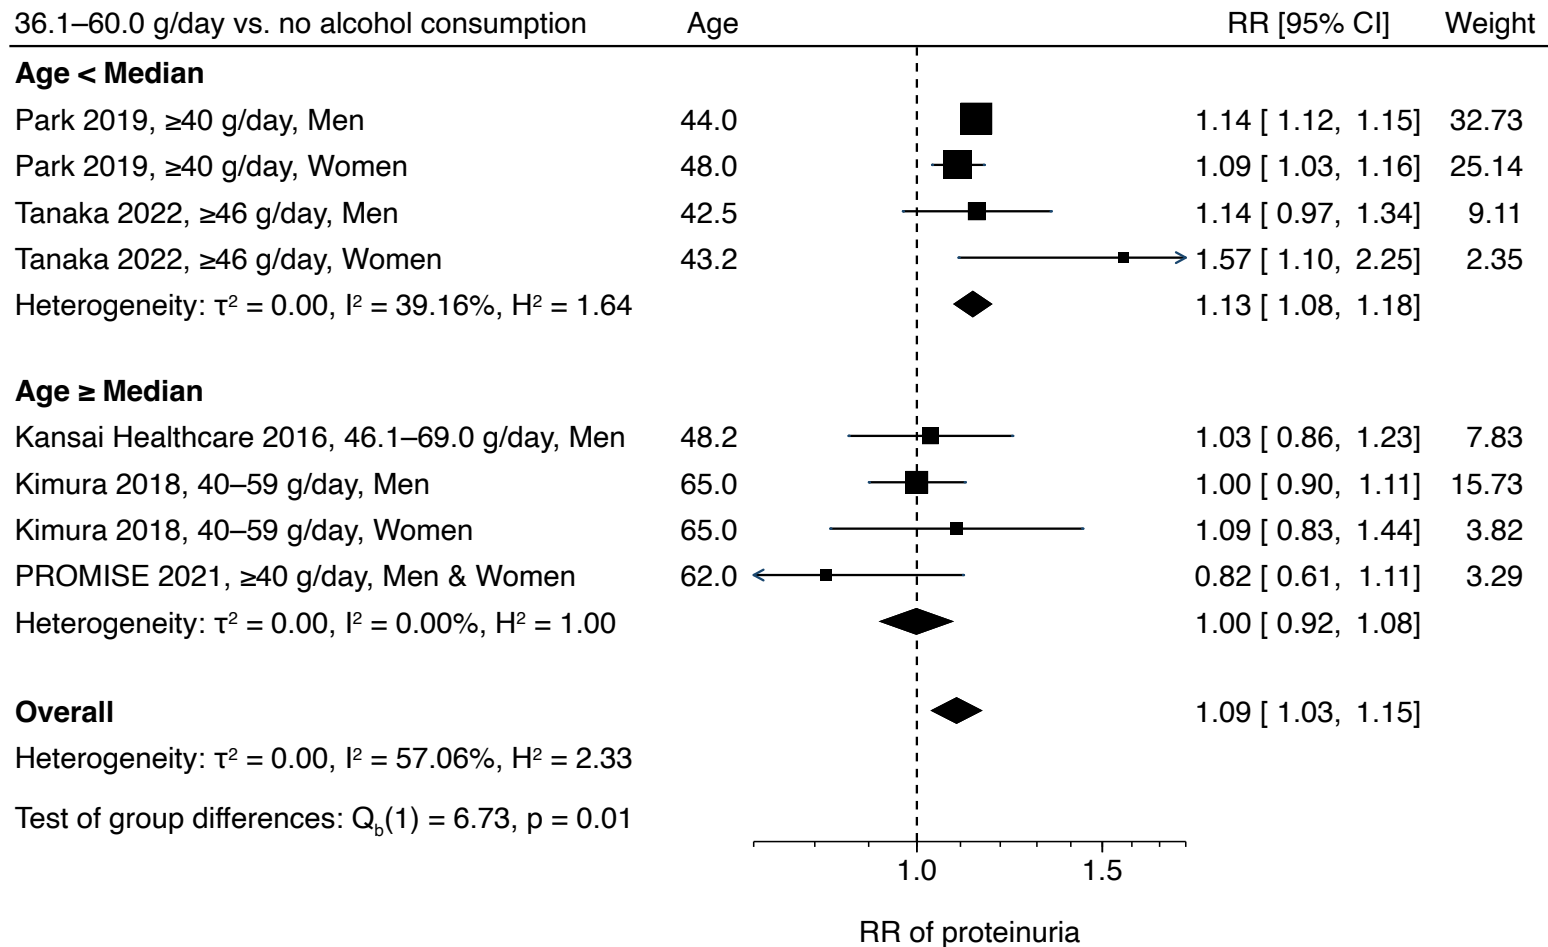

Figure S5d

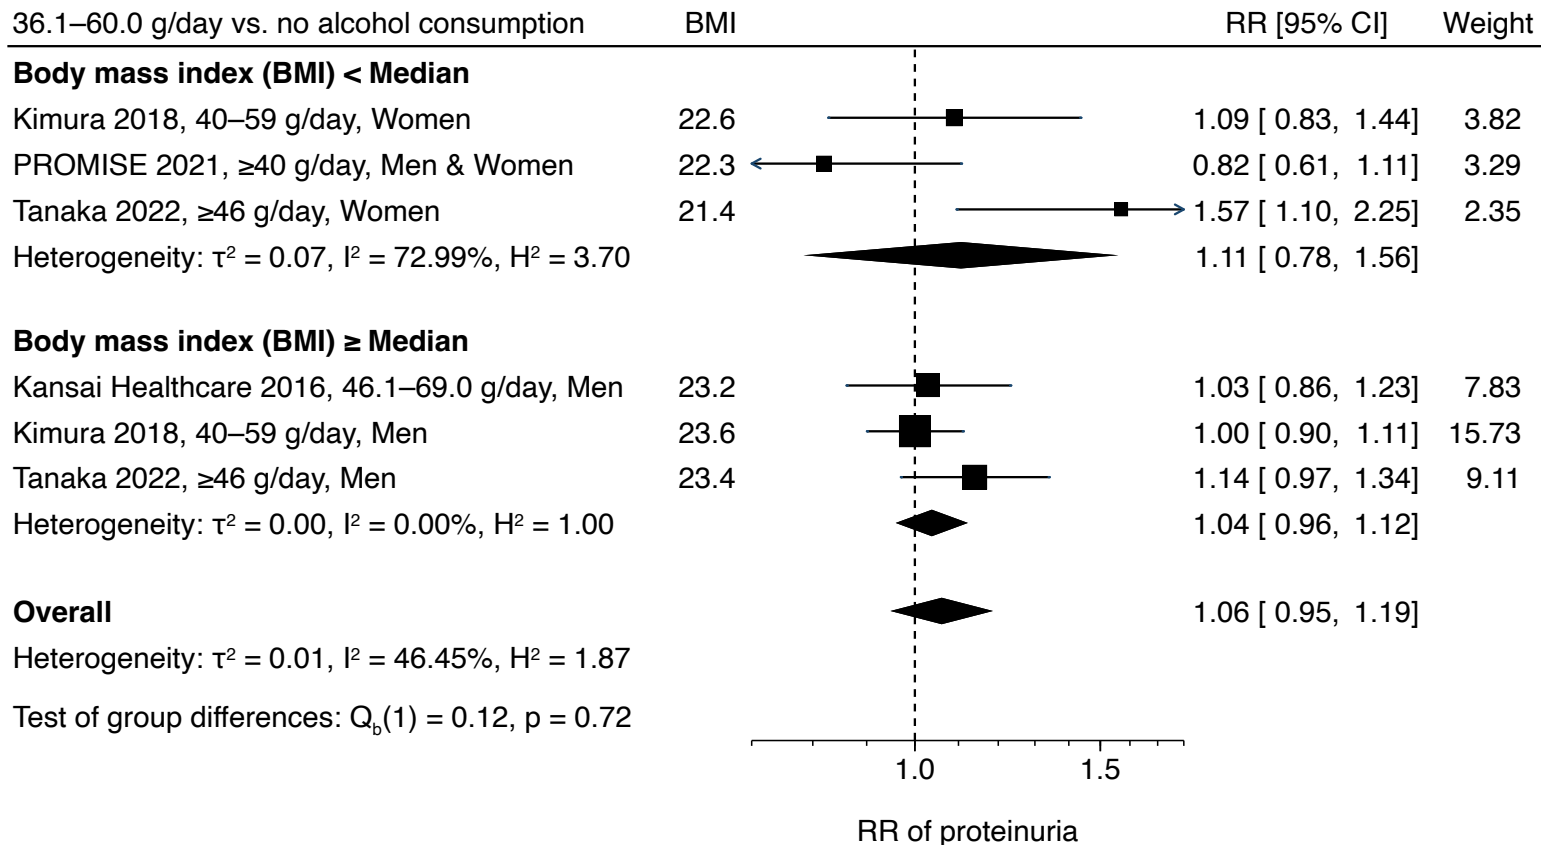



Figure S5e

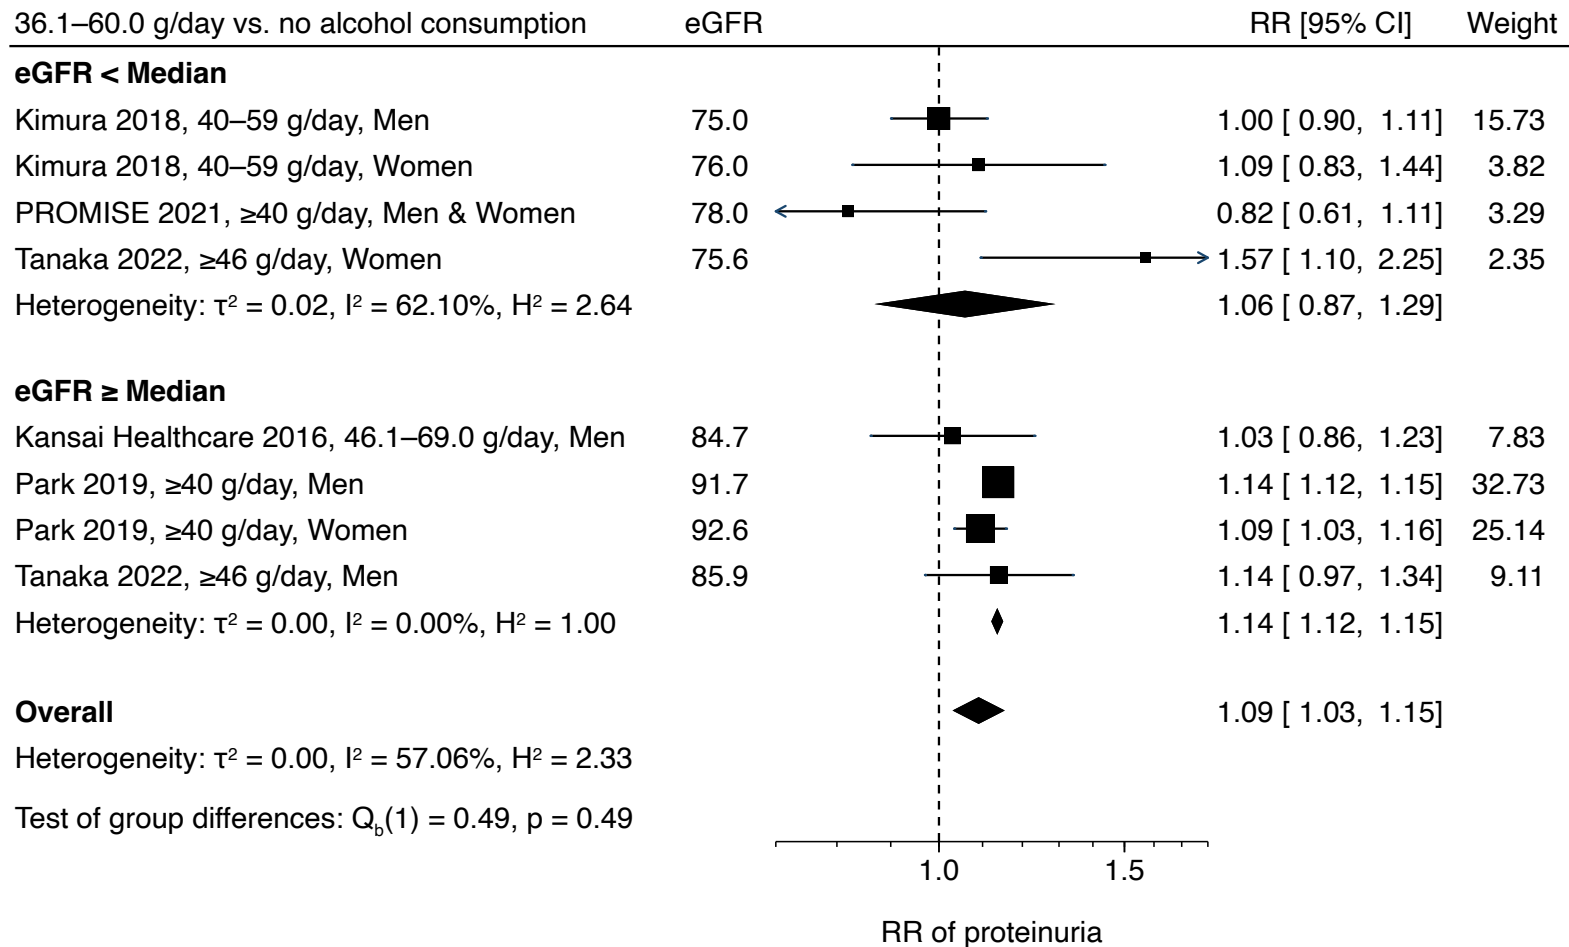

Figure S5f

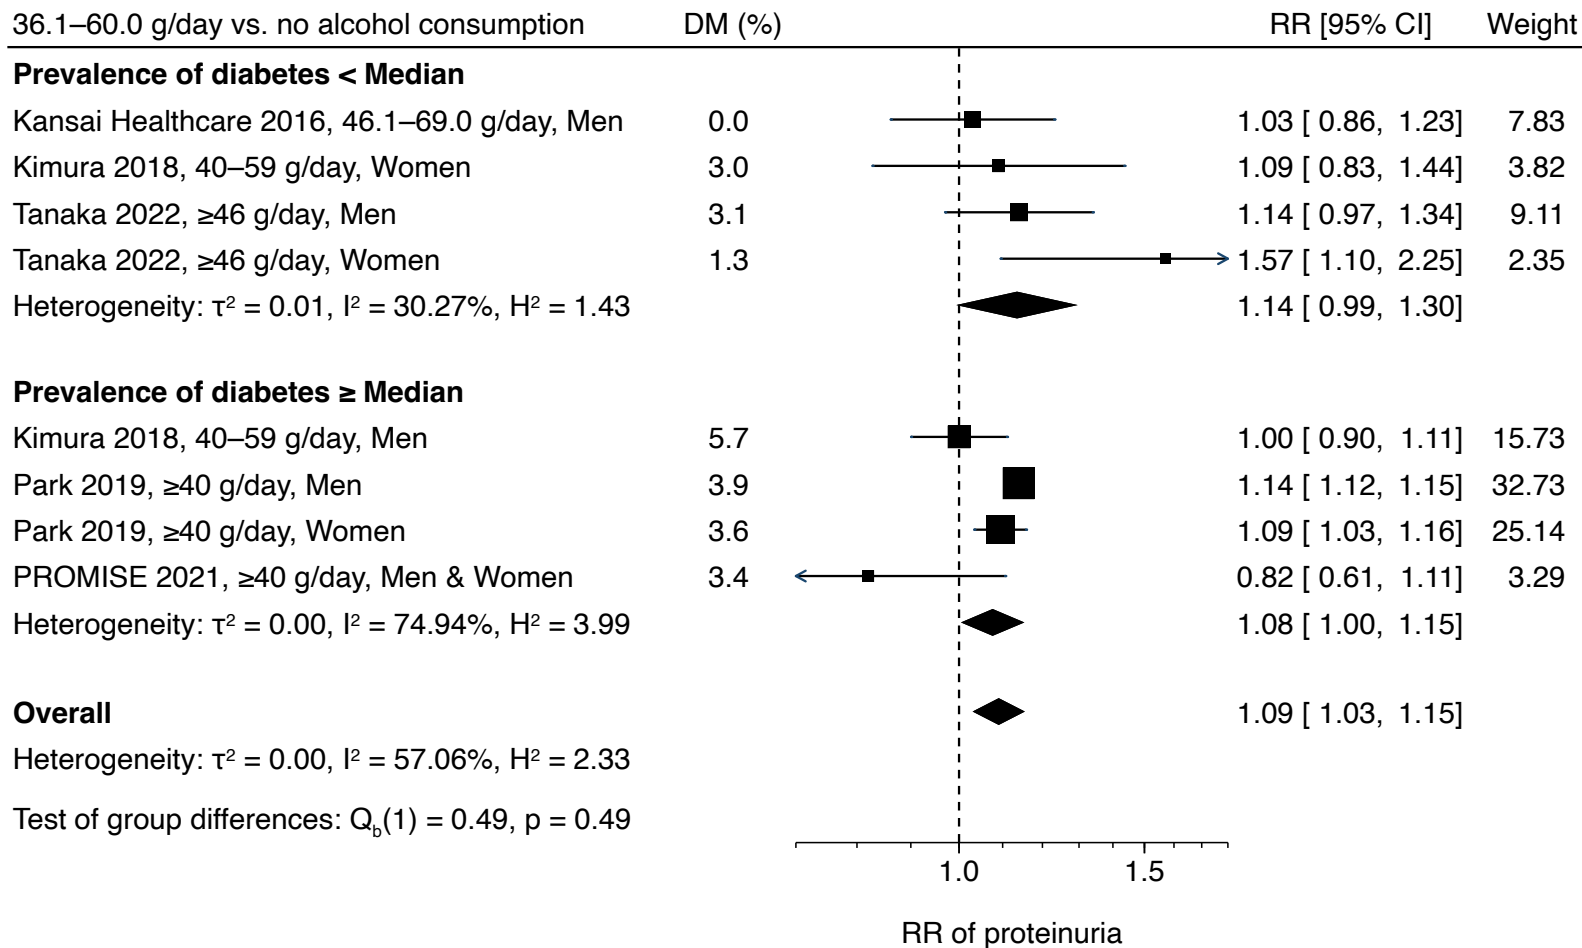

Figure S5g

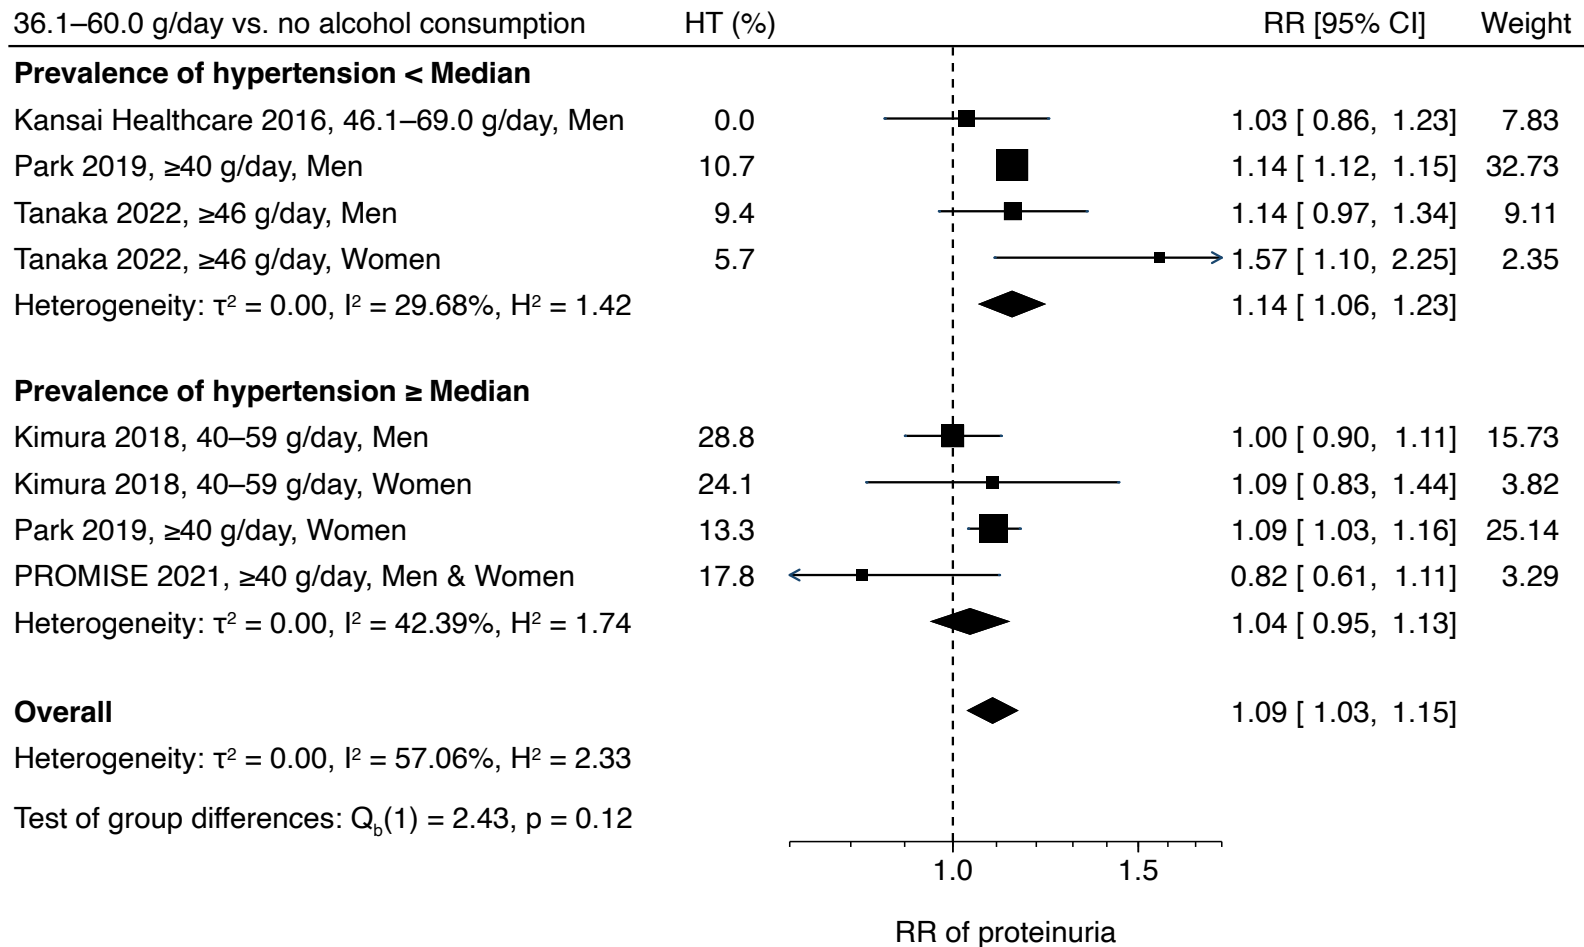

Figure S5h

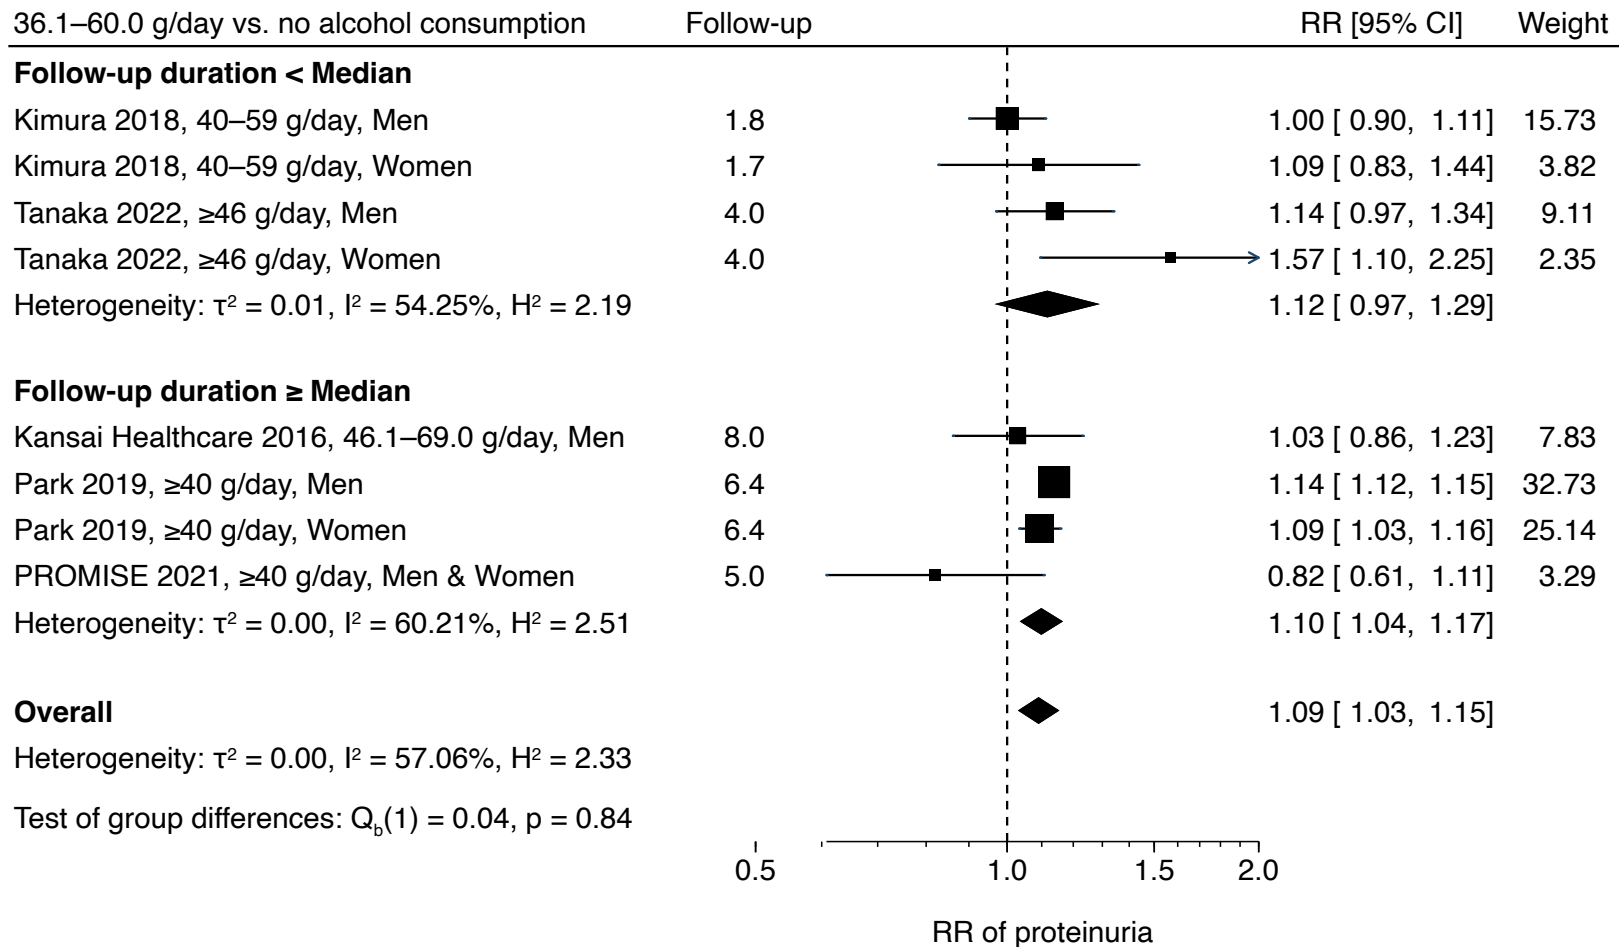

Figure S5i

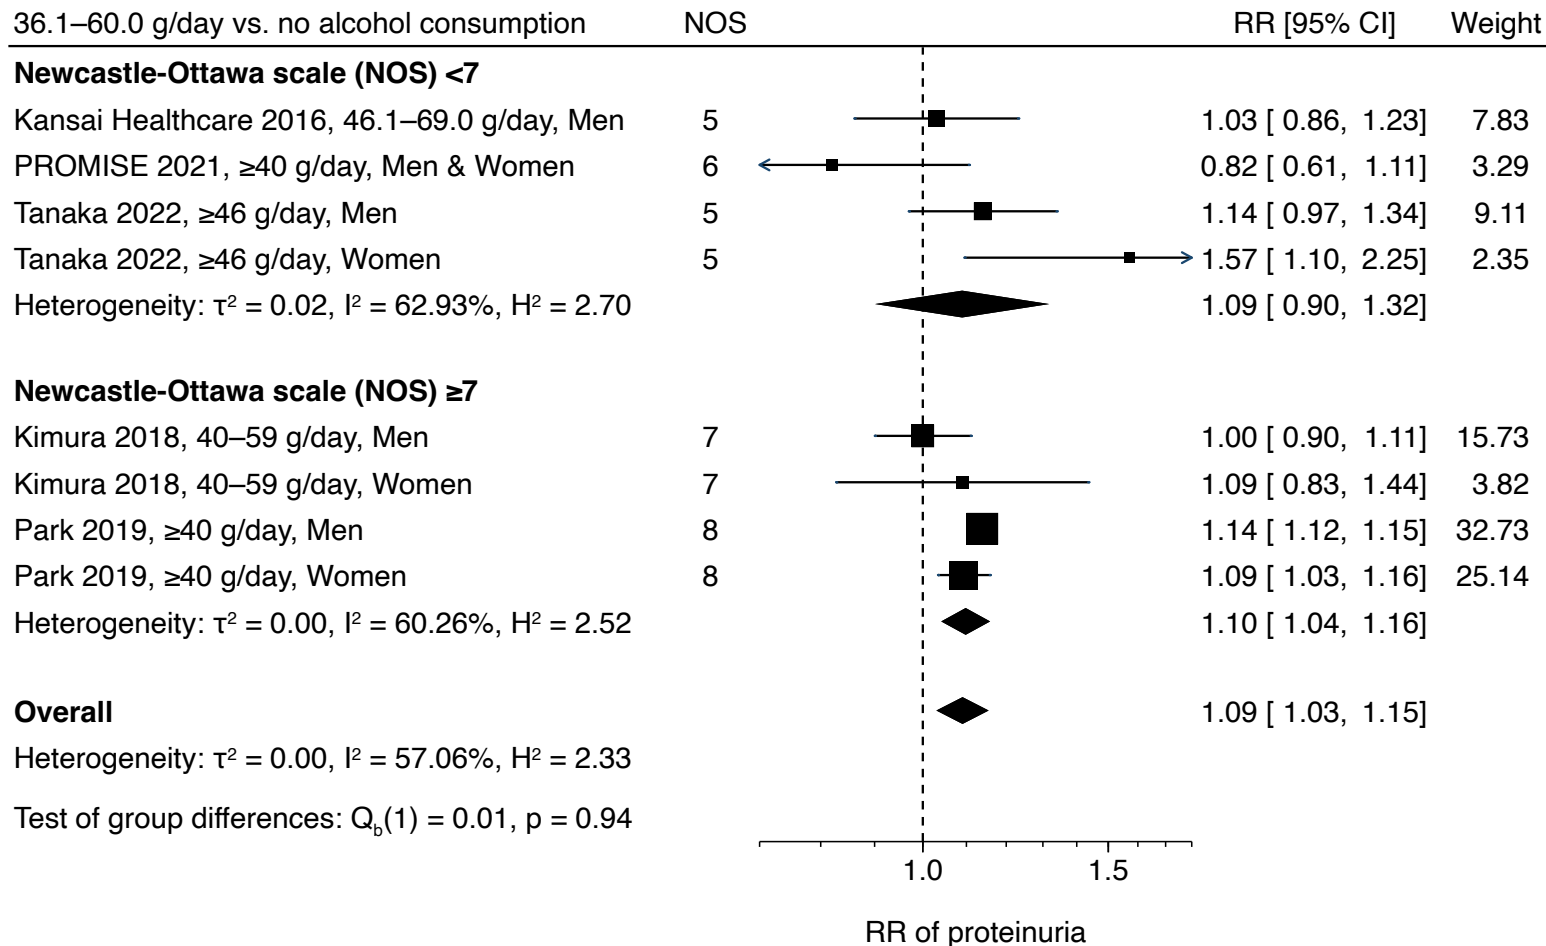

Figure S5j

36.1-60.0 g/day vs. no alcohol consumption

RR [95% CI]

Weight

**Asian countries**

Kansai Healthcare 2016, 46.1–69.0 g/day, Men

1.03 [ 0.86, 1.23] 7.83

Kimura 2018, 40–59 g/day, Men

1.00 [ 0.90, 1.11] 15.73

Kimura 2018, 40–59 g/day, Women

1.09 [ 0.83, 1.44] 3.82

Park 2019,  $\geq 40$  g/day, Men

1.14 [ 1.12, 1.15] 32.73

Park 2019,  $\geq 40$  g/day, Women

1.09 [ 1.03, 1.16] 25.14

PROMISE 2021,  $\geq 40$  g/day, Men & Women

0.82 [ 0.61, 1.11] 3.29

Tanaka 2022,  $\geq 46$  g/day, Men

1.14 [ 0.97, 1.34] 9.11

Tanaka 2022,  $\geq 46$  g/day, Women

1.57 [ 1.10, 2.25] 2.35

Heterogeneity:  $\tau^2 = 0.00$ ,  $I^2 = 57.06\%$ ,  $H^2 = 2.33$ 

1.09 [ 1.03, 1.15]

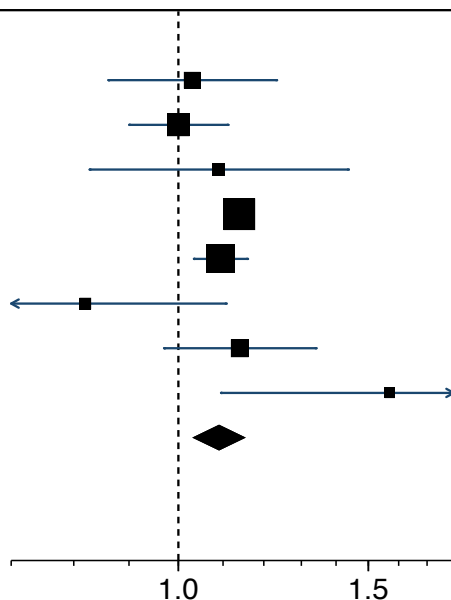

RR of proteinuria

Figure S6a

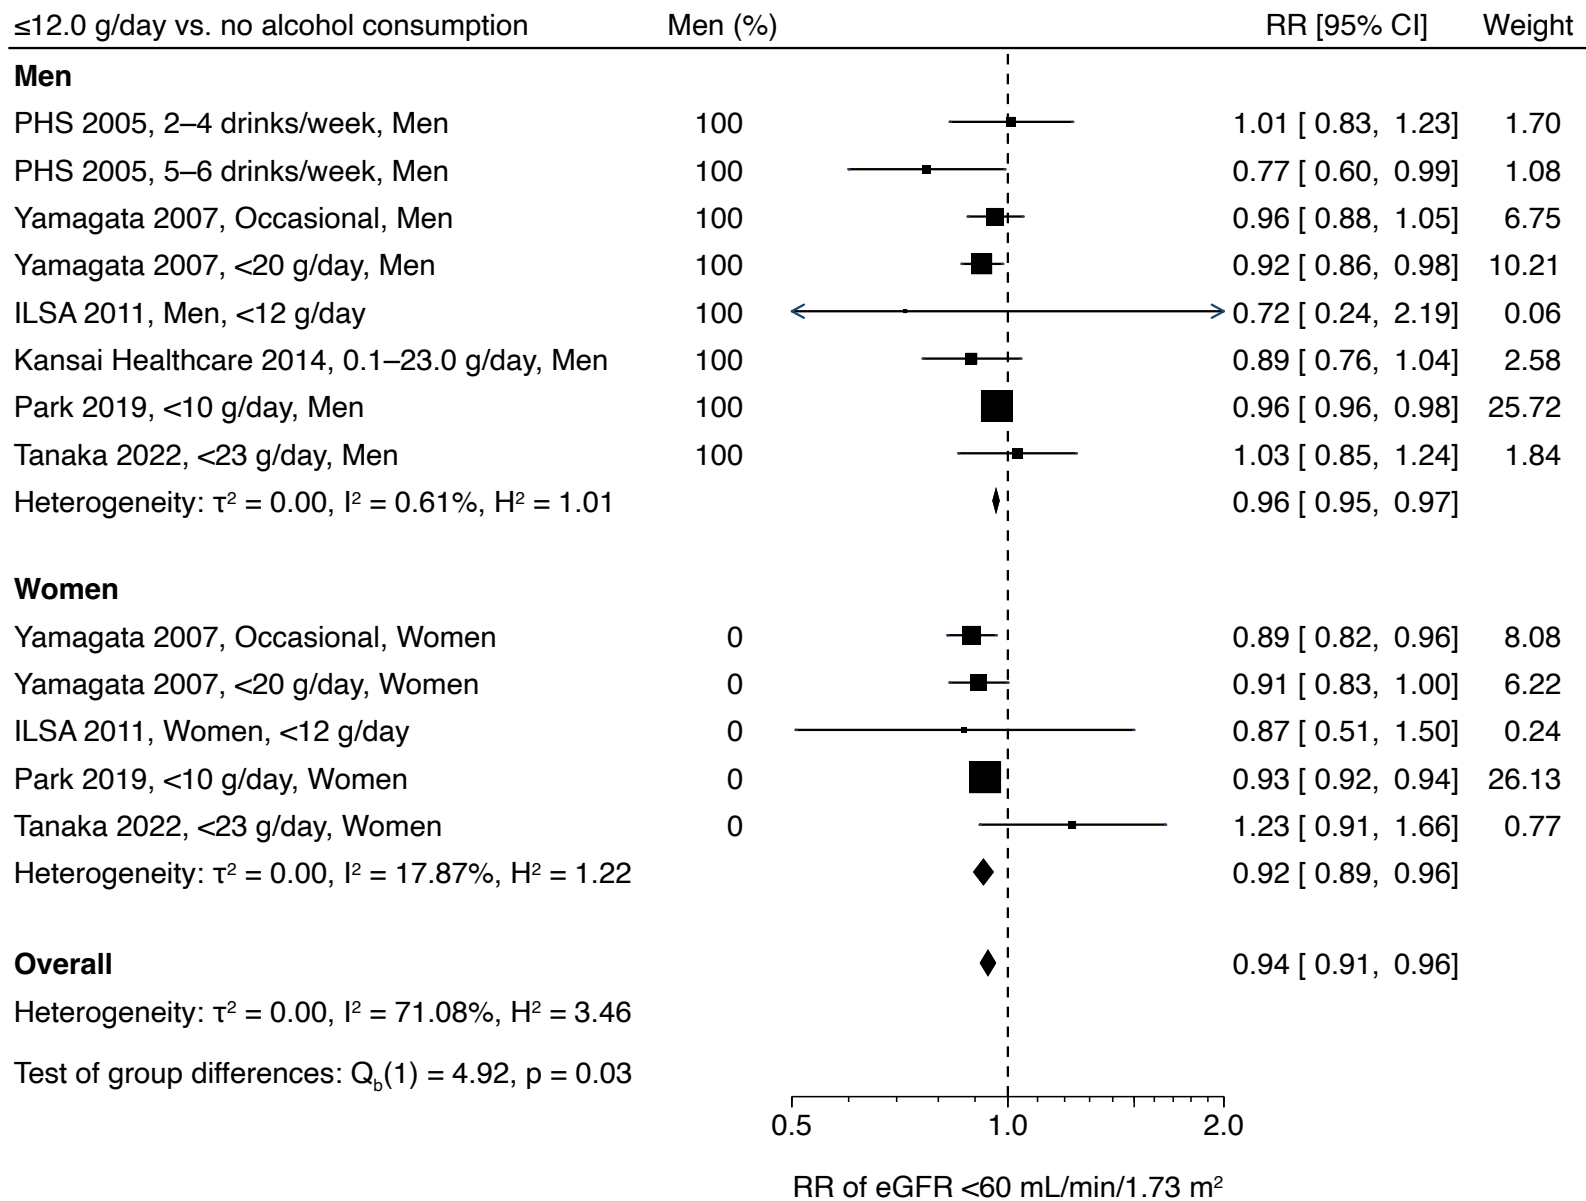

Figure S6b

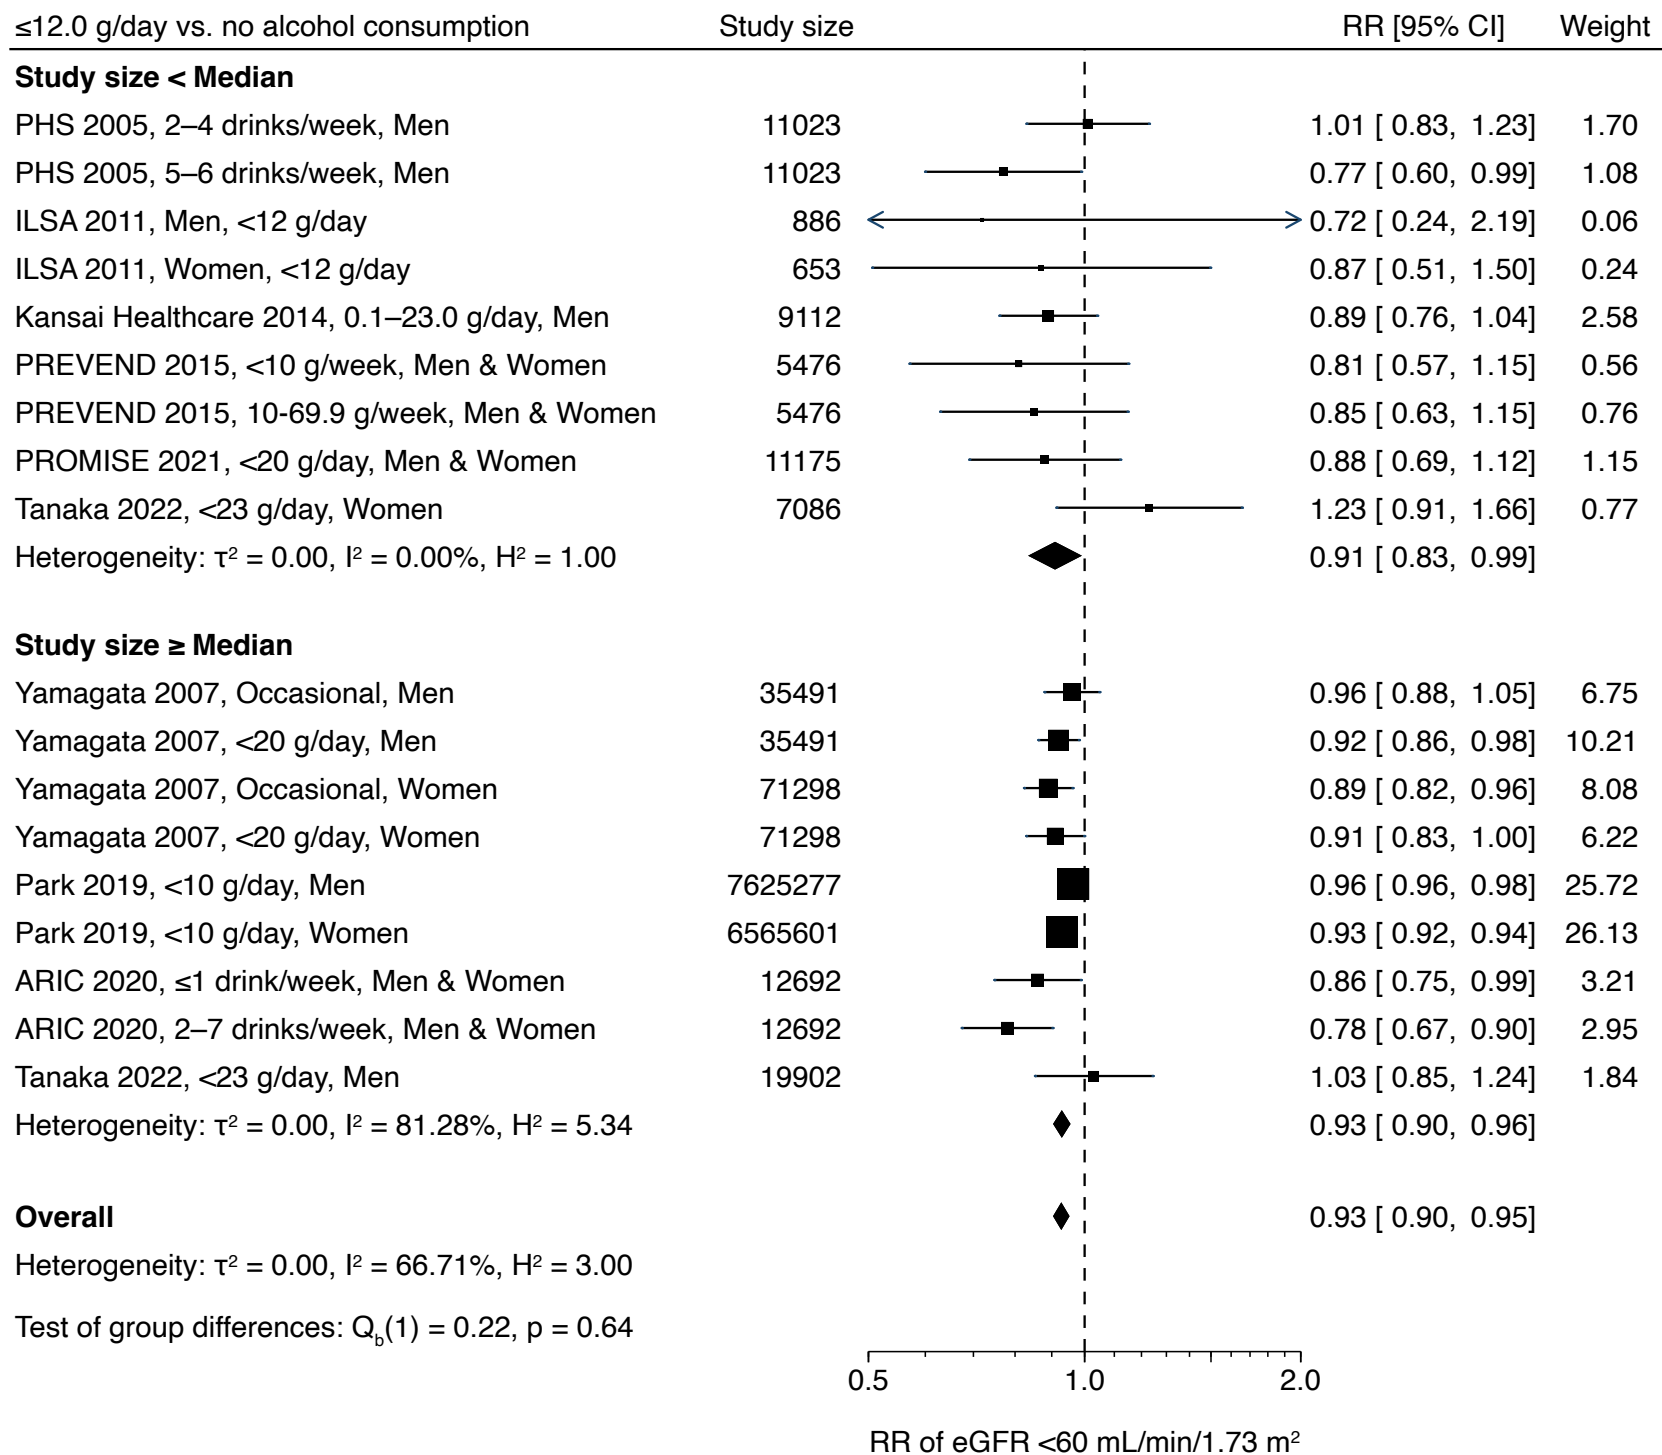



Figure S6c

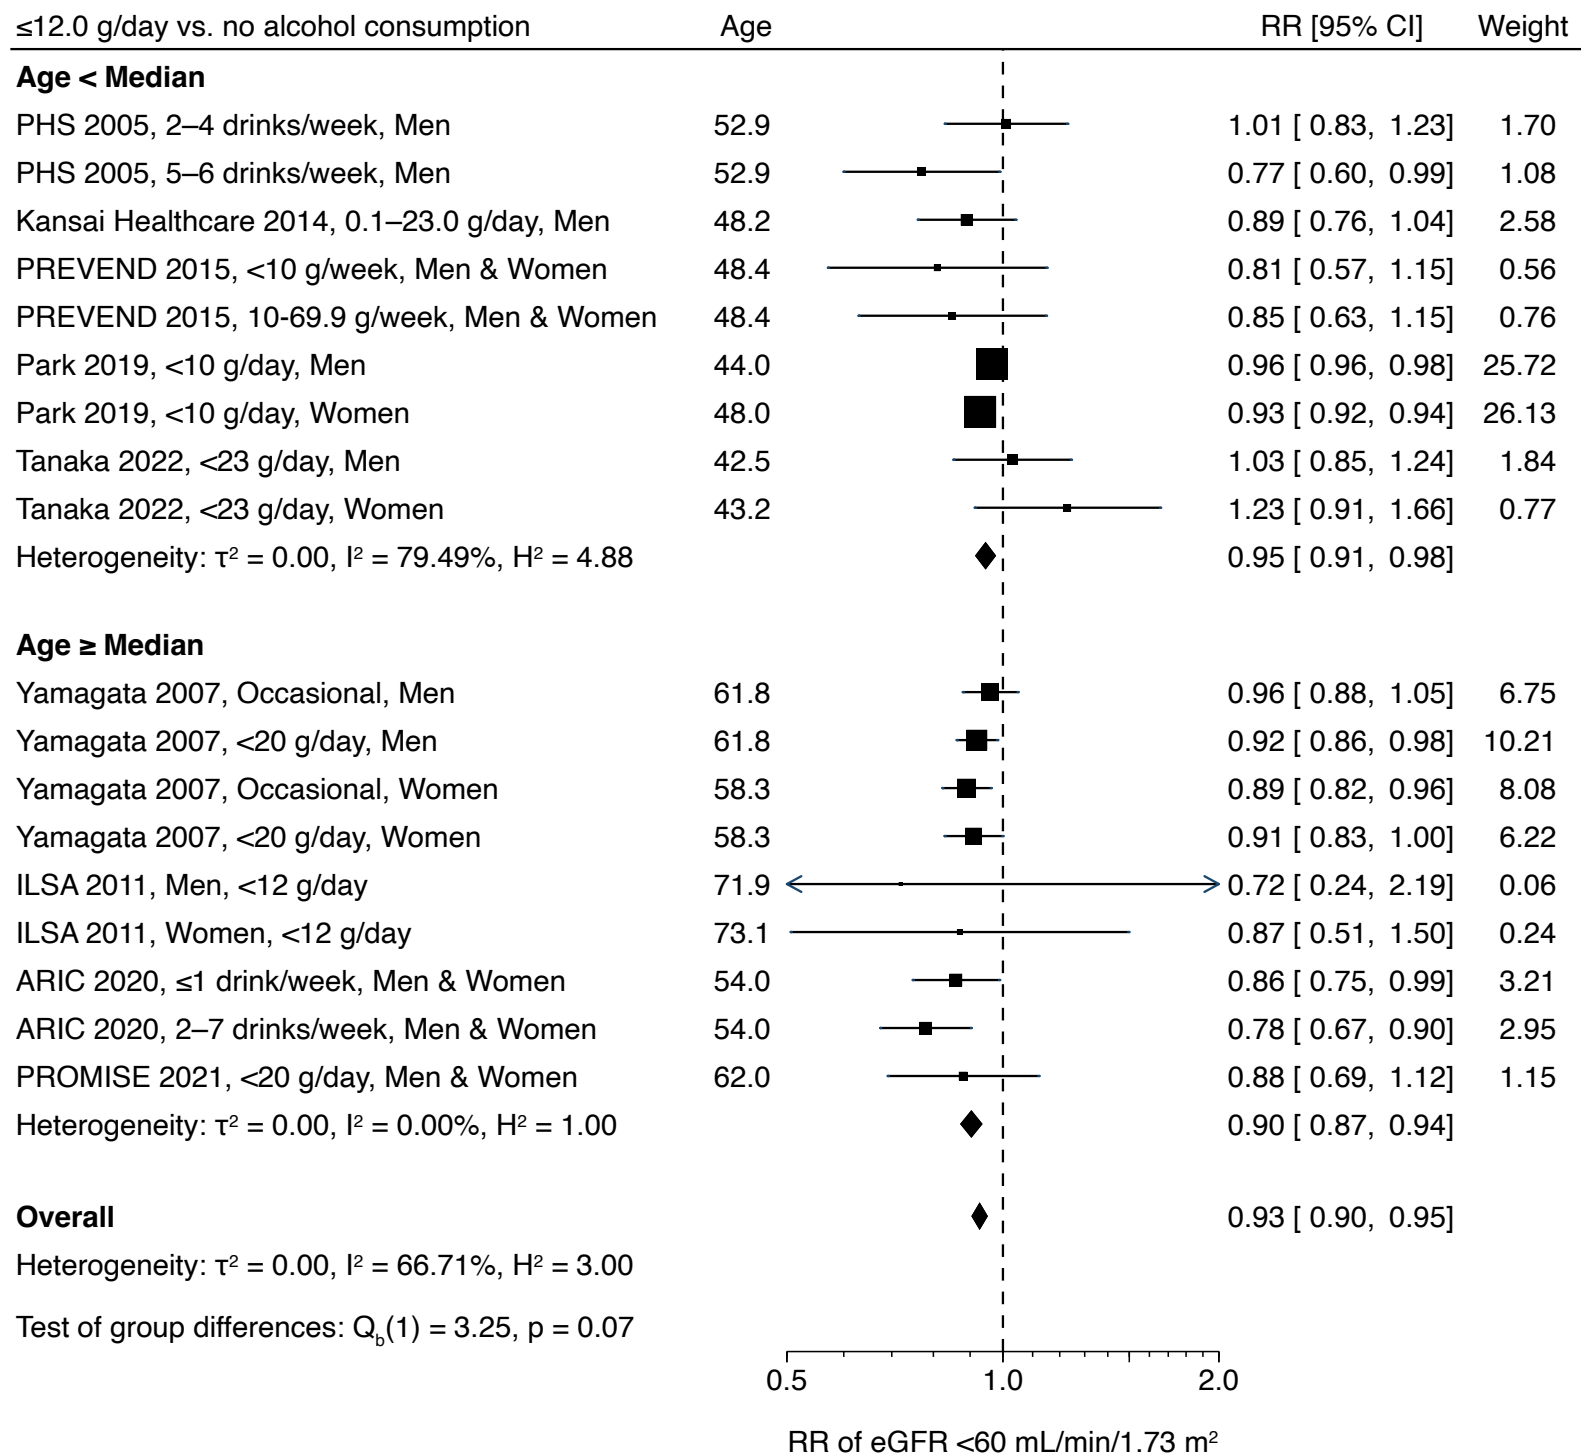

Figure S6d

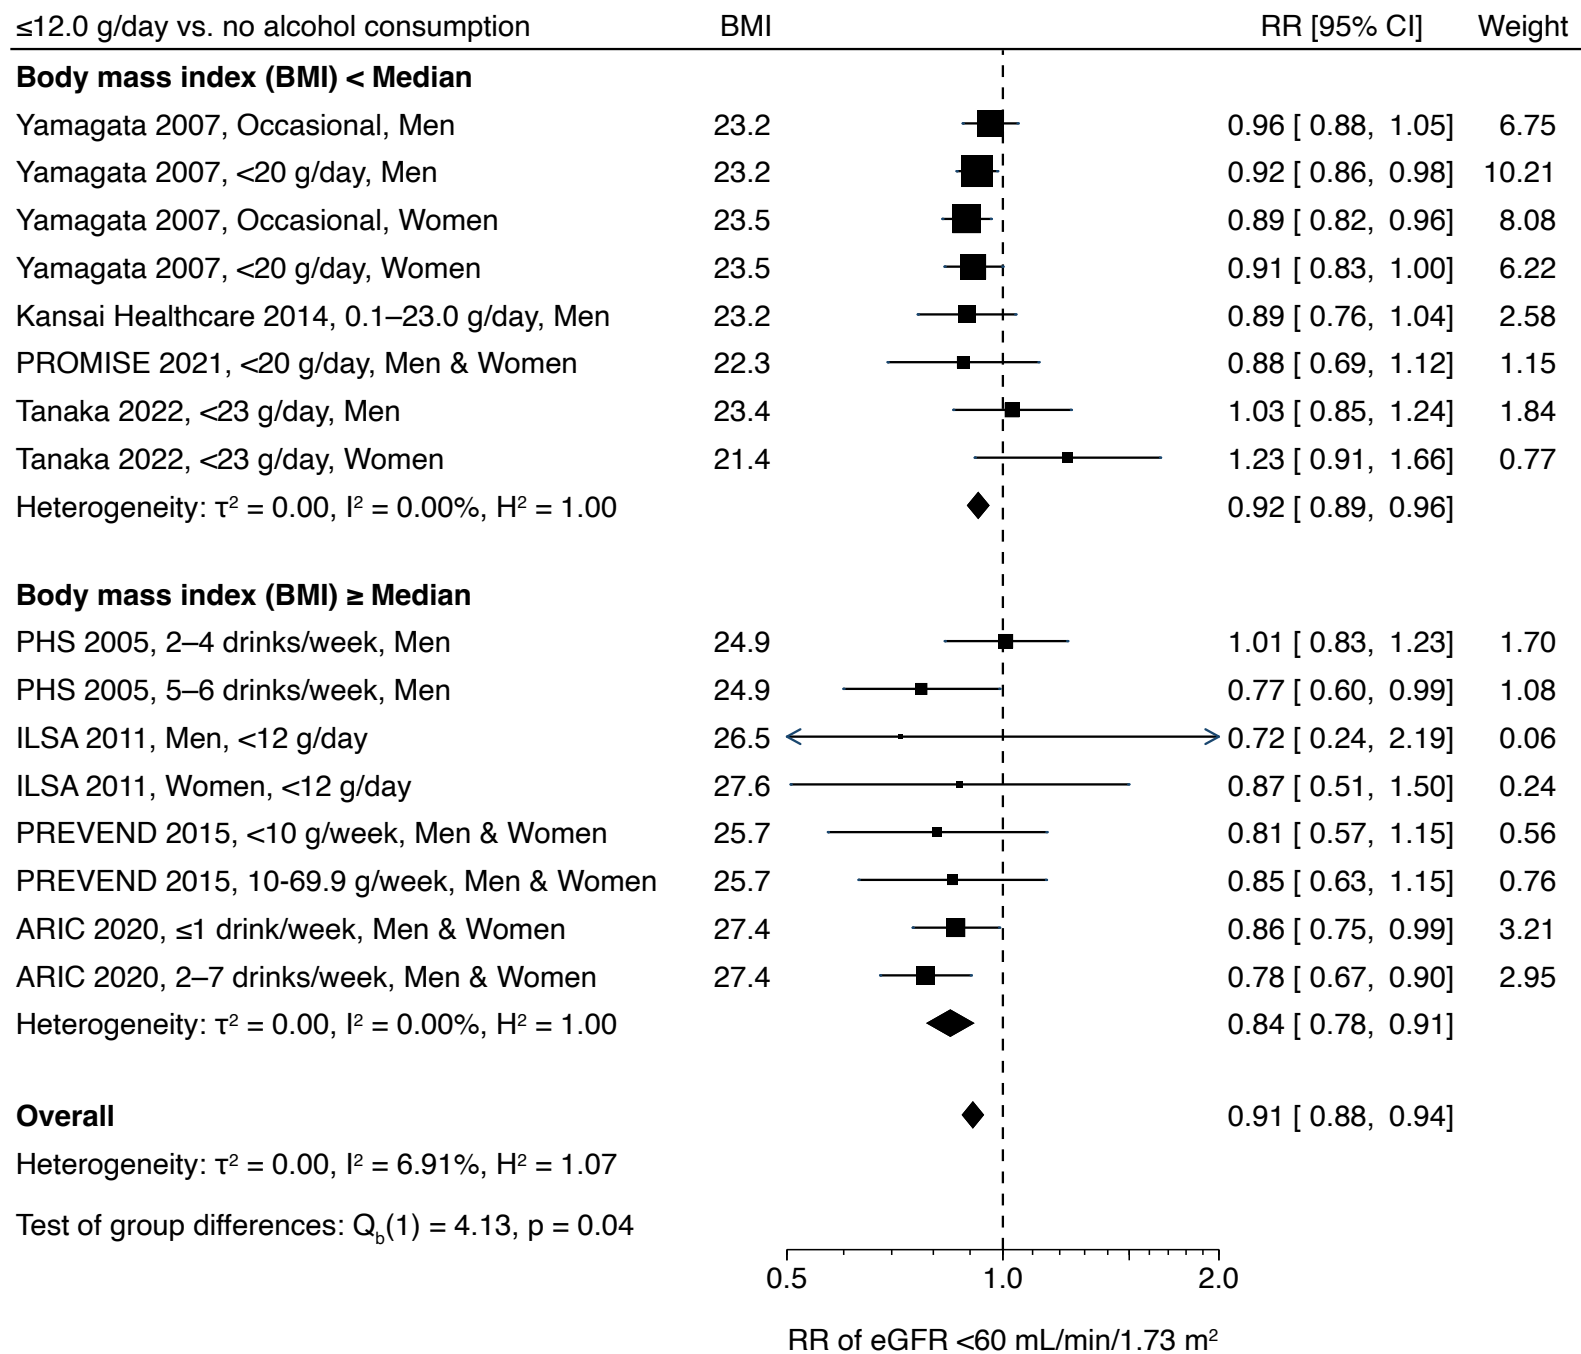

Figure S6e

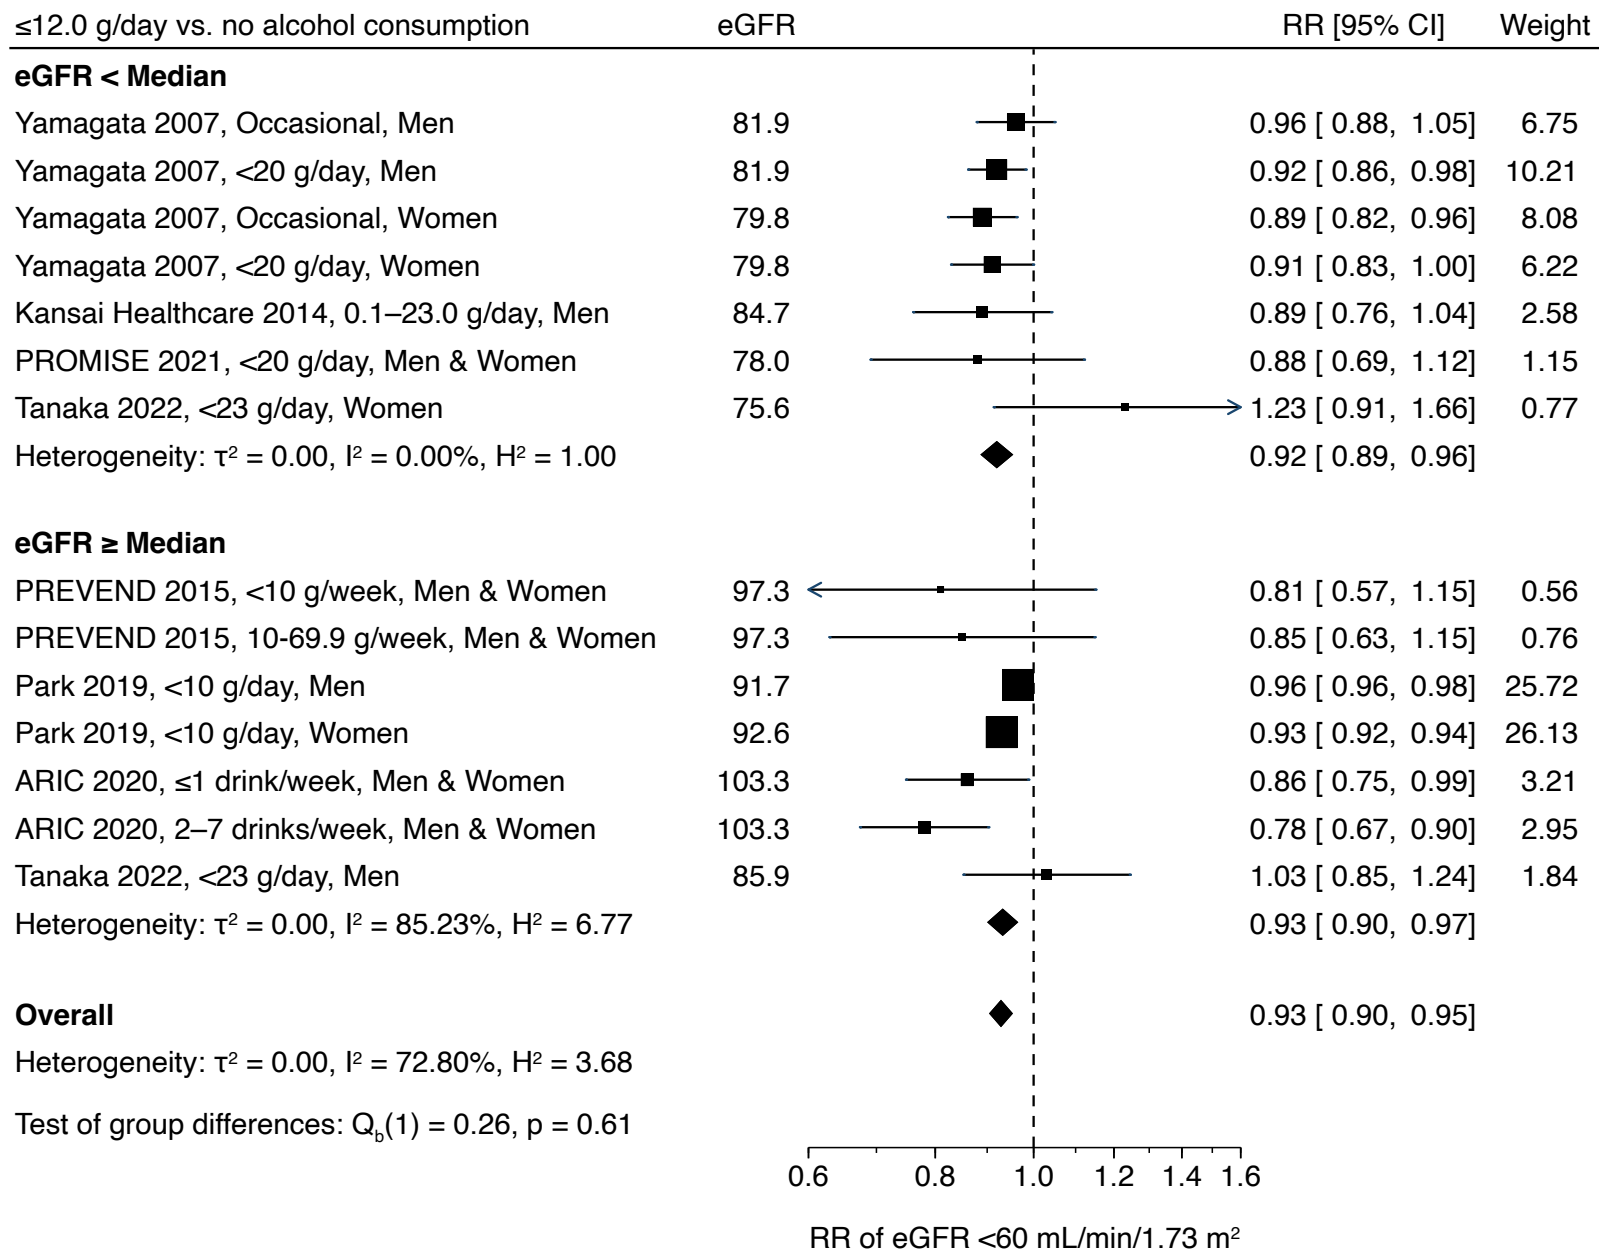

Figure S6f

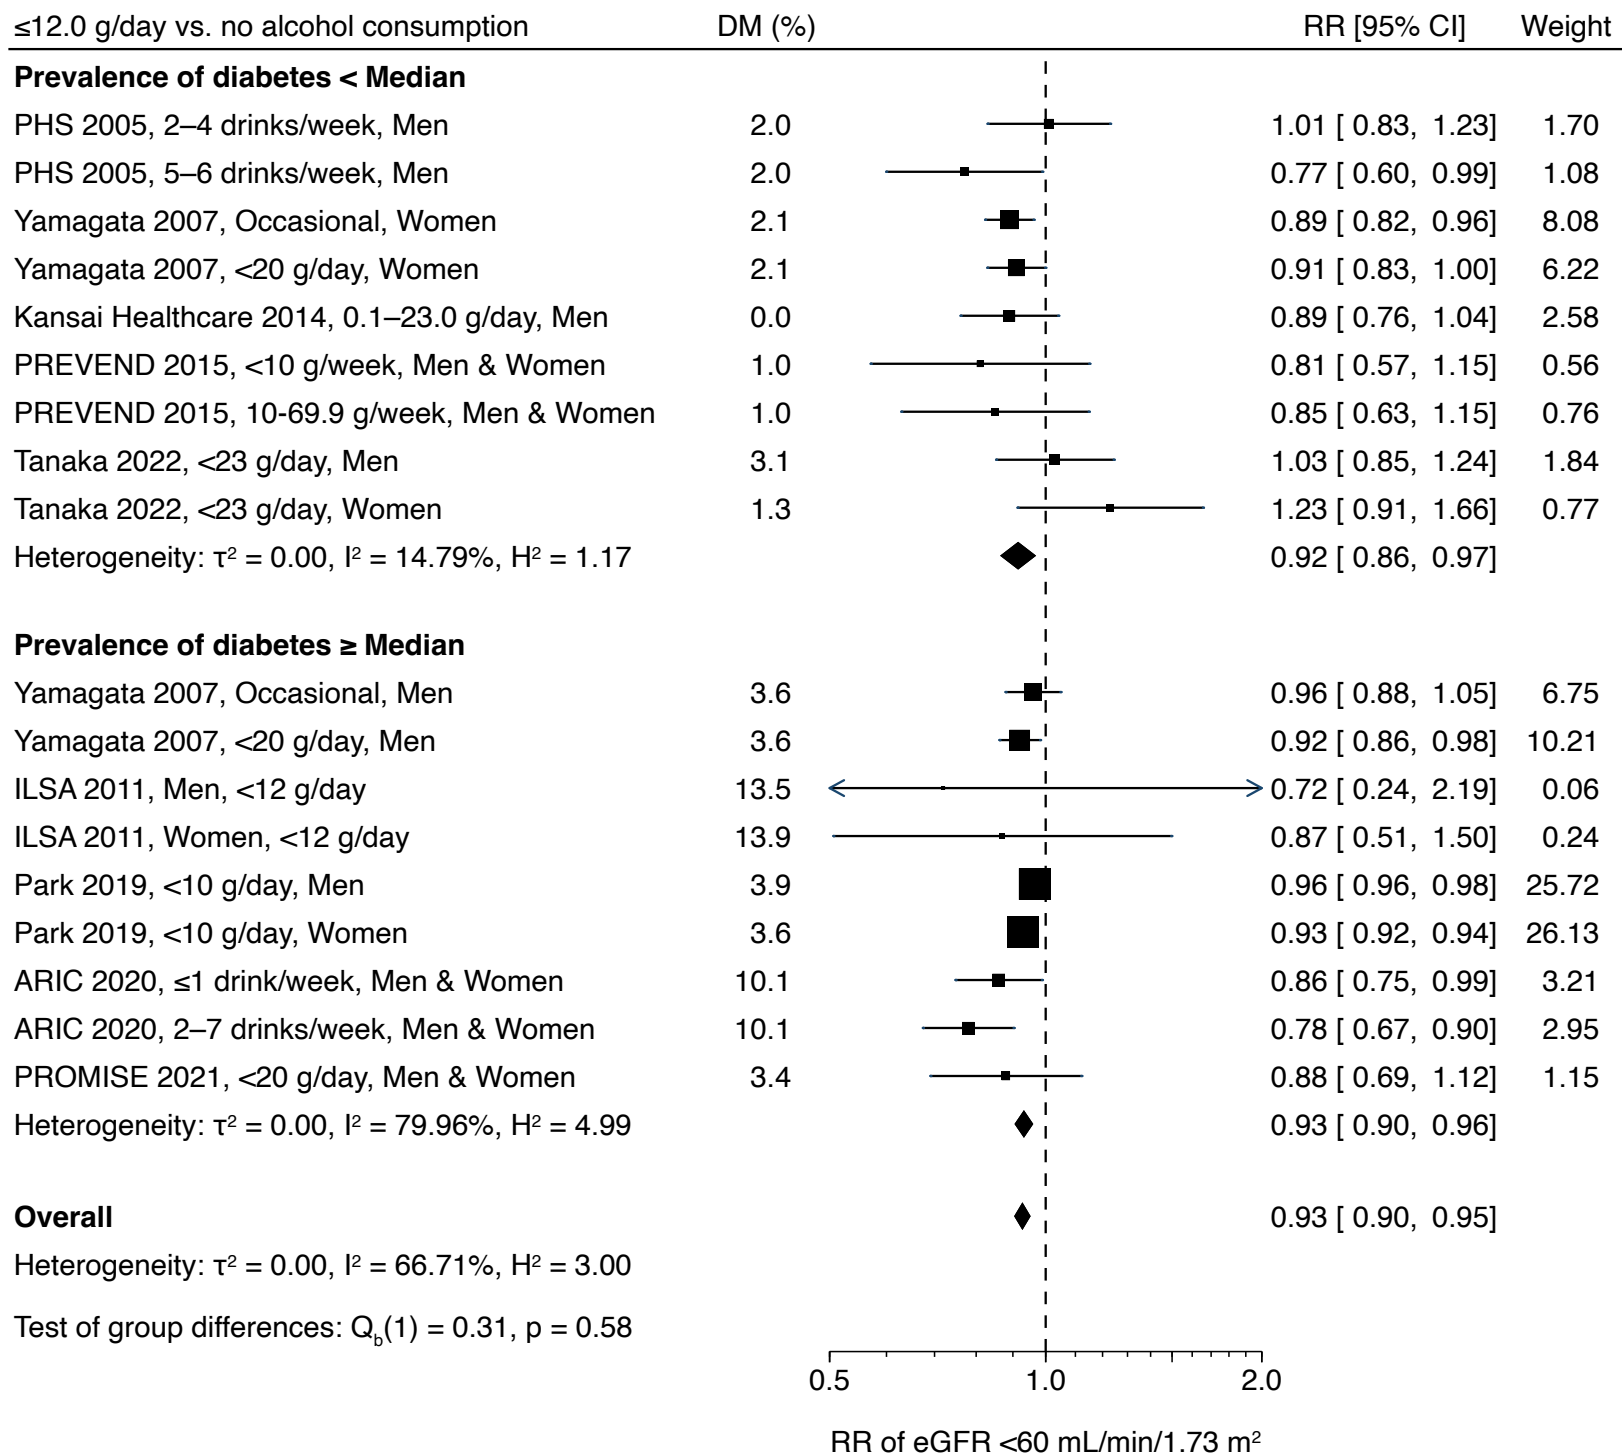

Figure S6g

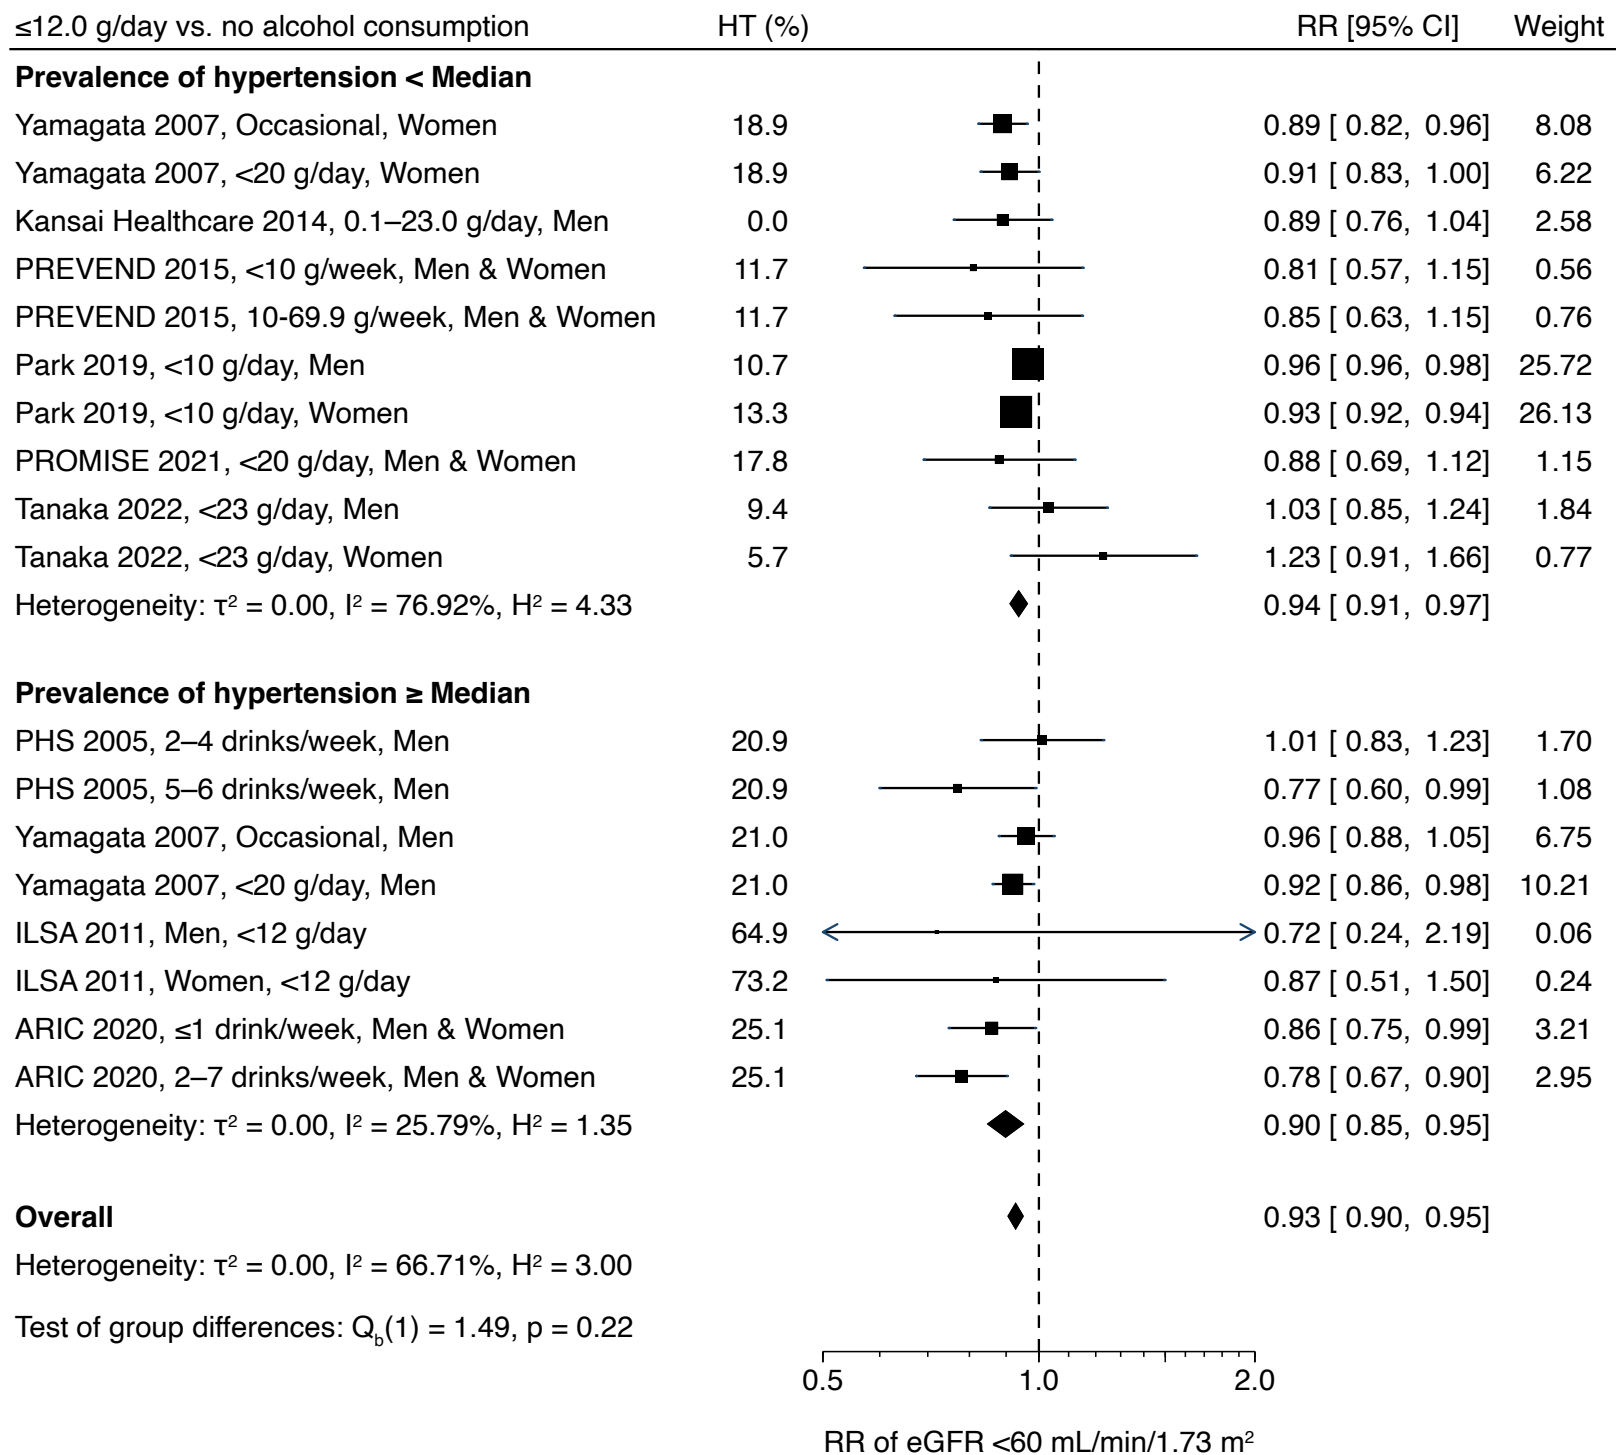

Figure S6h

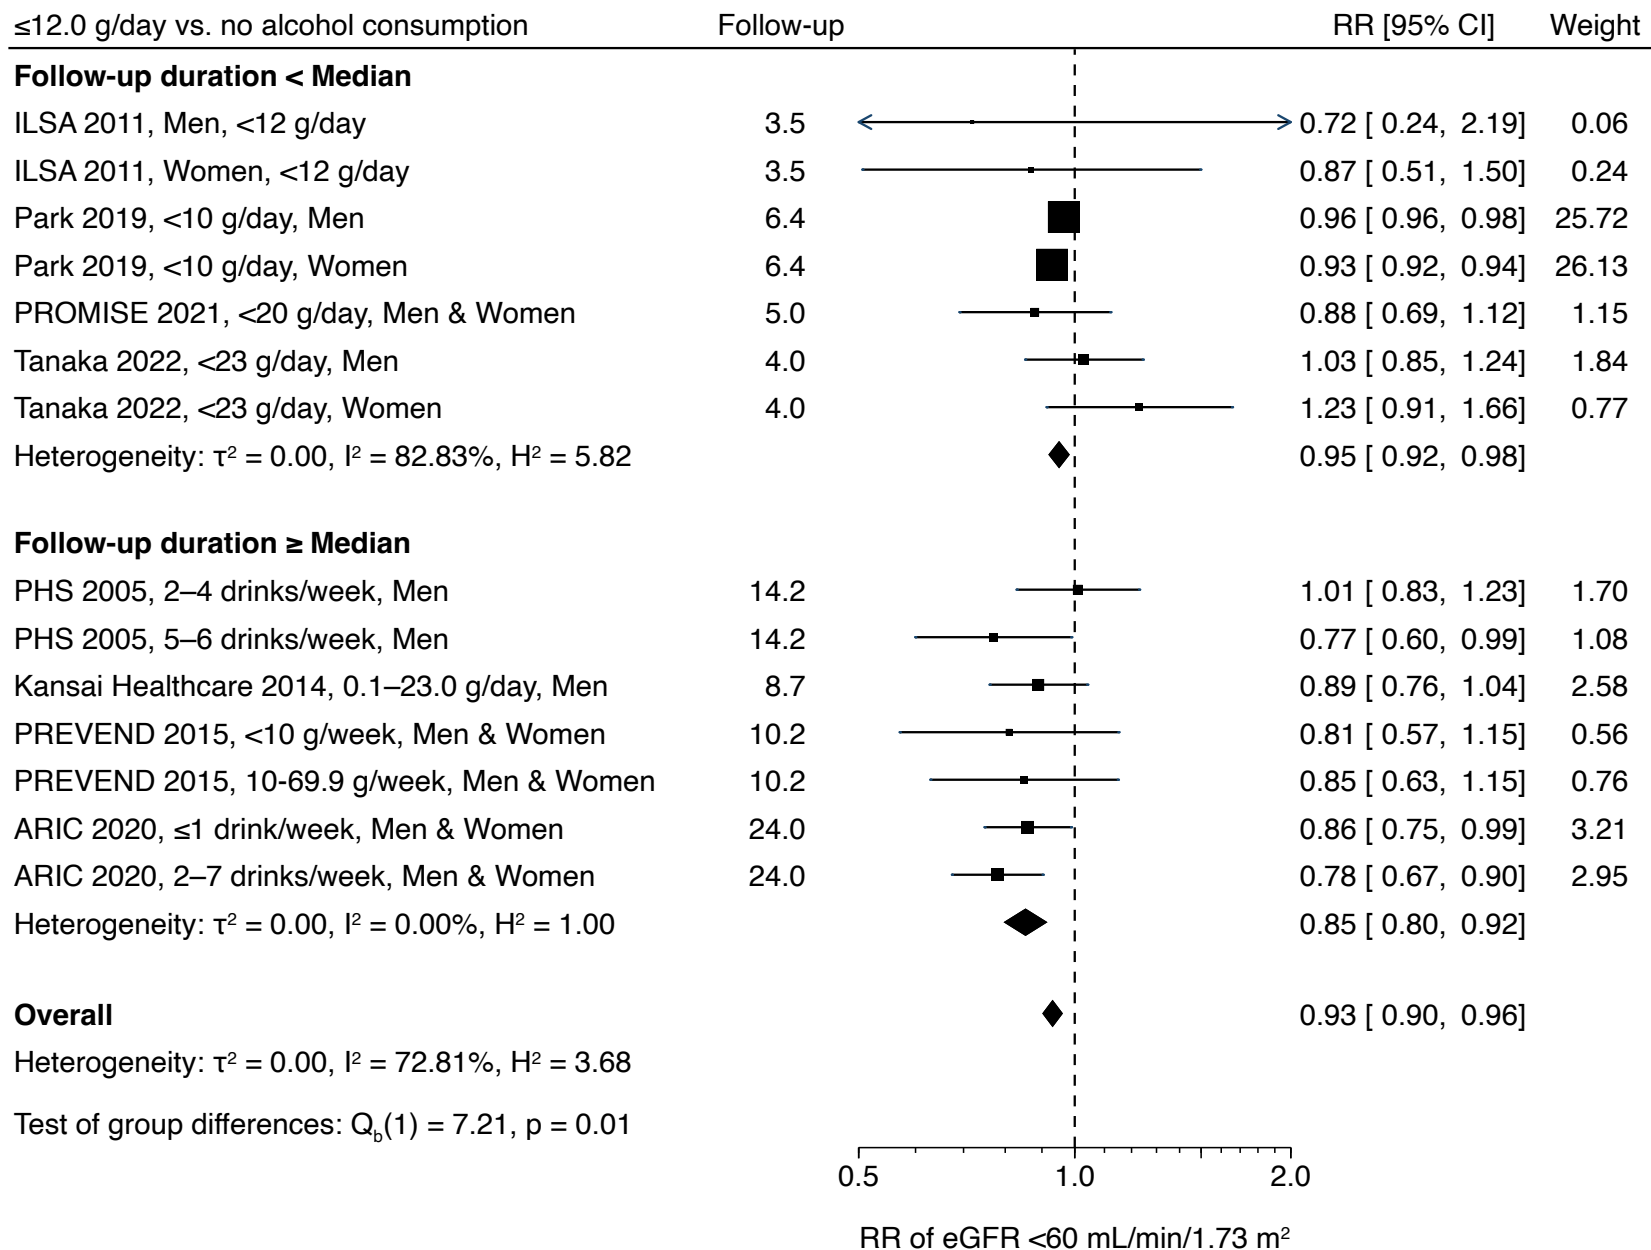

Figure S6i

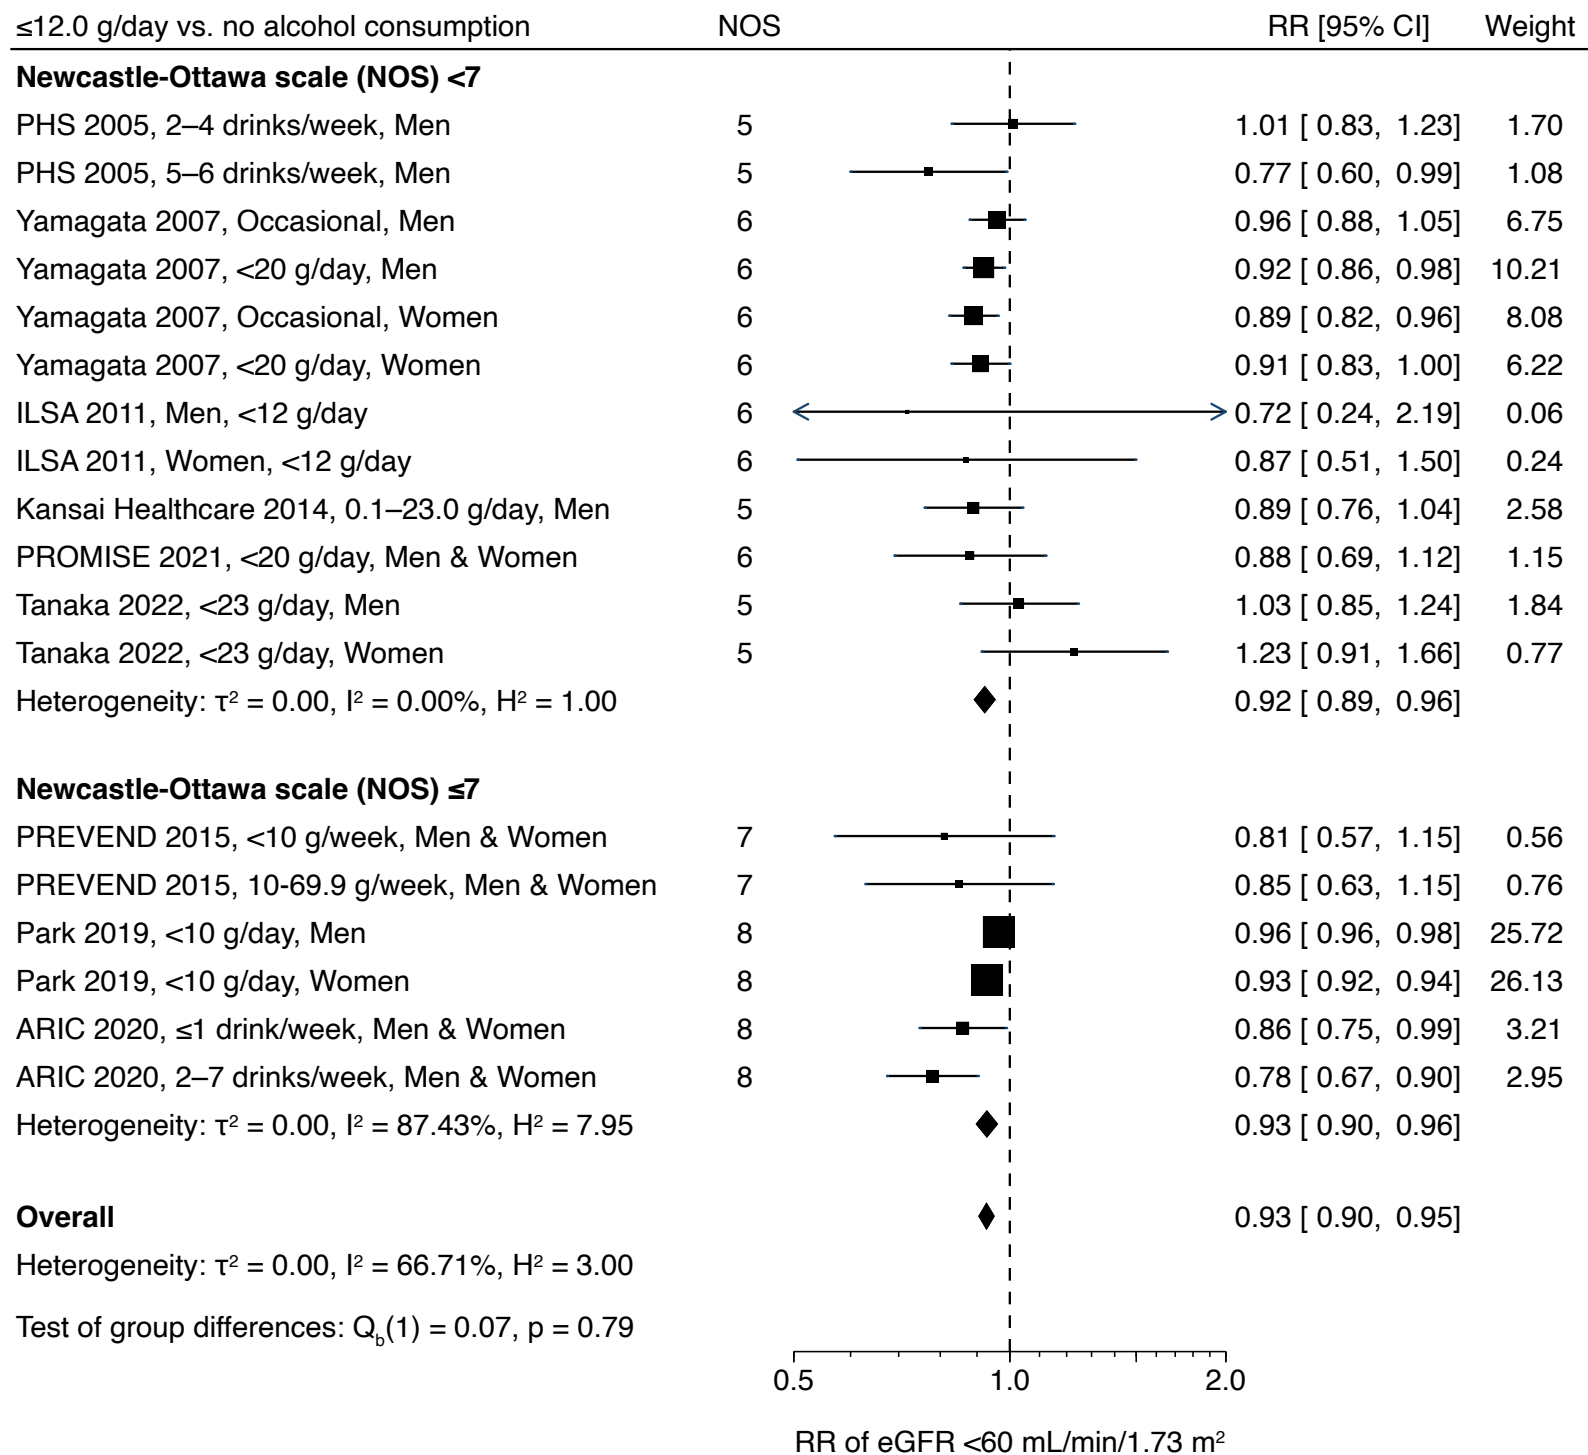

Figure S6j

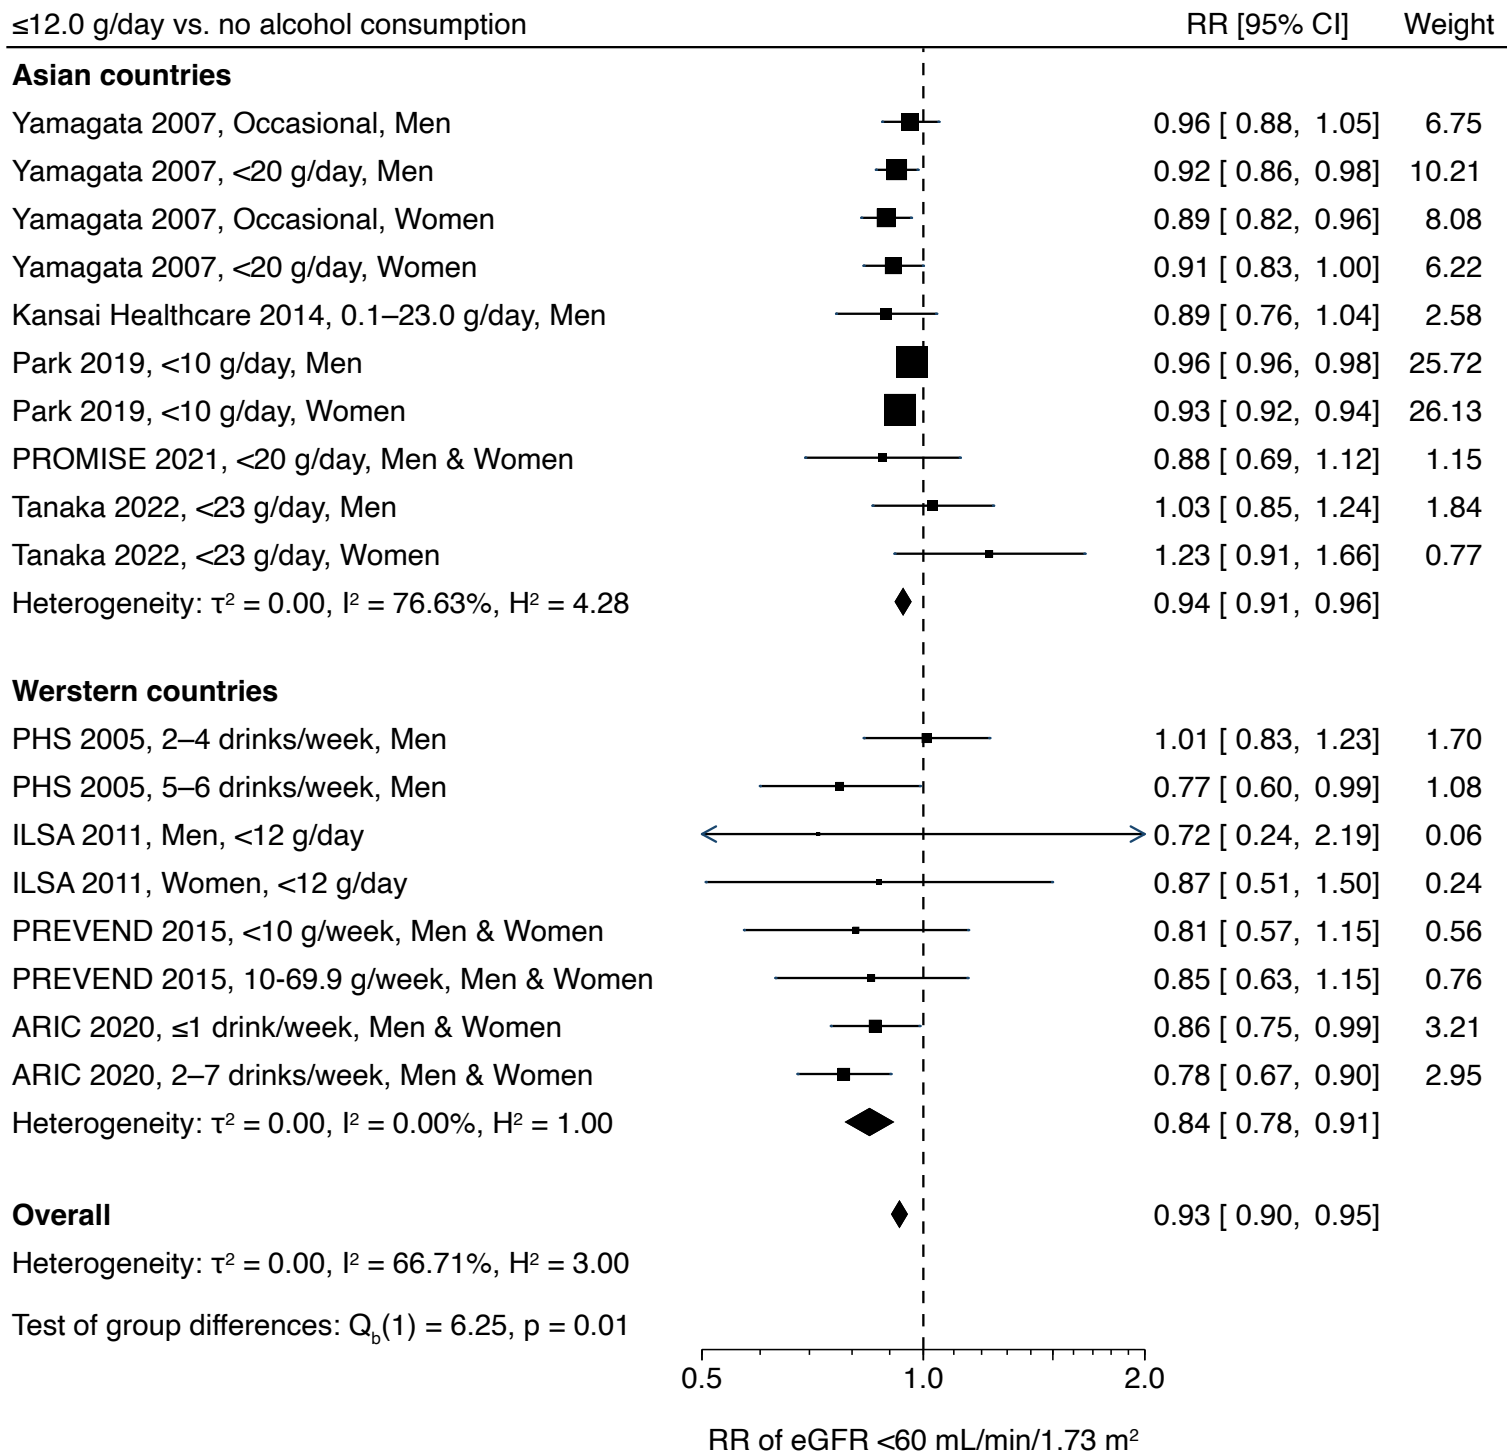



Figure S7a

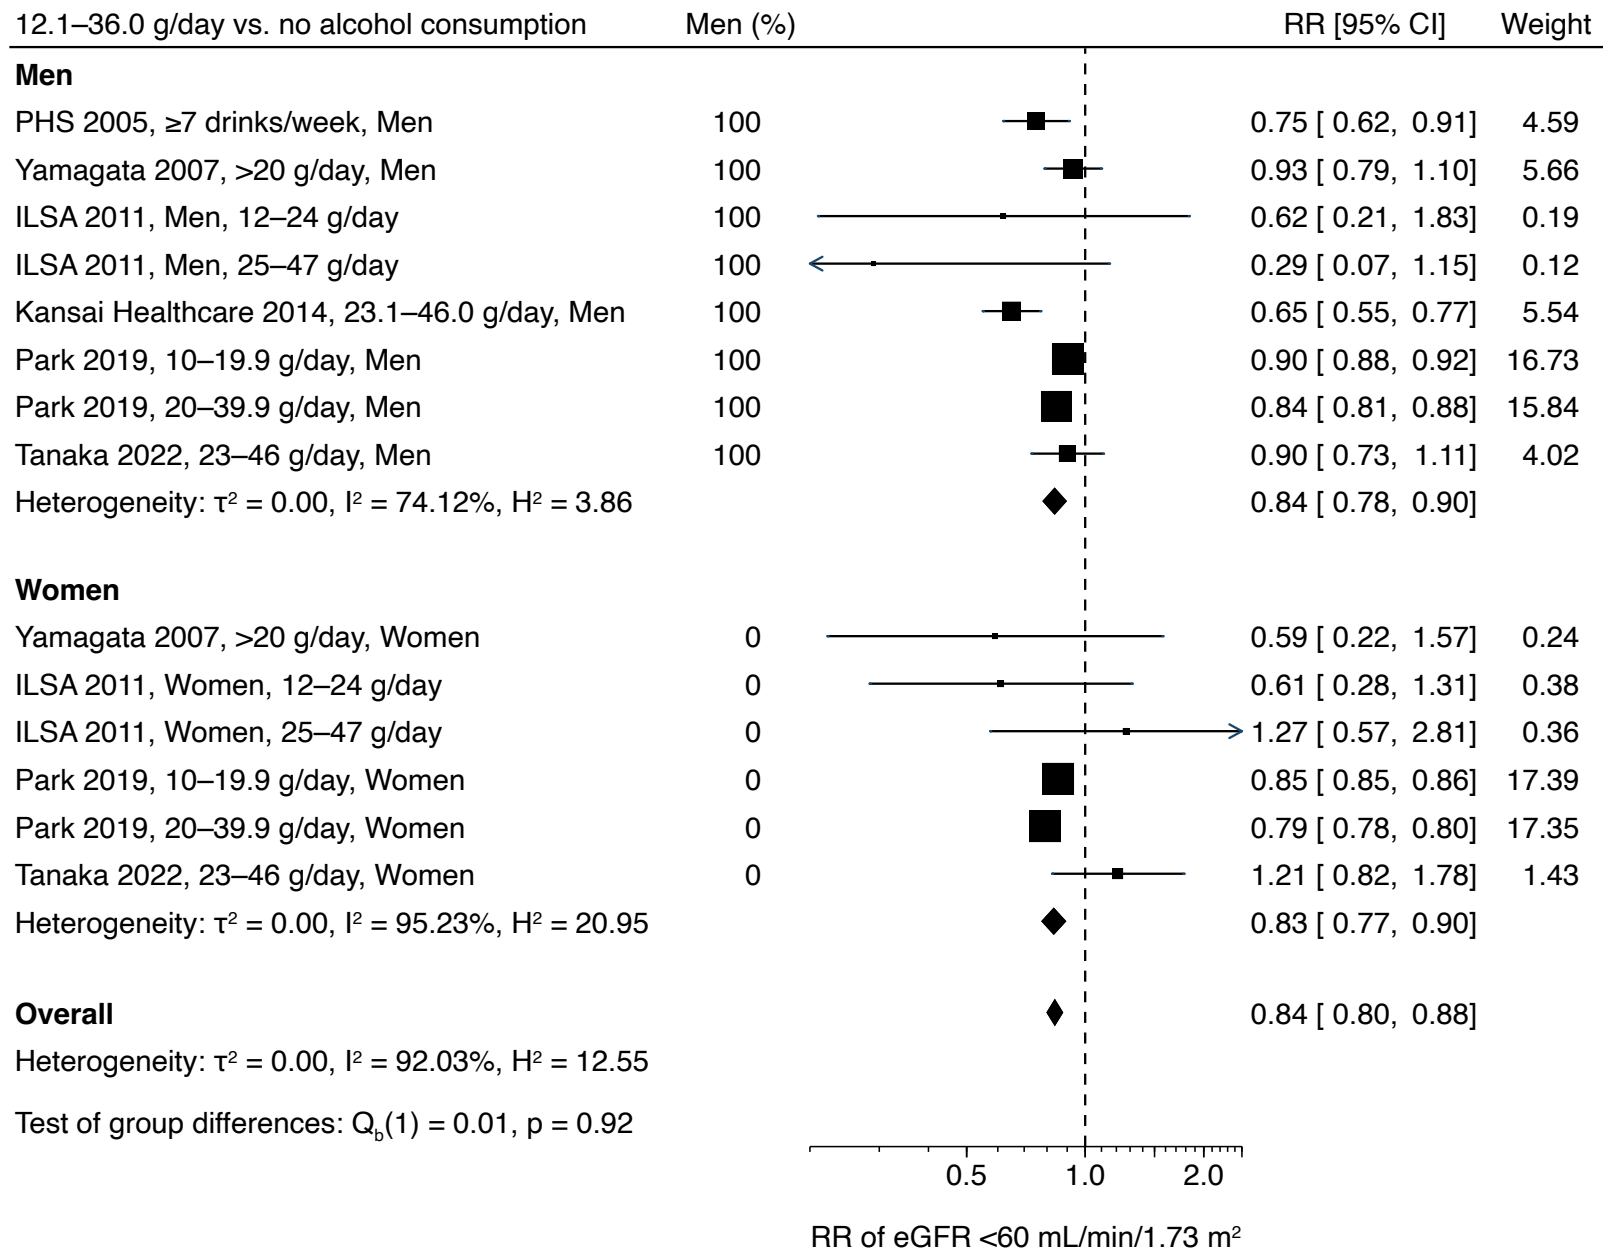

Figure S7b

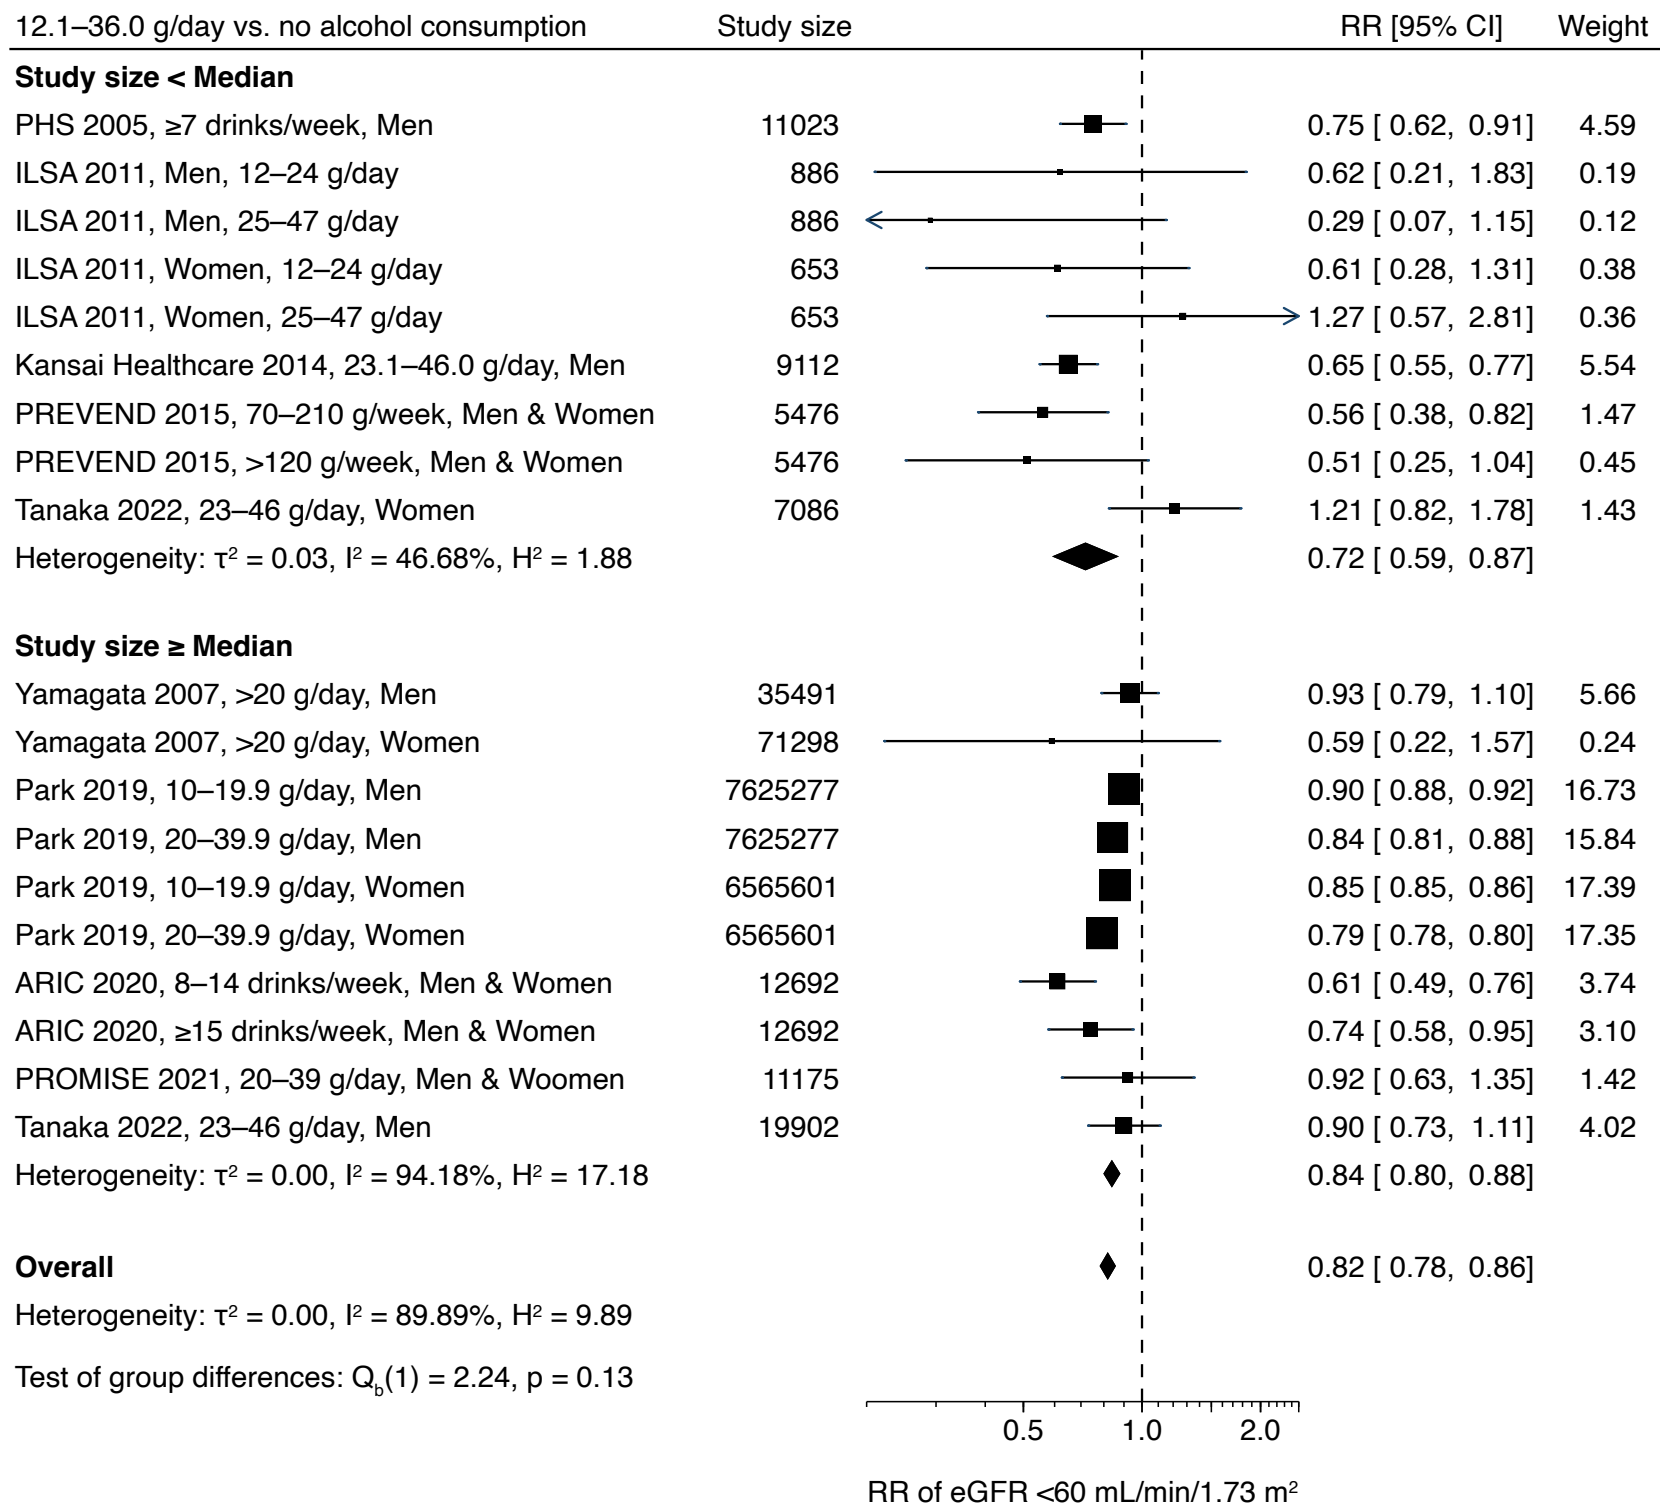

Figure S7c

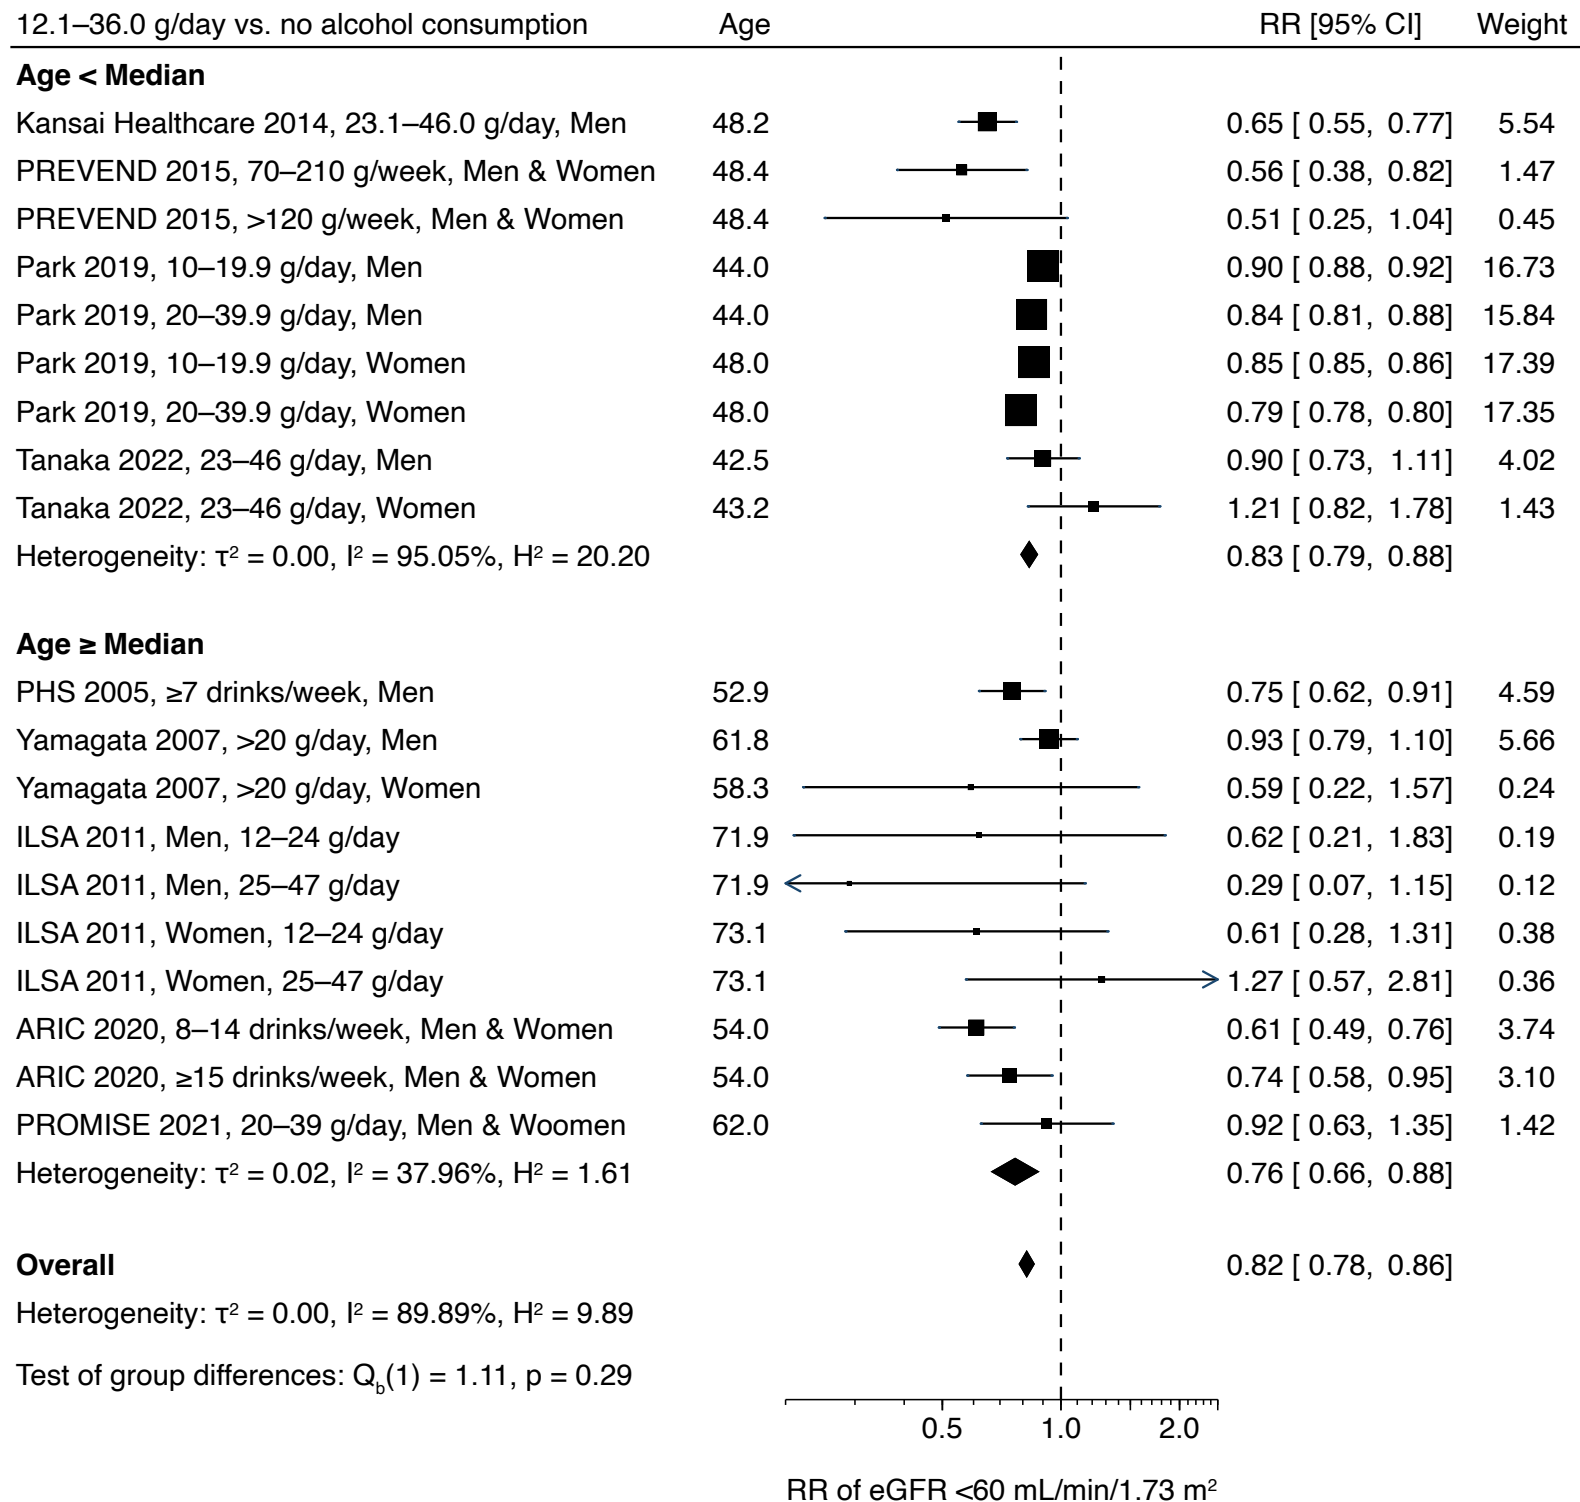

Figure S7d

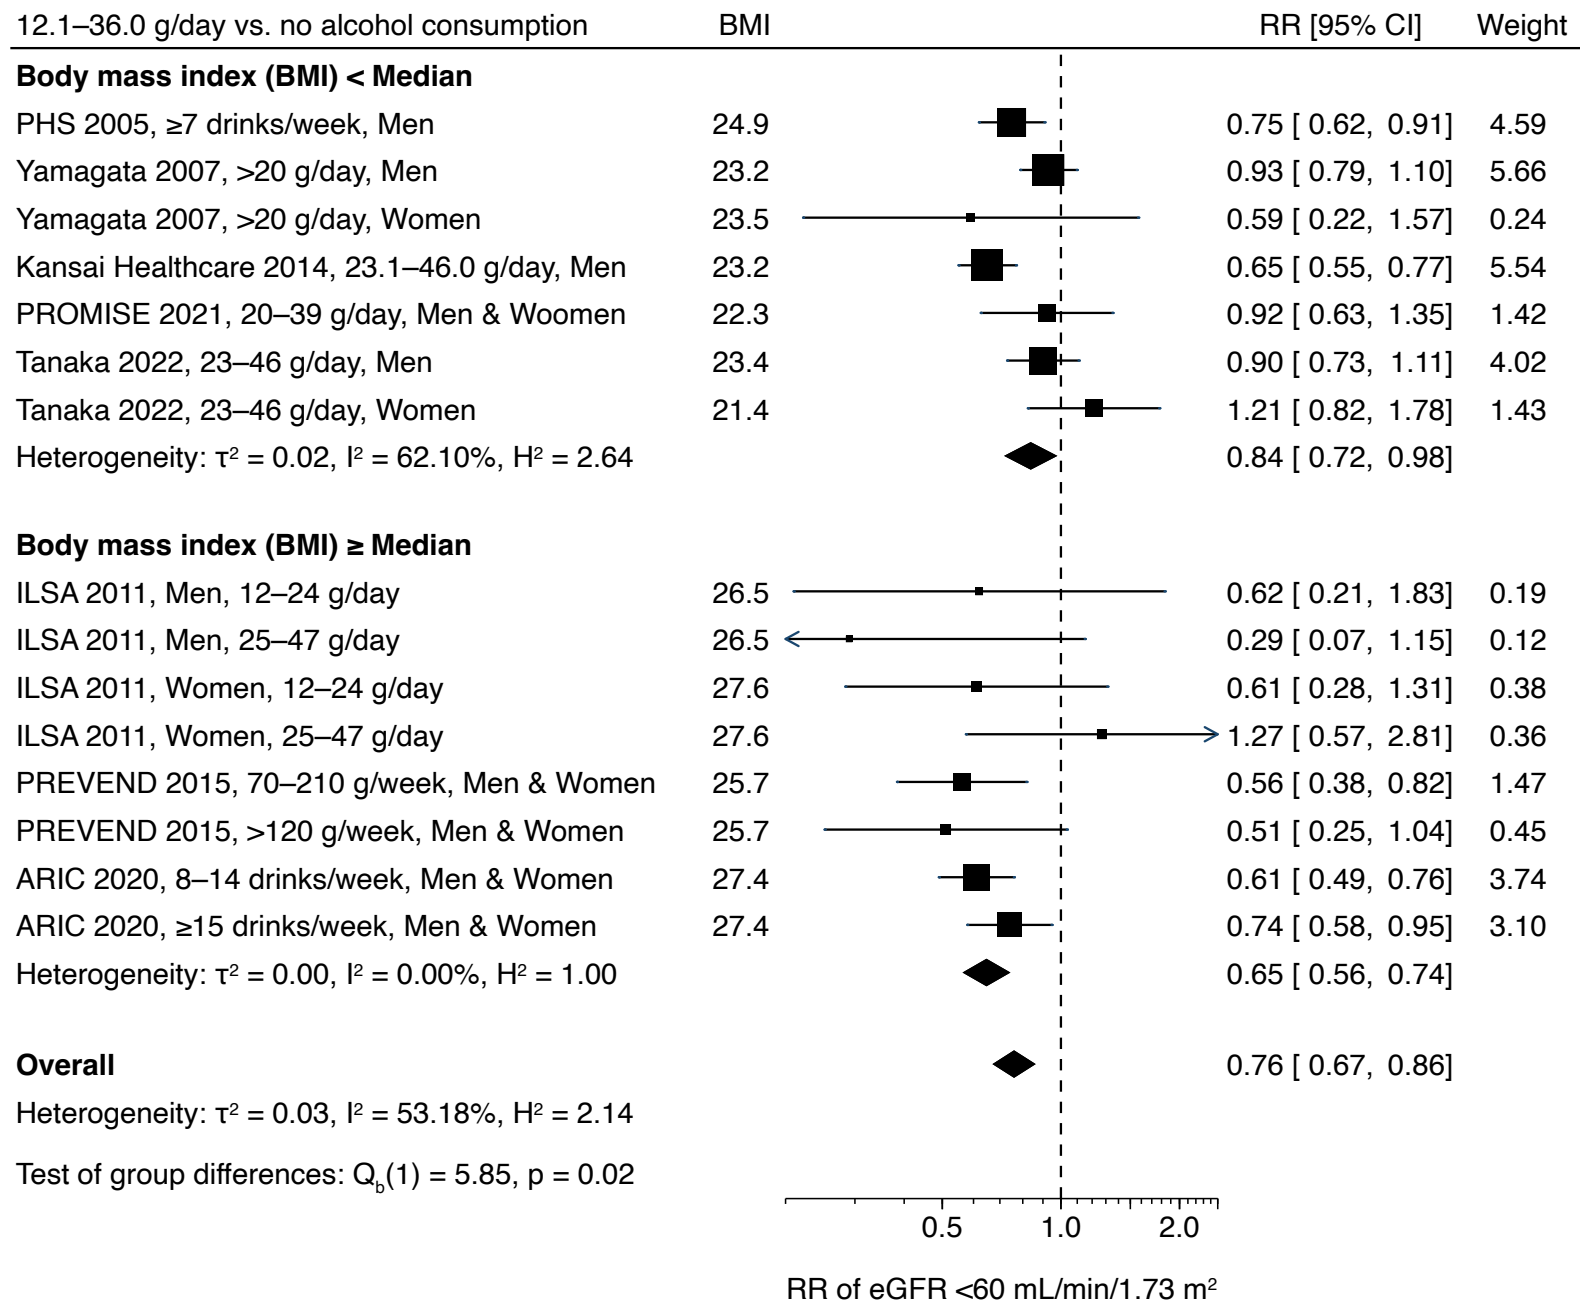

Figure S7e

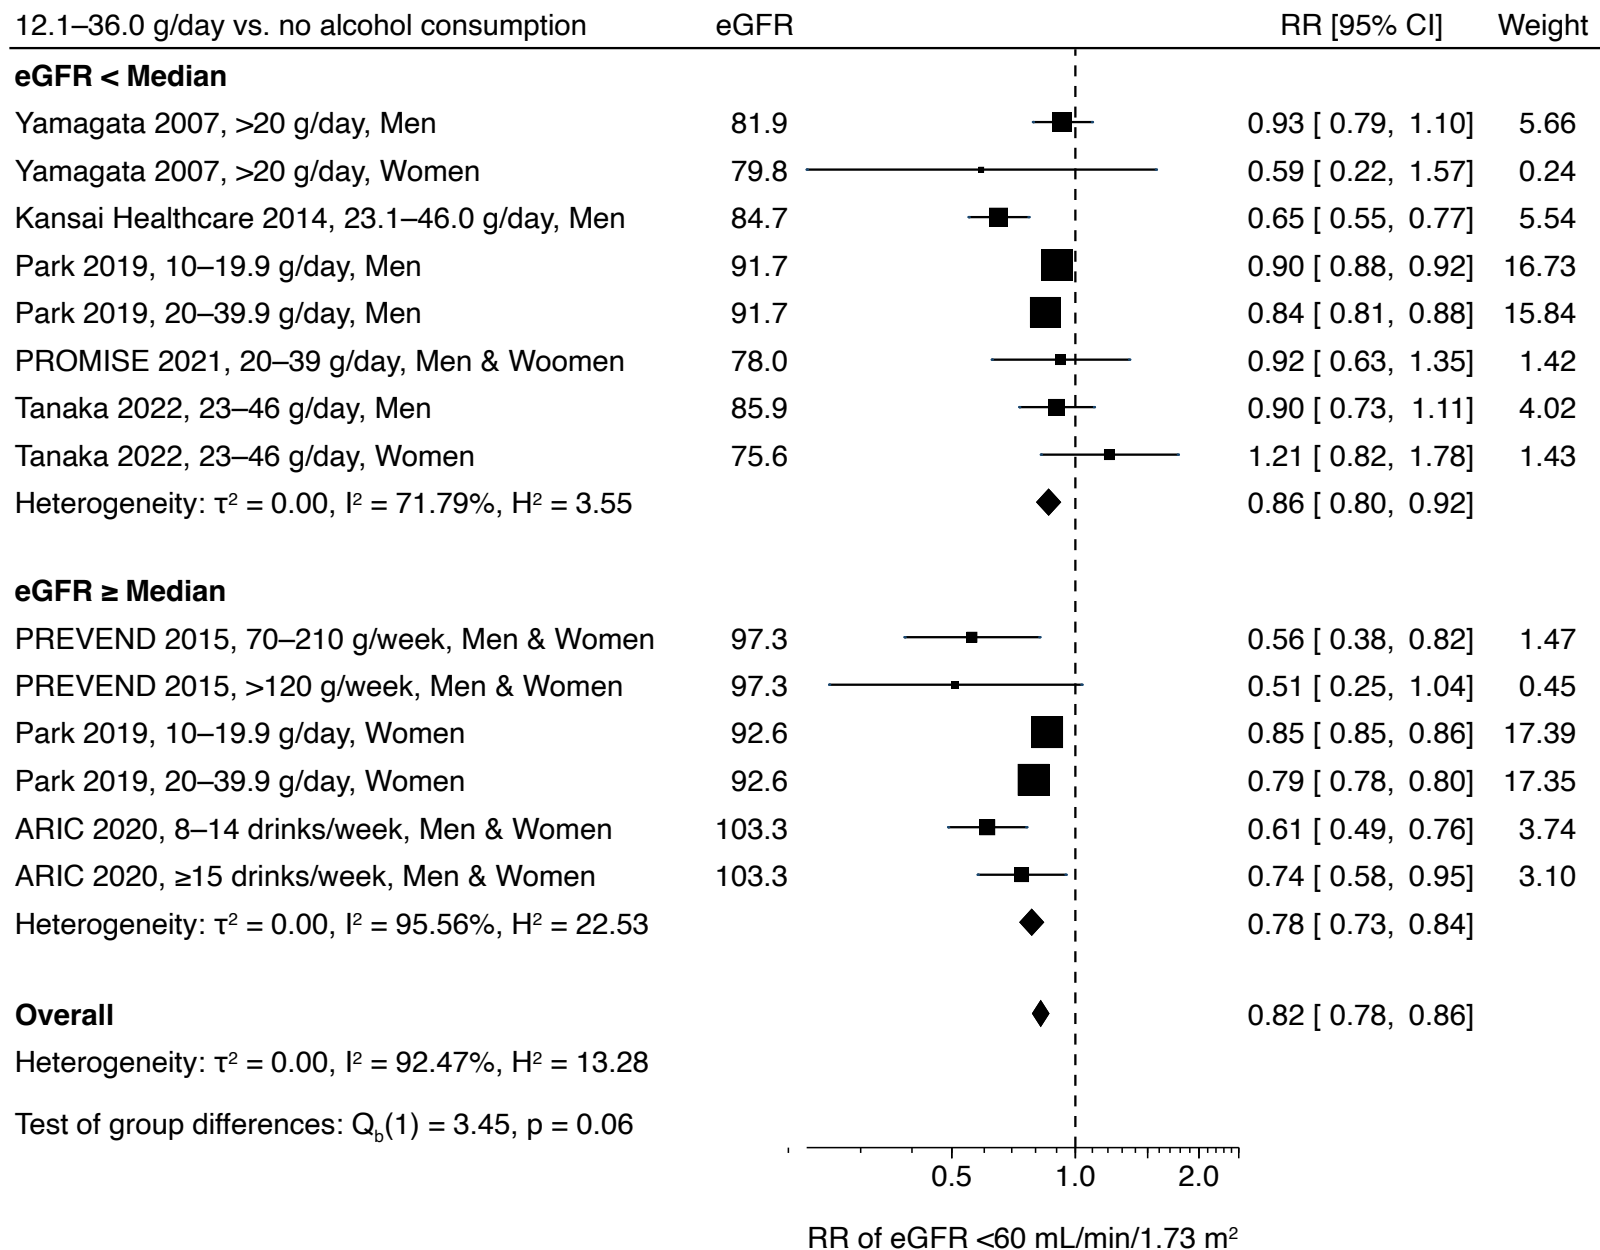

Figure S7f

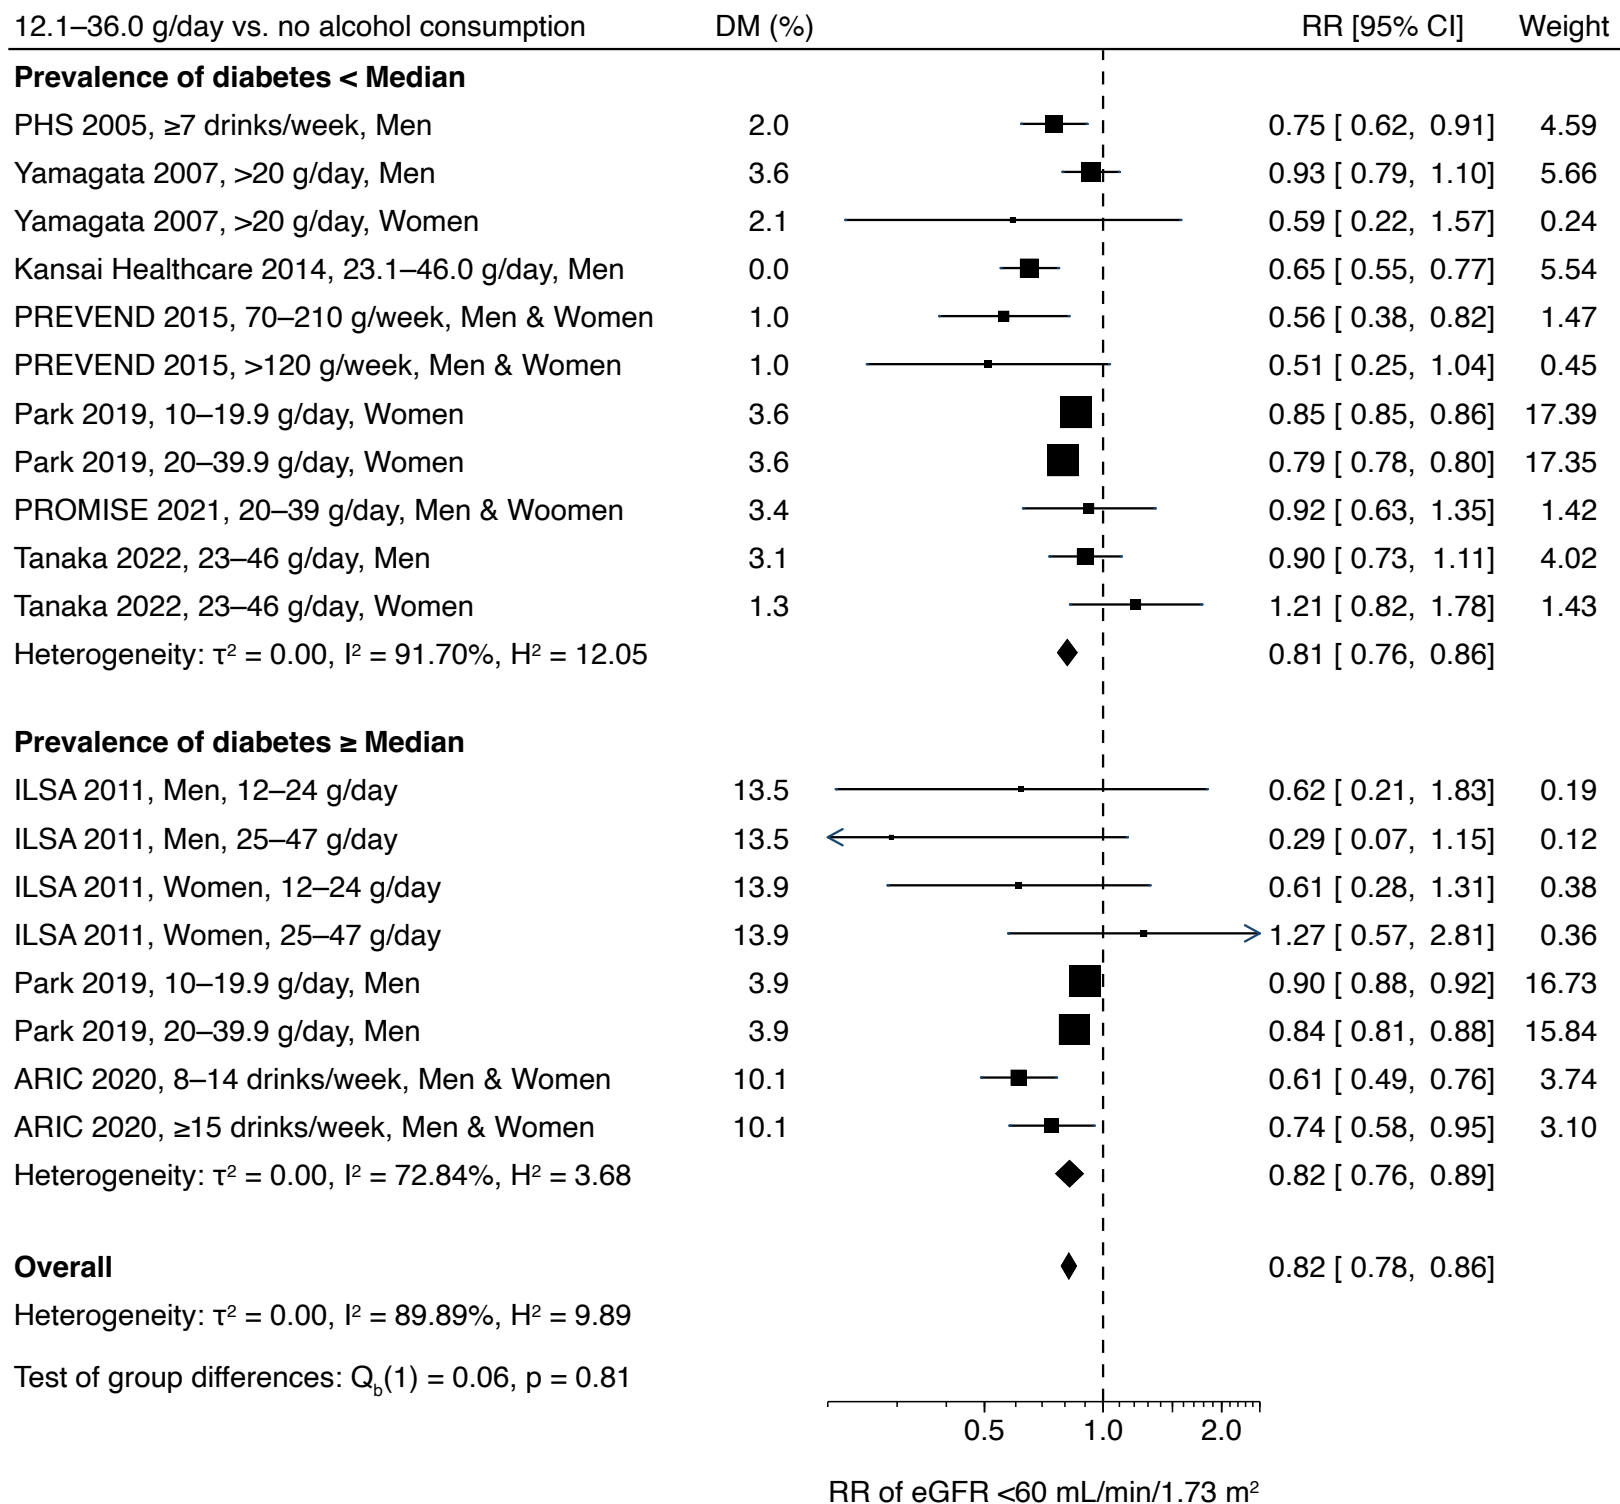

Figure S7g

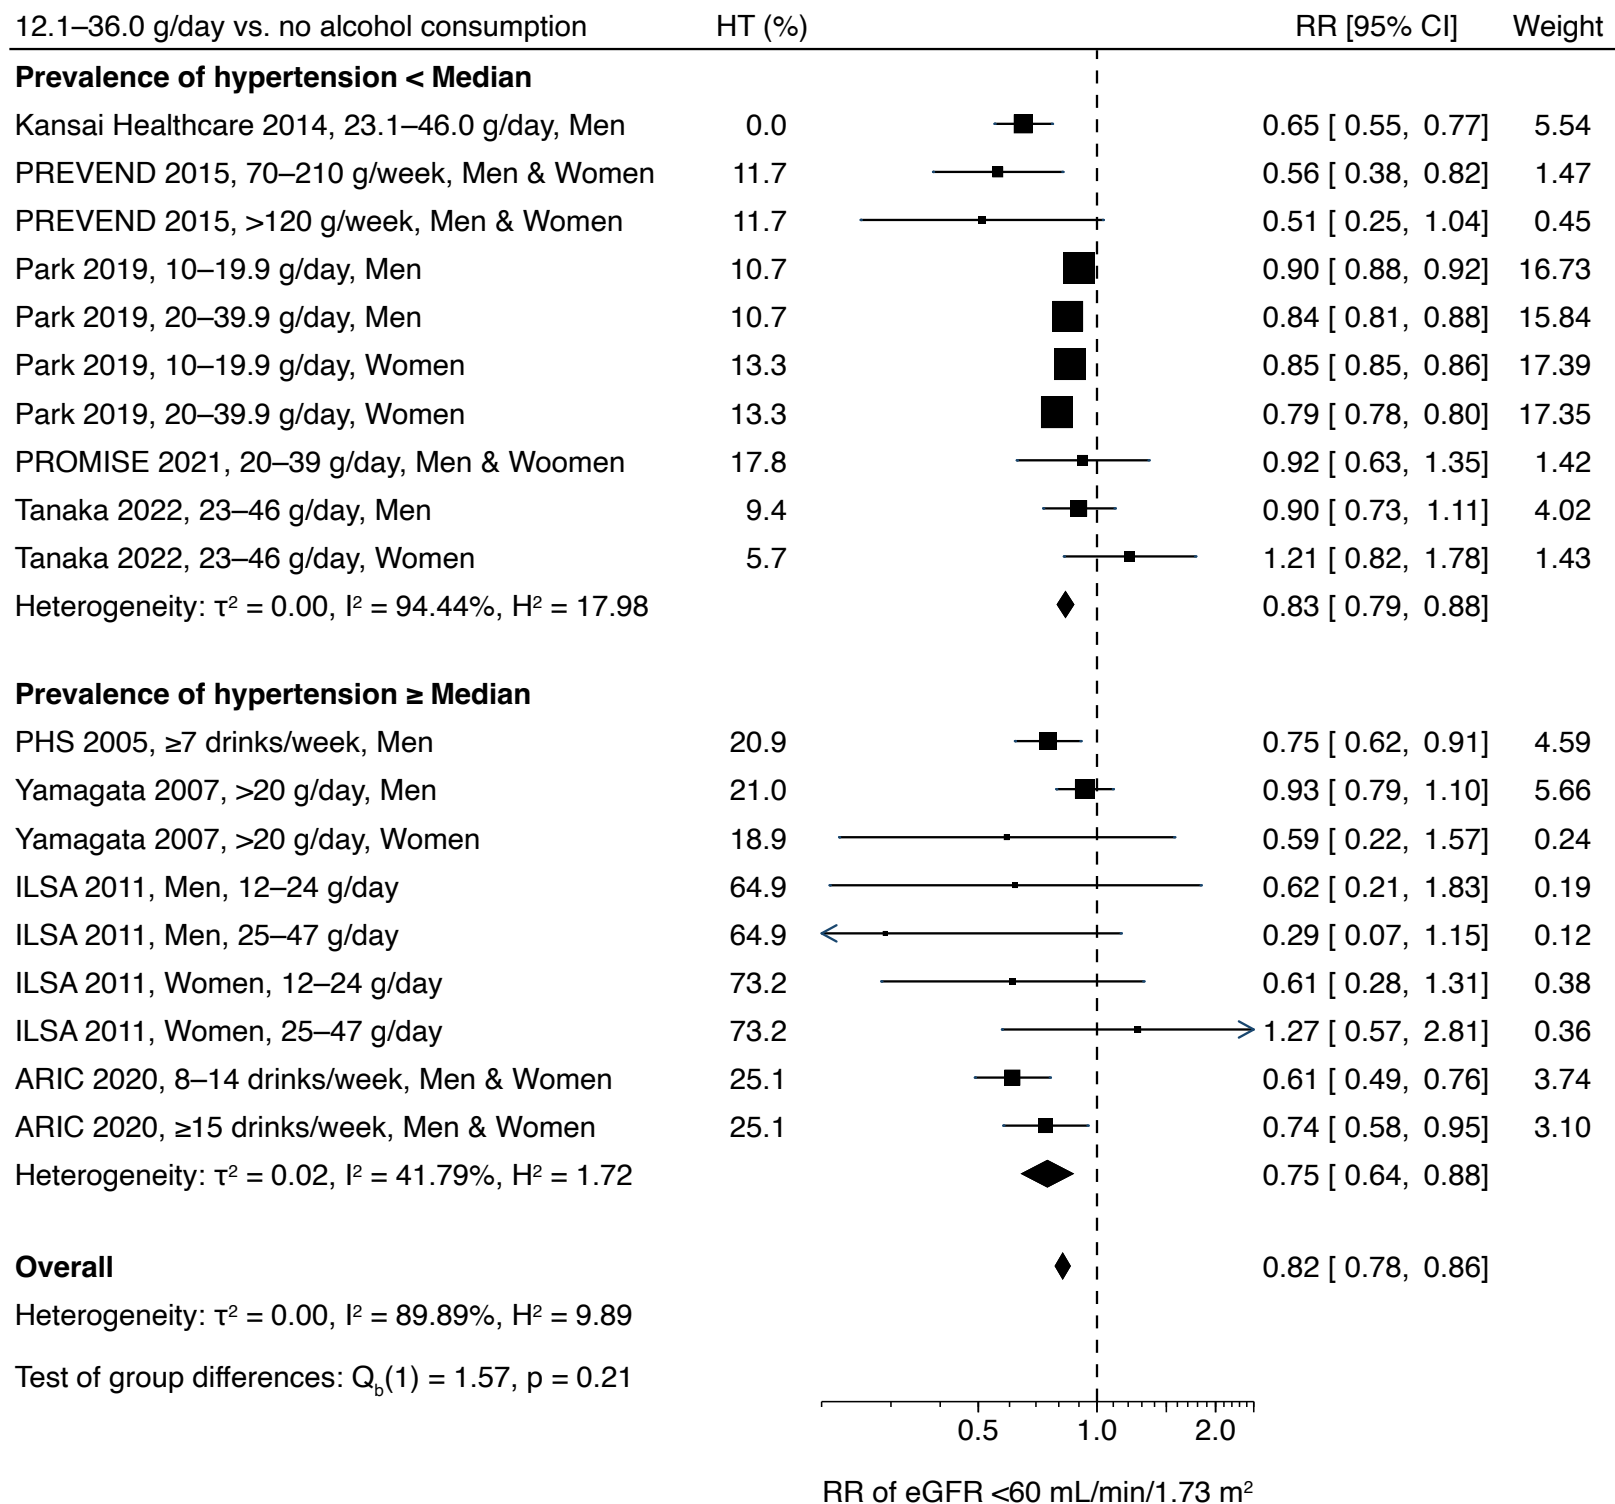

Figure S7h

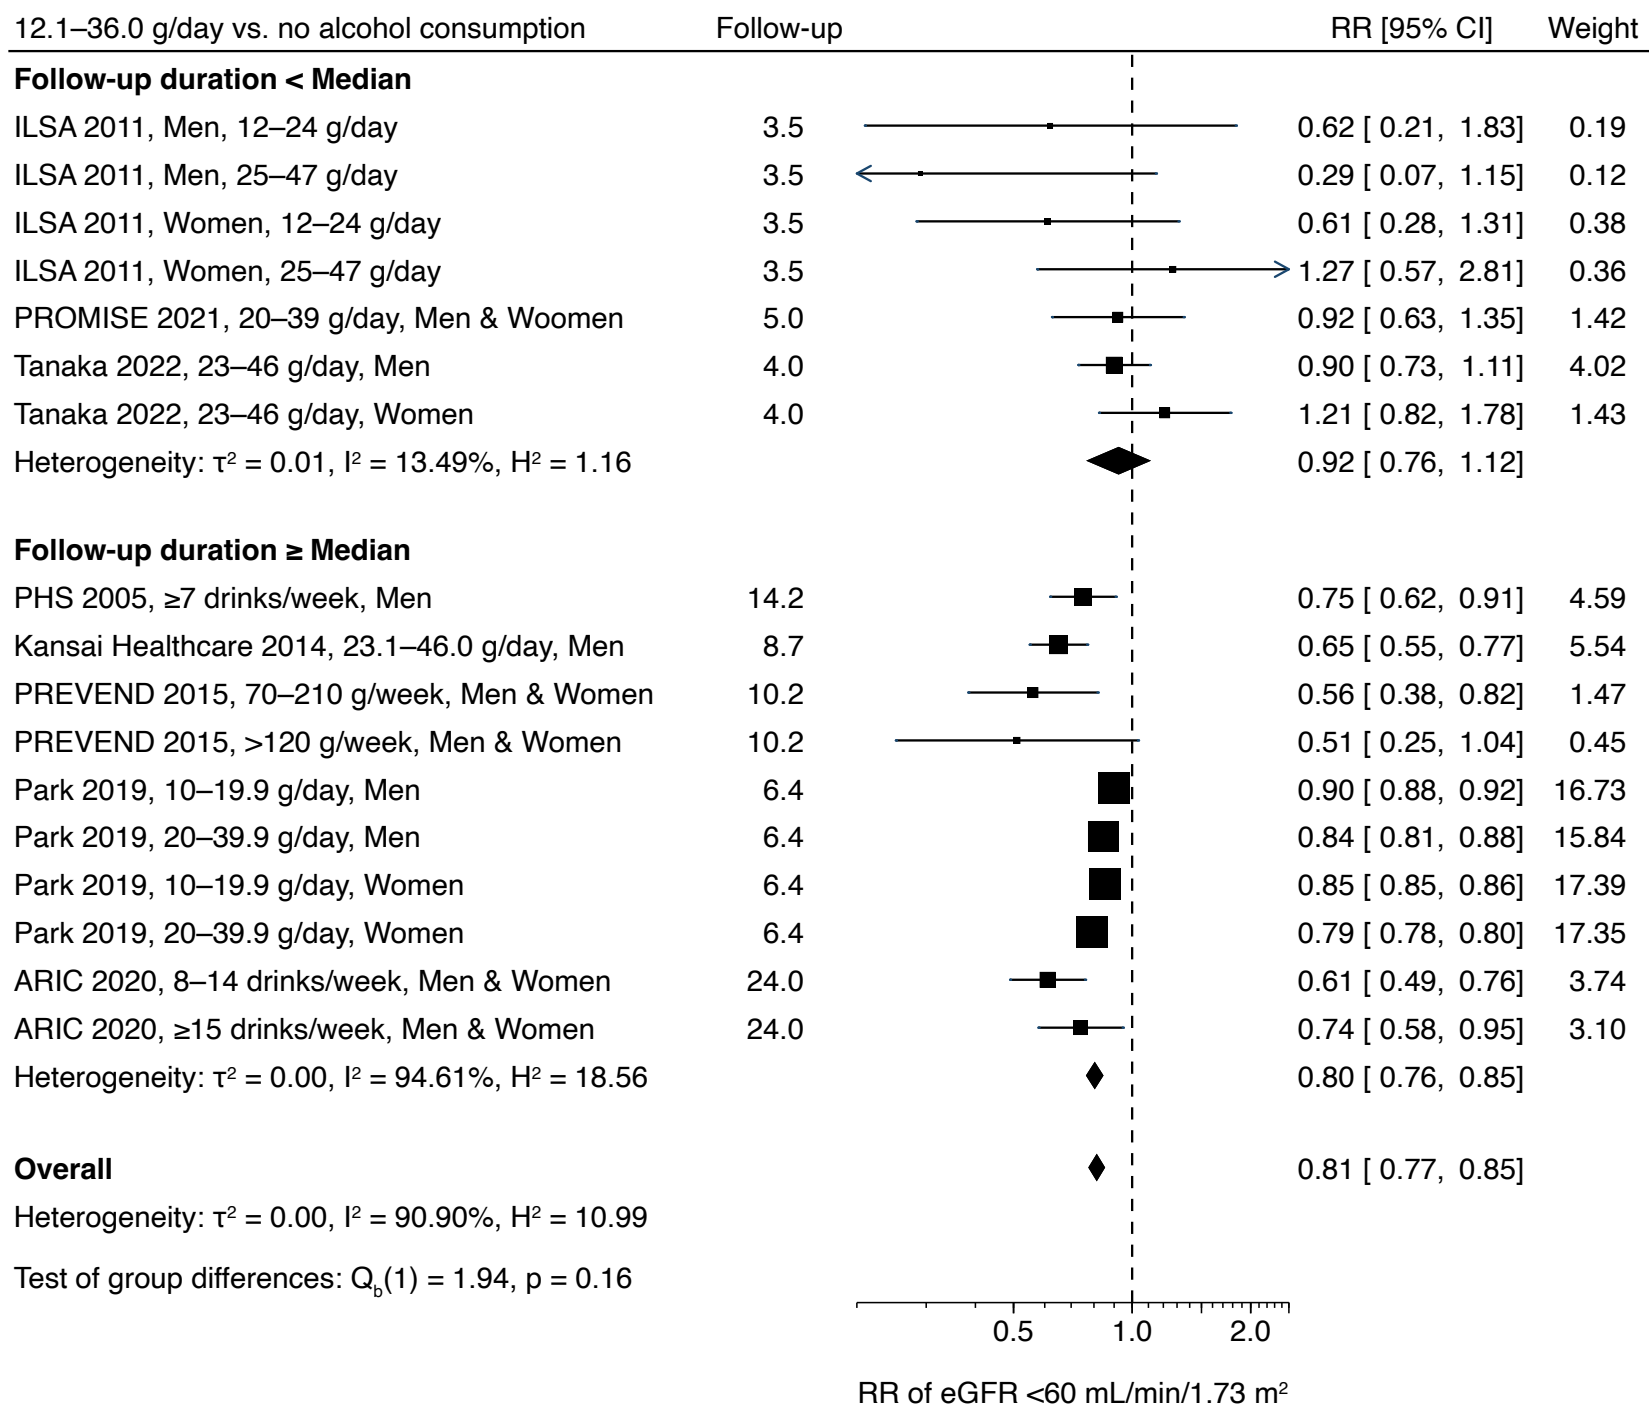



Figure S7i

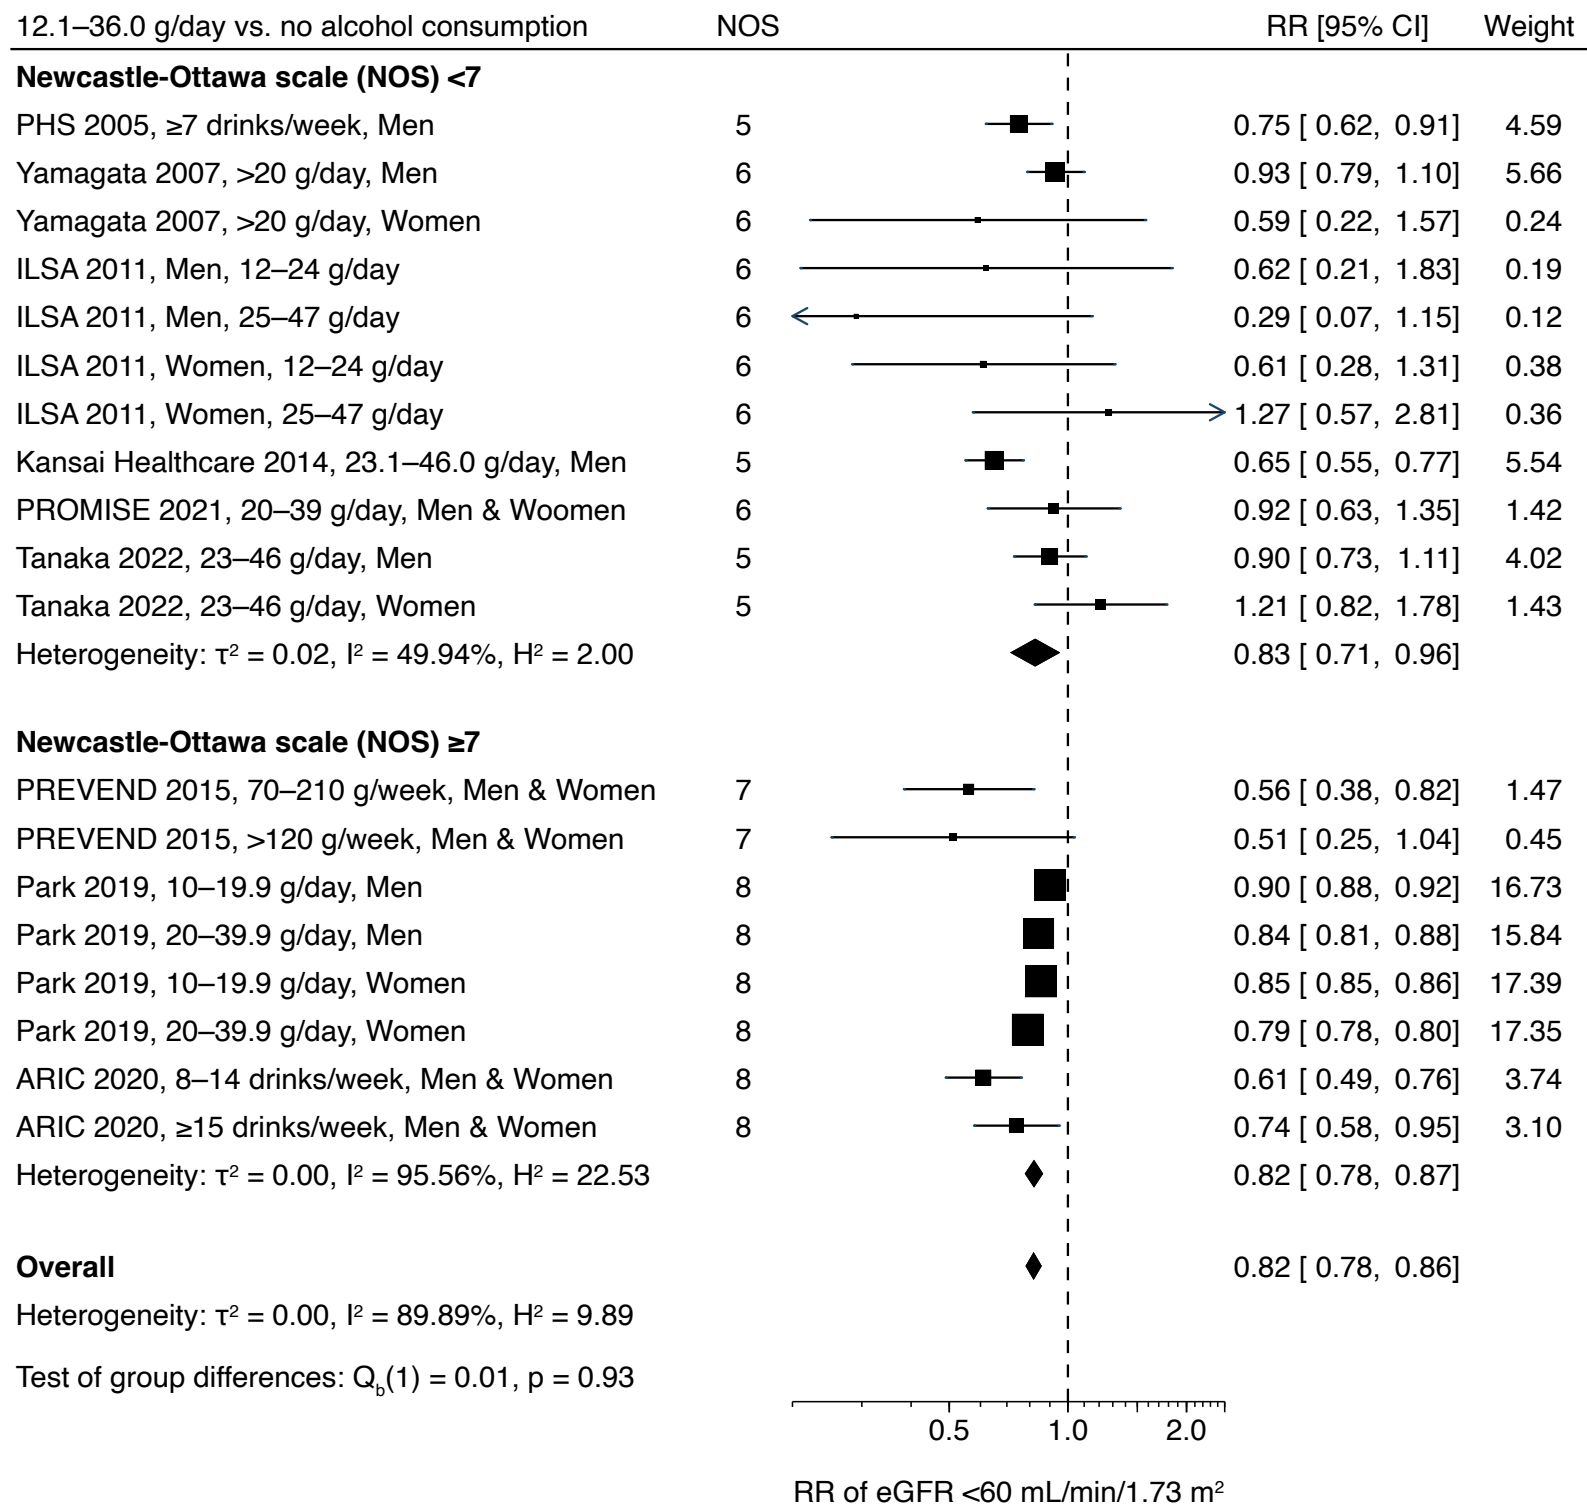

Figure S7j

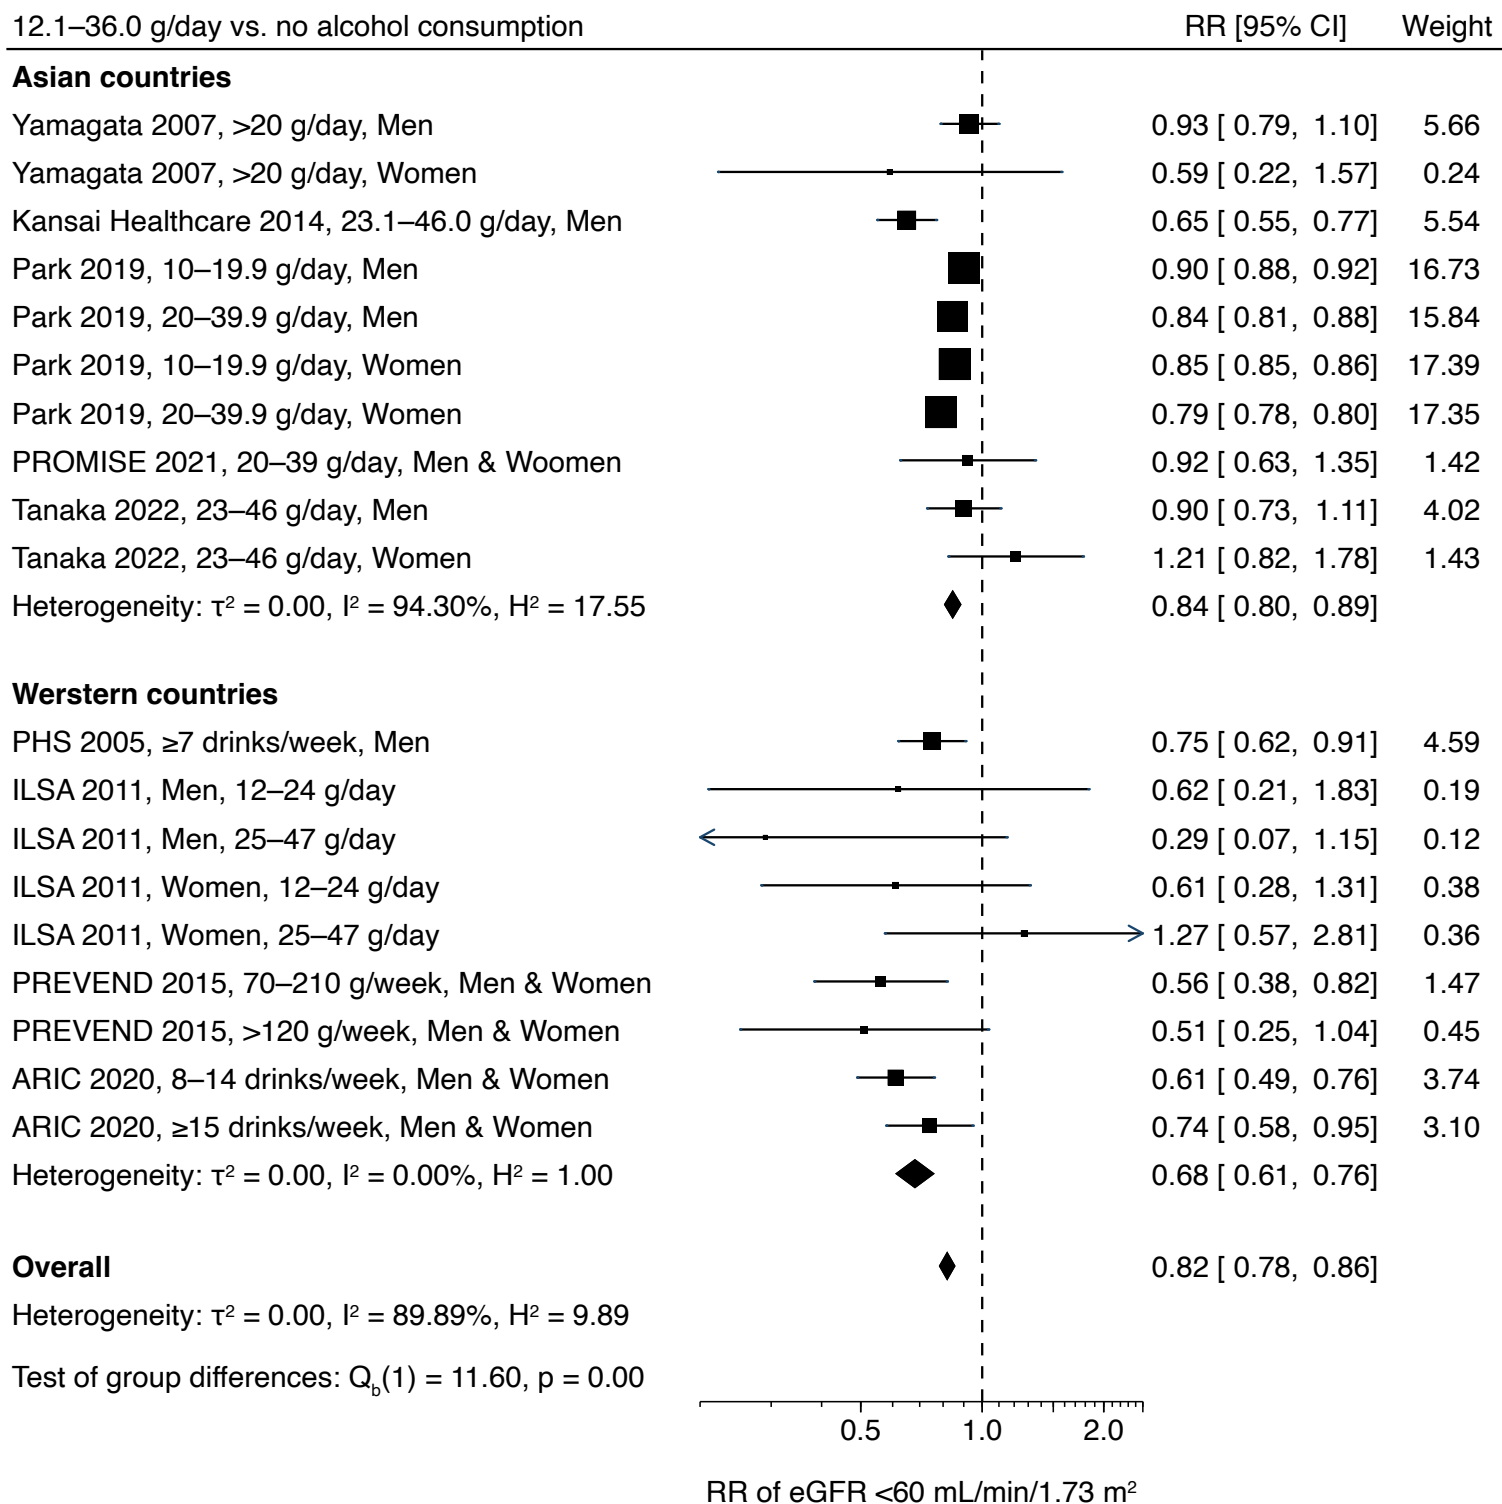

Figure S8a

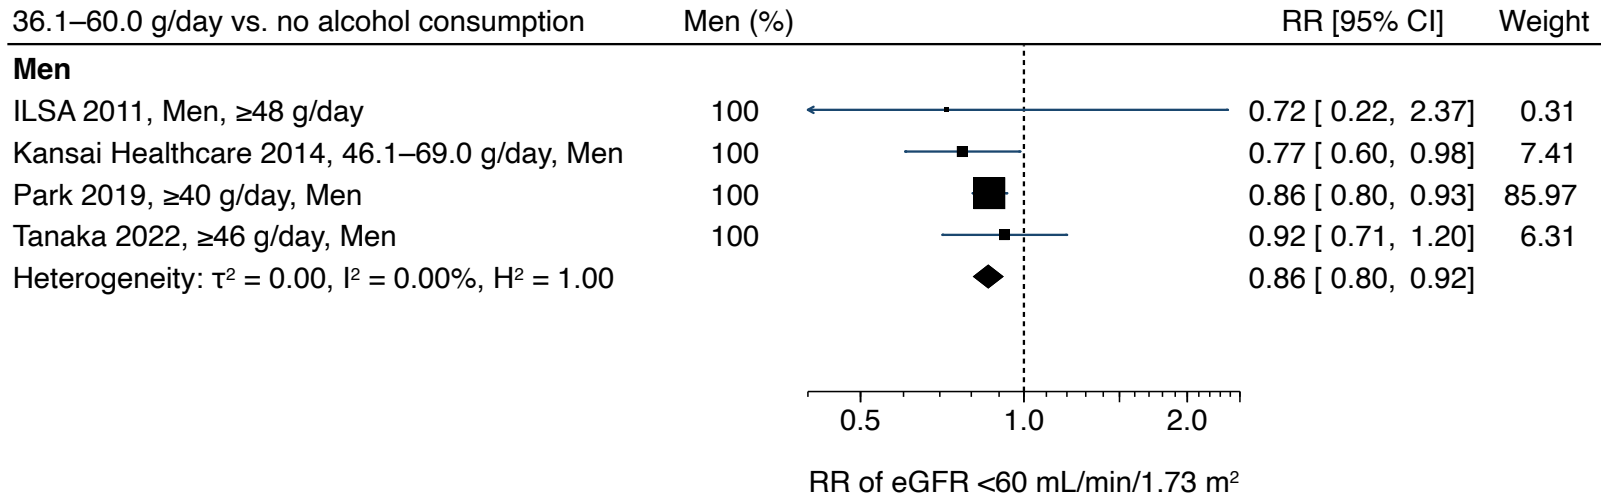

Figure S8b

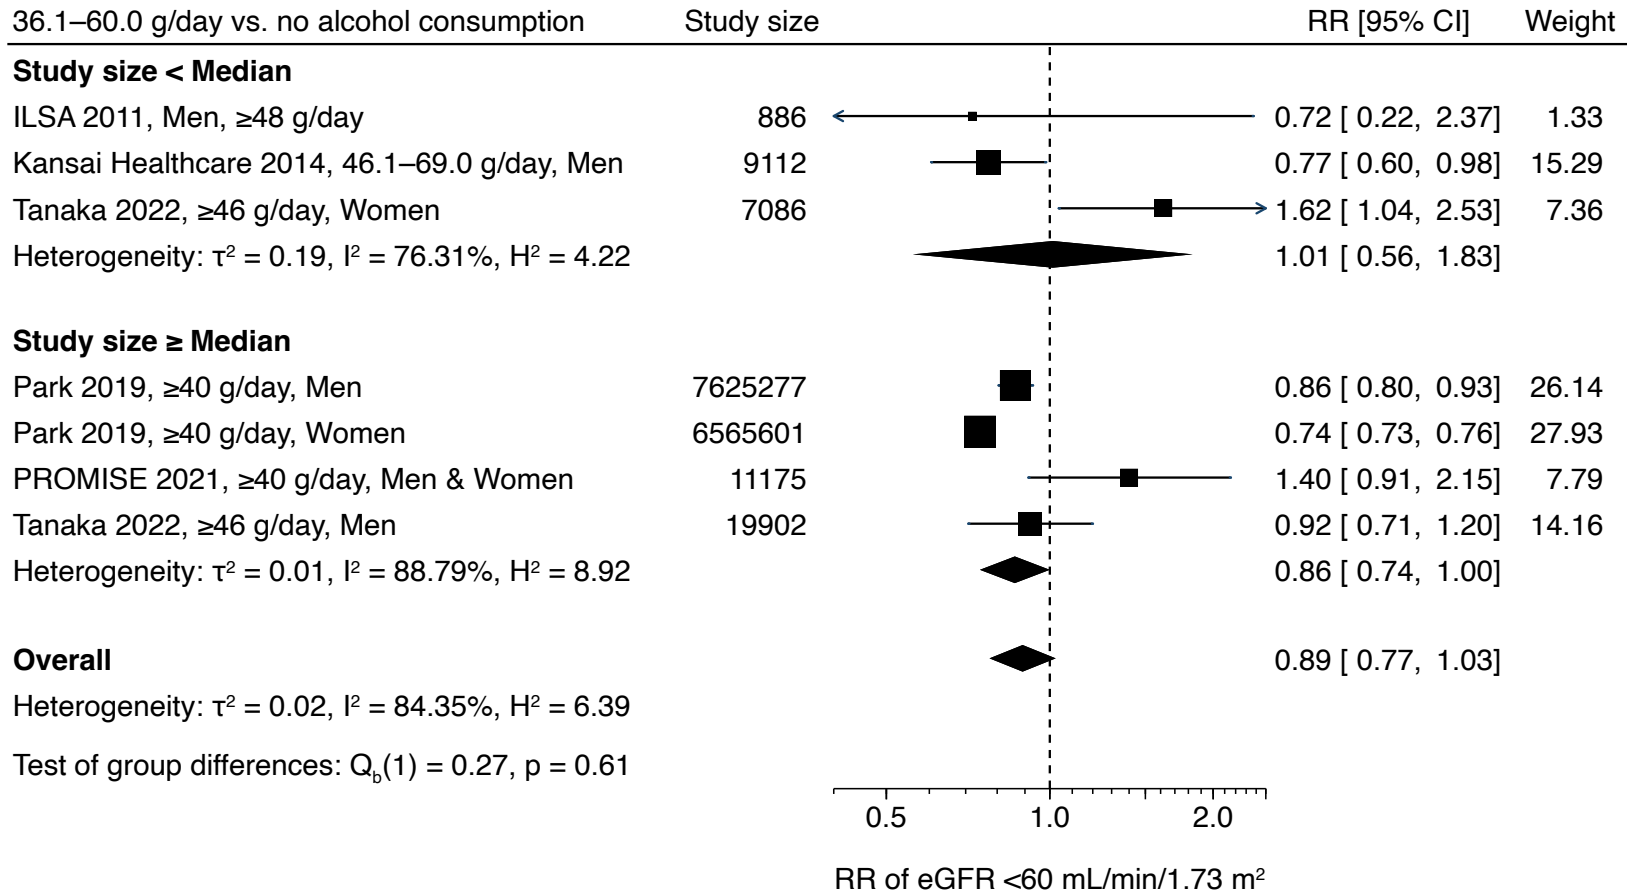

Figure S8c

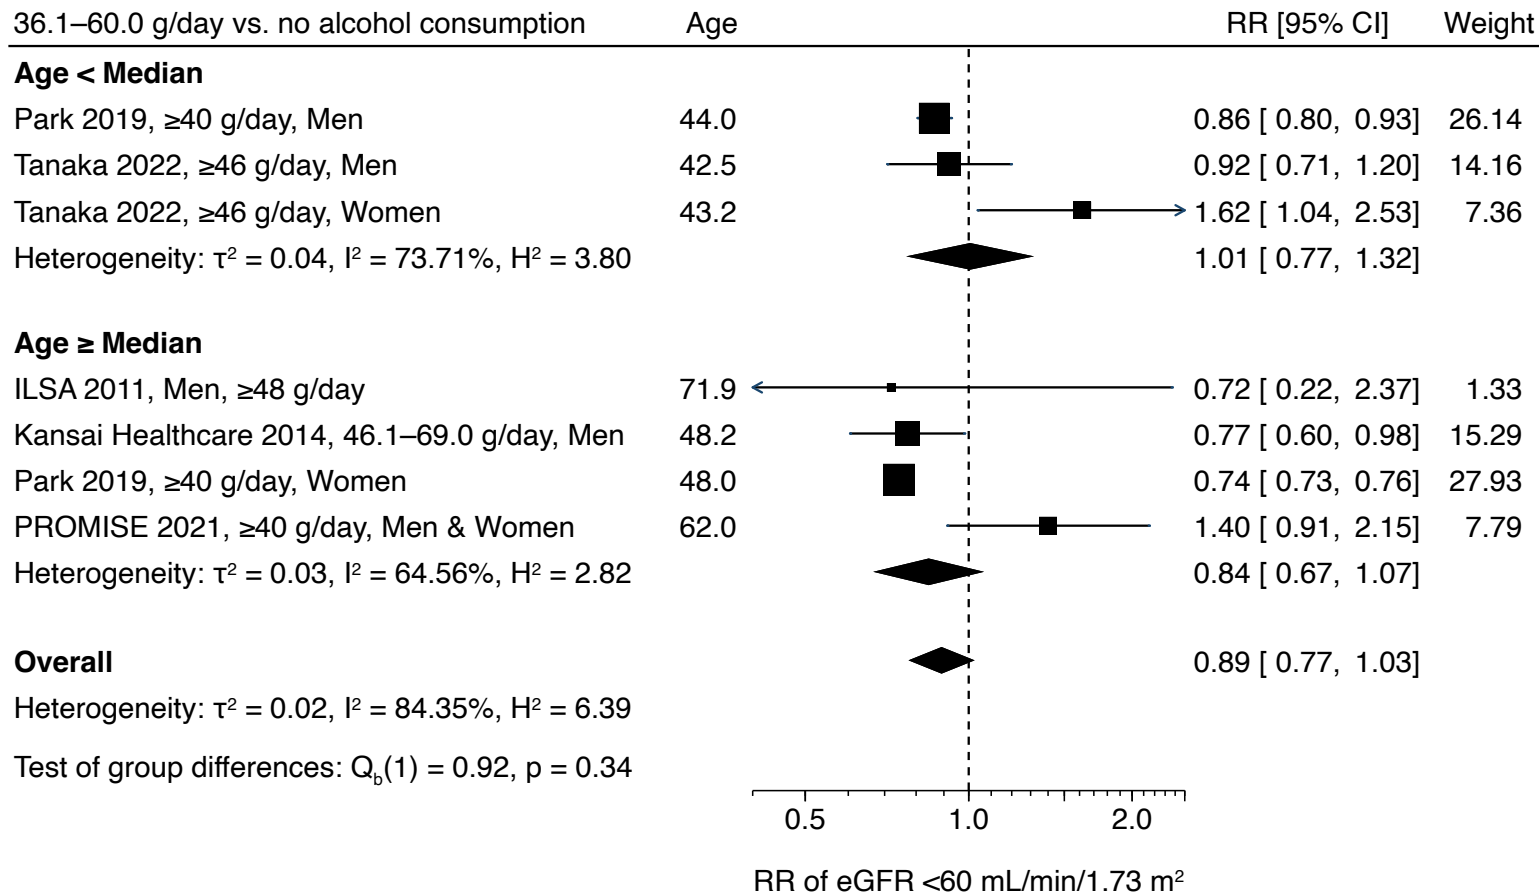

Figure S8d

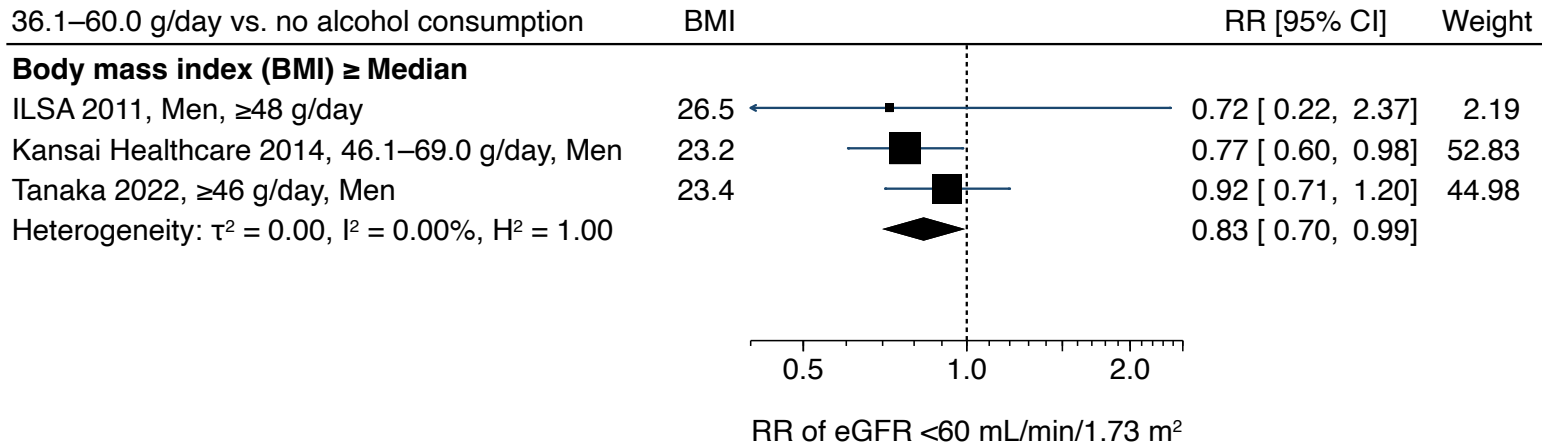

Figure S8e

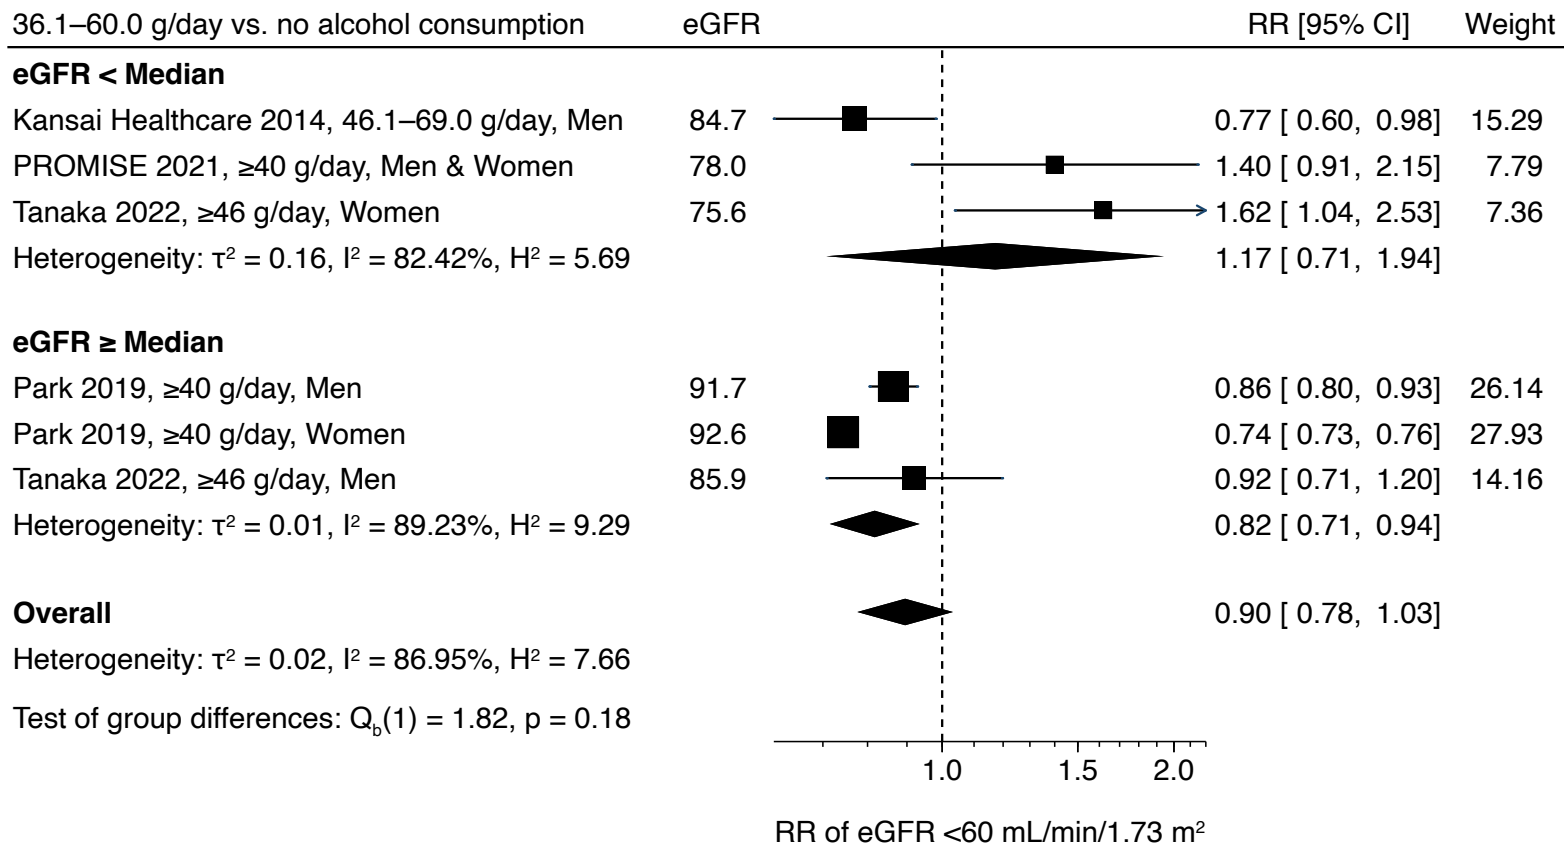

Figure S8f

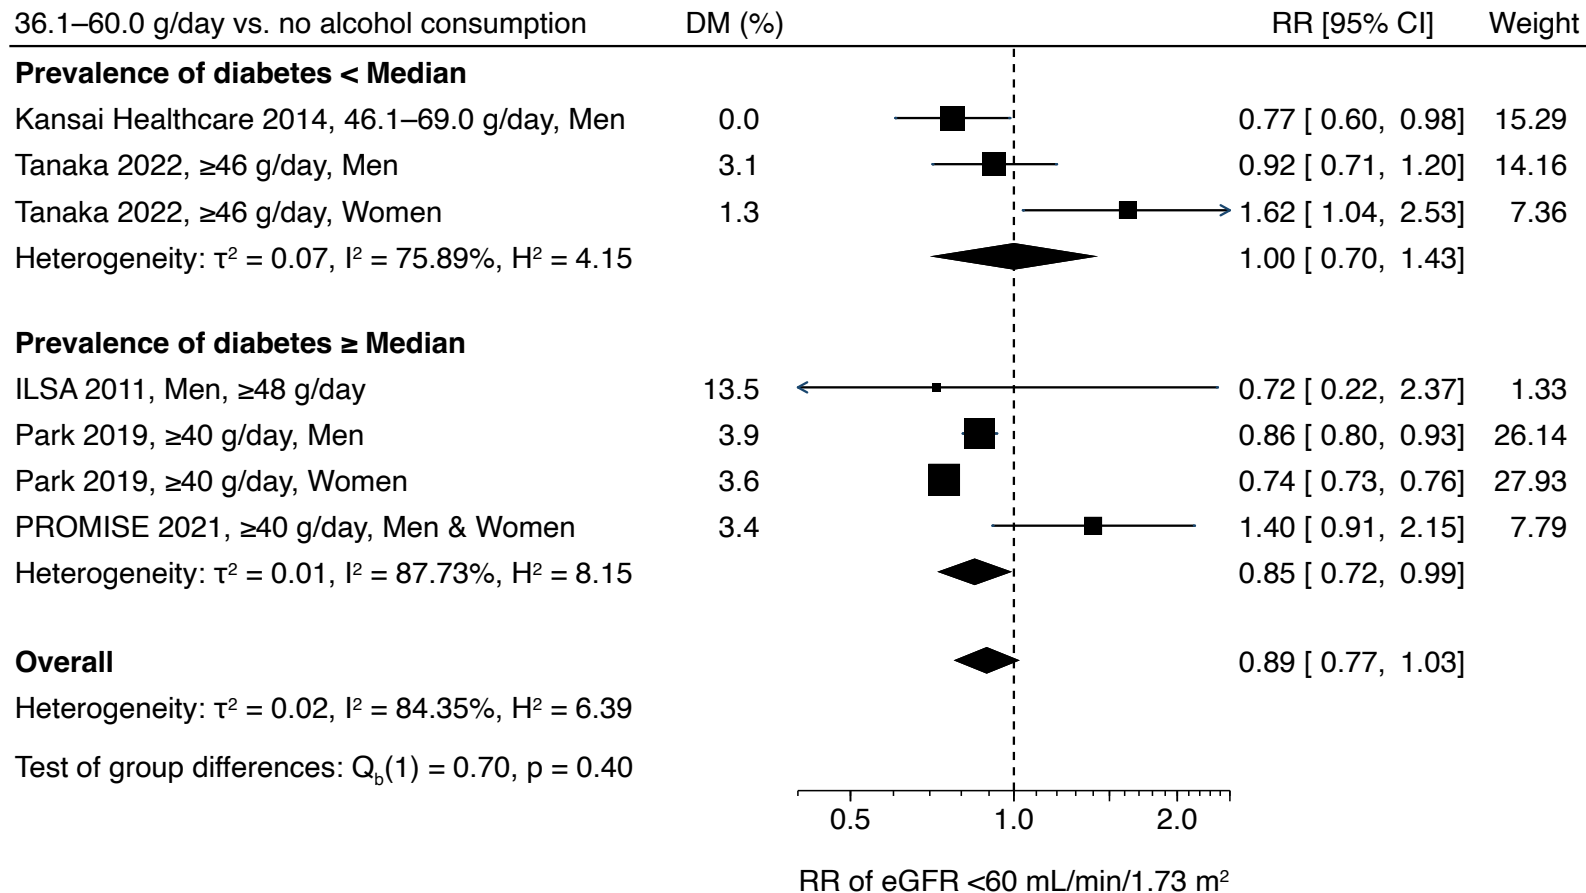



Figure S8g

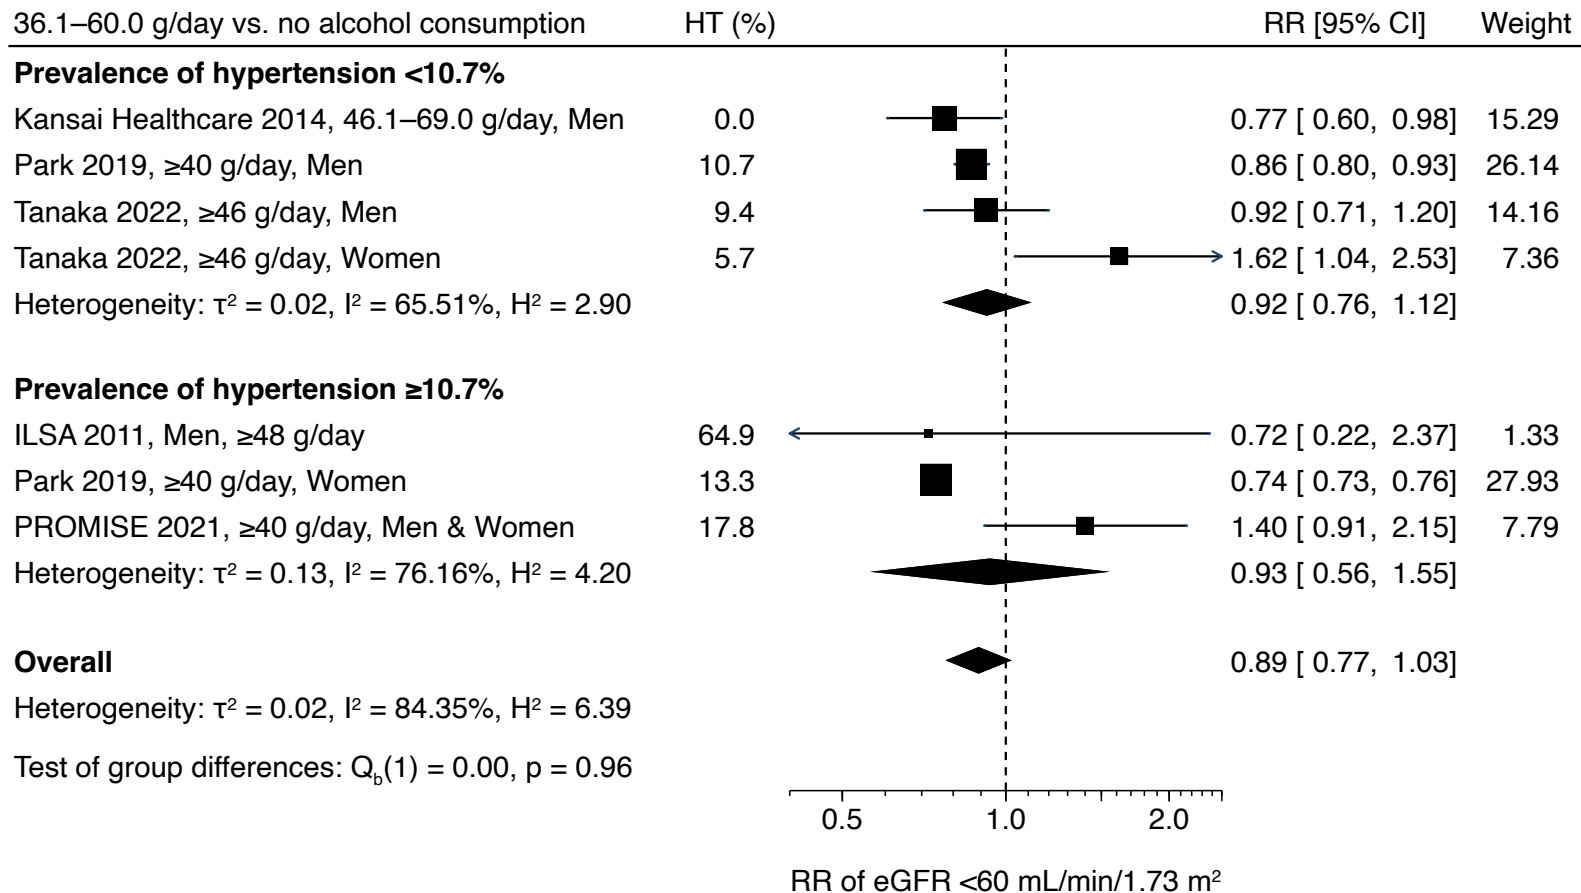

Figure S8h

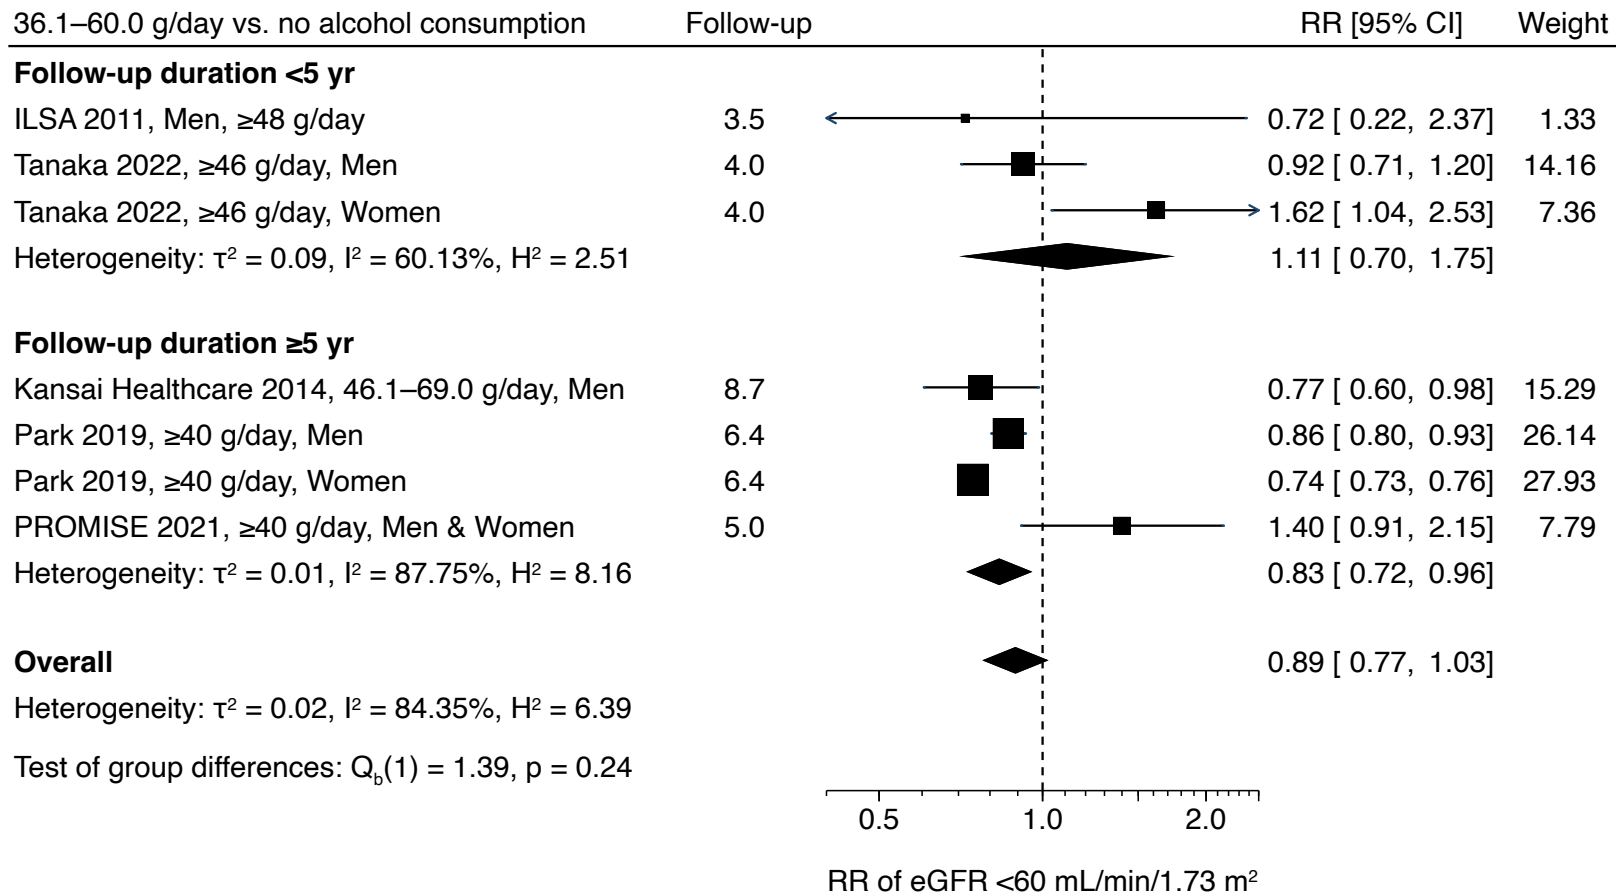

Figure S8i

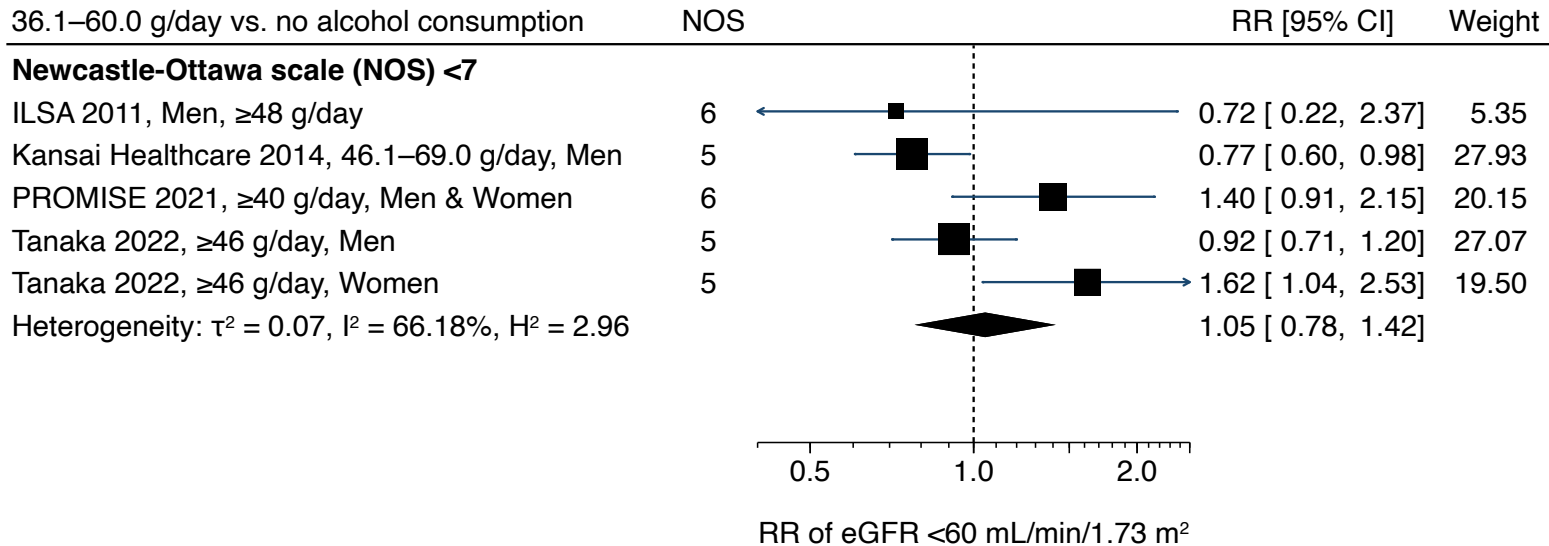

Figure S8j

36.1–60.0 g/day vs. no alcohol consumption

RR [95% CI]

Weight

**Asian countries**

Kansai Healthcare 2014, 46.1–69.0 g/day, Men

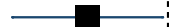

0.77 [ 0.60, 0.98]

15.59

Park 2019,  $\geq 40$  g/day, Men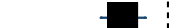

0.86 [ 0.80, 0.93]

26.32

Park 2019,  $\geq 40$  g/day, Women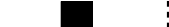

0.74 [ 0.73, 0.76]

28.05

PROMISE 2021,  $\geq 40$  g/day, Men & Women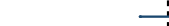

1.40 [ 0.91, 2.15]

8.01

Tanaka 2022,  $\geq 46$  g/day, Men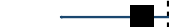

0.92 [ 0.71, 1.20]

14.46

Tanaka 2022,  $\geq 46$  g/day, Women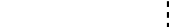

1.62 [ 1.04, 2.53]

7.58

Heterogeneity:  $\tau^2 = 0.02$ ,  $I^2 = 86.95\%$ ,  $H^2 = 7.66$ 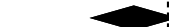

0.90 [ 0.78, 1.03]

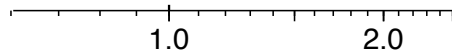RR of eGFR  $< 60$  mL/min/1.73 m<sup>2</sup>
